# Supplementary material
Source: PubMed Central journal article supplement (PMC9945479)

**Supplemental Table 10**  
*ANOVA on Factor Scores by Race*

|                      |       | Descriptives   |         |                |            |                                  |             |         |         |                            |         |
|----------------------|-------|----------------|---------|----------------|------------|----------------------------------|-------------|---------|---------|----------------------------|---------|
|                      |       | N              | Mean    | Std. Deviation | Std. Error | 95% Confidence Interval for Mean |             | Minimum | Maximum | Between-Component Variance |         |
|                      |       |                |         |                |            | Lower Bound                      | Upper Bound |         |         |                            |         |
| WAIS-General         | WHITE | 1496           | .10526  | .884217        | .022861    | .06042                           | .15010      | -2.890  | 2.378   |                            |         |
|                      | BLACK | 264            | -.64508 | .763621        | .046998    | -.73762                          | -.55254     | -2.425  | 1.178   |                            |         |
|                      | OTHER | 151            | .08498  | .796052        | .064782    | -.04302                          | .21298      | -1.779  | 2.315   |                            |         |
|                      | Total | 1911           | .00000  | .899327        | .020573    | -.04035                          | .04035      | -2.890  | 2.378   |                            |         |
|                      | Model | Fixed Effects  |         |                | .861859    | .019715                          | -.03866     | .03867  |         |                            |         |
|                      |       | Random Effects |         |                |            | .341625                          | -1.46989    | 1.46990 |         |                            | .182273 |
| Verbal Comprehension | WHITE | 1496           | .11029  | .875949        | .022647    | .06587                           | .15471      | -2.863  | 2.608   |                            |         |
|                      | BLACK | 264            | -.70622 | .791926        | .048740    | -.80219                          | -.61025     | -2.408  | 1.475   |                            |         |
|                      | OTHER | 151            | .14192  | .859191        | .069920    | .00377                           | .28008      | -1.942  | 2.217   |                            |         |
|                      | Total | 1911           | -.00001 | .908272        | .020777    | -.04076                          | .04074      | -2.863  | 2.608   |                            |         |
|                      | Model | Fixed Effects  |         |                | .863530    | .019754                          | -.03875     | .03873  |         |                            |         |
|                      |       | Random Effects |         |                |            | .374341                          | -1.61067    | 1.61065 |         |                            | .218974 |
| Perceptual Reasoning | WHITE | 1496           | .10658  | .875852        | .022645    | .06216                           | .15100      | -2.882  | 2.379   |                            |         |
|                      | BLACK | 264            | -.64847 | .750672        | .046201    | -.73944                          | -.55750     | -2.476  | 1.288   |                            |         |
|                      | OTHER | 151            | .07781  | .775957        | .063147    | -.04696                          | .20258      | -1.625  | 2.052   |                            |         |
|                      | Total | 1911           | .00000  | .890403        | .020368    | -.03995                          | .03995      | -2.882  | 2.379   |                            |         |

**Supplemental Table 10**  
**ANOVA on Factor Scores by Race**

|                  |       |                |      |         |         |         |          |         |        |       |         |
|------------------|-------|----------------|------|---------|---------|---------|----------|---------|--------|-------|---------|
|                  | Model | Fixed Effects  |      |         | .852102 | .019492 | -.03823  | .03823  |        |       |         |
|                  |       | Random Effects |      |         |         | .343544 | -1.47815 | 1.47815 |        |       | .184346 |
| Working Memory   | WHITE |                | 1496 | .09707  | .872898 | .022568 | .05280   | .14134  | -2.800 | 2.748 |         |
|                  | BLACK |                | 264  | -.58358 | .750438 | .046186 | -.67452  | -.49264 | -2.245 | 1.774 |         |
|                  | OTHER |                | 151  | .05861  | .789104 | .064216 | -.06828  | .18549  | -1.920 | 2.430 |         |
|                  | Total |                | 1911 | .00000  | .881798 | .020172 | -.03956  | .03956  | -2.800 | 2.748 |         |
|                  | Model | Fixed Effects  |      |         | .850647 | .019459 | -.03816  | .03817  |        |       |         |
|                  |       | Random Effects |      |         |         | .309045 | -1.32971 | 1.32972 |        |       | .149069 |
| Processing Speed | WHITE |                | 1496 | .08008  | .859152 | .022213 | .03651   | .12366  | -2.520 | 2.721 |         |
|                  | BLACK |                | 264  | -.50104 | .783421 | .048216 | -.59598  | -.40610 | -2.376 | 1.517 |         |
|                  | OTHER |                | 151  | .08254  | .730110 | .059416 | -.03486  | .19994  | -1.702 | 2.075 |         |
|                  | Total |                | 1911 | .00000  | .862784 | .019737 | -.03871  | .03870  | -2.520 | 2.721 |         |
|                  | Model | Fixed Effects  |      |         | .839567 | .019205 | -.03767  | .03766  |        |       |         |
|                  |       | Random Effects |      |         |         | .264646 | -1.13868 | 1.13868 |        |       | .109171 |
| WMS-General      | WHITE |                | 1304 | .04781  | .834169 | .023100 | .00249   | .09312  | -2.115 | 2.016 |         |
|                  | BLACK |                | 236  | -.31916 | .814937 | .053048 | -.42367  | -.21465 | -2.040 | 1.299 |         |
|                  | OTHER |                | 95   | .13660  | .766012 | .078591 | -.01944  | .29264  | -1.745 | 1.809 |         |
|                  | Total |                | 1635 | .00000  | .837718 | .020718 | -.04064  | .04063  | -2.115 | 2.016 |         |
|                  | Model | Fixed Effects  |      |         | .827641 | .020468 | -.04015  | .04014  |        |       |         |
|                  |       | Random Effects |      |         |         | .181714 | -.78186  | .78185  |        |       | .049373 |

**Supplemental Table 10**  
**ANOVA on Factor Scores by Race**

|                     |                |               |         |         |         |         |         |        |       |         |
|---------------------|----------------|---------------|---------|---------|---------|---------|---------|--------|-------|---------|
| Visual Repro        | WHITE          | 1304          | .04599  | .845577 | .023416 | .00005  | .09193  | -2.273 | 2.332 |         |
|                     | BLACK          | 236           | -.31927 | .831988 | .054158 | -.42597 | -.21257 | -2.192 | 1.791 |         |
|                     | OTHER          | 95            | .16188  | .699633 | .071781 | .01936  | .30441  | -1.547 | 1.845 |         |
|                     | Total          | 1635          | .00000  | .846054 | .020924 | -.04104 | .04104  | -2.273 | 2.332 |         |
|                     | Mod el         | Fixed Effects |         |         | .835900 | .020673 | -.04055 | .04055 |       |         |
|                     | Random Effects |               |         |         | .183315 | -.78874 | .78874  |        |       | .050245 |
| Logical Memory      | WHITE          | 1304          | .06115  | .972991 | .026944 | .00829  | .11401  | -2.021 | 2.443 |         |
|                     | BLACK          | 236           | -.33759 | .909044 | .059174 | -.45417 | -.22101 | -2.024 | 1.569 |         |
|                     | OTHER          | 95            | -.00054 | .965112 | .099018 | -.19714 | .19607  | -1.975 | 2.026 |         |
|                     | Total          | 1635          | .00001  | .973042 | .024064 | -.04719 | .04721  | -2.024 | 2.443 |         |
|                     | Mod el         | Fixed Effects |         |         | .963588 | .023830 | -.04673 | .04675 |       |         |
|                     | Random Effects |               |         |         | .190089 | -.81788 | .81790  |        |       | .053863 |
| Verbal Paired Assoc | WHITE          | 1304          | .03876  | .735507 | .020368 | -.00120 | .07872  | -2.274 | 1.870 |         |
|                     | BLACK          | 236           | -.28095 | .742261 | .048317 | -.37614 | -.18576 | -2.264 | 1.480 |         |
|                     | OTHER          | 95            | .16587  | .731522 | .075053 | .01686  | .31489  | -1.669 | 1.697 |         |
|                     | Total          | 1635          | .00000  | .745390 | .018434 | -.03616 | .03616  | -2.274 | 1.870 |         |
|                     | Mod el         | Fixed Effects |         |         | .736254 | .018208 | -.03571 | .03571 |       |         |
|                     | Random Effects |               |         |         | .163174 | -.70208 | .70208  |        |       | .039821 |
| Recognition         | WHITE          | 1304          | -.01328 | .727538 | .020147 | -.05280 | .02625  | -4.409 | 1.450 |         |
|                     | BLACK          | 236           | -.02073 | .706028 | .045959 | -.11127 | .06981  | -1.941 | 1.284 |         |
|                     | OTHER          | 95            | .23377  | .631011 | .064740 | .10522  | .36231  | -1.963 | 1.203 |         |

**Supplemental Table 10**  
**ANOVA on Factor Scores by Race**

|                |                   |      |         |         |         |         |         |        |       |         |
|----------------|-------------------|------|---------|---------|---------|---------|---------|--------|-------|---------|
|                | Total             | 1635 | .00000  | .721155 | .017835 | -.03498 | .03498  | -4.409 | 1.450 |         |
|                | Mod<br>el         |      |         | .719248 | .017788 | -.03489 | .03489  |        |       |         |
|                | Fixed<br>Effects  |      |         |         |         |         |         |        |       |         |
|                | Random<br>Effects |      |         |         | .075181 | -.32348 | .32348  |        |       | .008081 |
| CVLT-General   | WHITE             | 505  | .06679  | .996870 | .044360 | -.02036 | .15395  | -2.593 | 2.131 |         |
|                | BLACK             | 46   | -.59576 | .872991 | .128716 | -.85501 | -.33651 | -2.602 | .766  |         |
|                | OTHER             | 106  | -.05971 | .801391 | .077838 | -.21405 | .09463  | -2.561 | 1.853 |         |
|                | Total             | 657  | -.00001 | .973377 | .037975 | -.07457 | .07456  | -2.602 | 2.131 |         |
|                | Mod<br>el         |      |         | .959882 | .037449 | -.07354 | .07353  |        |       |         |
|                | Fixed<br>Effects  |      |         |         |         |         |         |        |       |         |
|                | Random<br>Effects |      |         |         | .210290 | -.90481 | .90480  |        |       | .068870 |
| Attention      | WHITE             | 505  | .07089  | .902865 | .040177 | -.00804 | .14983  | -2.764 | 2.304 |         |
|                | BLACK             | 46   | -.51435 | .895805 | .132079 | -.78037 | -.24833 | -2.532 | 1.282 |         |
|                | OTHER             | 106  | -.11458 | .810372 | .078710 | -.27064 | .04149  | -2.753 | 1.679 |         |
|                | Total             | 657  | -.00001 | .900548 | .035134 | -.06900 | .06898  | -2.764 | 2.304 |         |
|                | Mod<br>el         |      |         | .888173 | .034651 | -.06805 | .06803  |        |       |         |
|                | Fixed<br>Effects  |      |         |         |         |         |         |        |       |         |
|                | Random<br>Effects |      |         |         | .193729 | -.83356 | .83354  |        |       | .058433 |
| Learning Effic | WHITE             | 505  | .06418  | .992358 | .044159 | -.02258 | .15094  | -2.543 | 2.141 |         |
|                | BLACK             | 46   | -.57430 | .842211 | .124177 | -.82441 | -.32420 | -2.517 | .836  |         |
|                | OTHER             | 106  | -.05649 | .834092 | .081014 | -.21713 | .10415  | -2.600 | 1.709 |         |
|                | Total             | 657  | .00000  | .971299 | .037894 | -.07440 | .07441  | -2.600 | 2.141 |         |
|                | Mod<br>el         |      |         | .958859 | .037409 | -.07345 | .07346  |        |       |         |
|                | Fixed<br>Effects  |      |         |         |         |         |         |        |       |         |

**Supplemental Table 10**  
**ANOVA on Factor Scores by Race**

|                   |                |               |         |          |         |         |         |        |       |         |
|-------------------|----------------|---------------|---------|----------|---------|---------|---------|--------|-------|---------|
|                   | Random Effects |               |         |          | .202009 | -.86917 | .86918  |        |       | .063383 |
| Recall-Recog      | WHITE          | 505           | .06577  | 1.012851 | .045071 | -.02278 | .15432  | -2.566 | 2.178 |         |
|                   | BLACK          | 46            | -.60139 | .878424  | .129517 | -.86225 | -.34053 | -2.575 | .761  |         |
|                   | OTHER          | 106           | -.05235 | .807263  | .078408 | -.20782 | .10312  | -2.431 | 1.891 |         |
|                   | Total          | 657           | .00000  | .987188  | .038514 | -.07562 | .07563  | -2.575 | 2.178 |         |
|                   | Mod el         | Fixed Effects |         |          | .973805 | .037992 | -.07460 | .07460 |       |         |
|                   | Random Effects |               |         |          | .210984 | -.90779 | .90779  |        |       | .069274 |
| Inaccurate Memory | WHITE          | 505           | .04730  | .931951  | .041471 | -.03418 | .12877  | -2.793 | 1.753 |         |
|                   | BLACK          | 46            | -.43502 | .983806  | .145054 | -.72718 | -.14287 | -2.296 | 1.267 |         |
|                   | OTHER          | 106           | -.03652 | .804914  | .078180 | -.19154 | .11850  | -2.319 | 1.433 |         |
|                   | Total          | 657           | .00000  | .923358  | .036024 | -.07073 | .07074  | -2.793 | 1.753 |         |
|                   | Mod el         | Fixed Effects |         |          | .916484 | .035755 | -.07021 | .07021 |       |         |
|                   | Random Effects |               |         |          | .148441 | -.63869 | .63870  |        |       | .033384 |
| D-KEFS-General    | WHITE          | 385           | .03762  | .863742  | .044020 | -.04893 | .12417  | -2.462 | 1.947 |         |
|                   | BLACK          | 44            | -.37375 | .725201  | .109328 | -.59423 | -.15327 | -2.222 | 1.256 |         |
|                   | OTHER          | 106           | .01858  | .850534  | .082611 | -.14523 | .18238  | -2.159 | 1.425 |         |
|                   | Total          | 535           | .00002  | .856550  | .037032 | -.07273 | .07276  | -2.462 | 1.947 |         |
|                   | Mod el         | Fixed Effects |         |          | .850758 | .036781 | -.07224 | .07227 |       |         |
|                   | Random Effects |               |         |          | .118802 | -.51115 | .51118  |        |       | .022631 |
| Color Word Interf | WHITE          | 385           | .06705  | 1.762798 | .089840 | -.10959 | .24369  | -5.055 | 4.158 |         |

**Supplemental Table 10**  
**ANOVA on Factor Scores by Race**

|                      |                   |                   |              |          |          |          |          |             |        |         |         |
|----------------------|-------------------|-------------------|--------------|----------|----------|----------|----------|-------------|--------|---------|---------|
|                      | BLACK             | 44                | -.76391      | 1.637479 | .246859  | -1.26175 | -.26607  | -4.882      | 2.377  |         |         |
|                      | OTHER             | 106               | .07363       | 1.892227 | .183789  | -.29079  | .43805   | -4.824      | 3.206  |         |         |
|                      | Total             | 535               | .00001       | 1.790789 | .077423  | -.15208  | .15210   | -5.055      | 4.158  |         |         |
|                      | Mod<br>el         | Fixed<br>Effects  |              |          | 1.779433 | .076932  | -.15111  | .15114      |        |         |         |
|                      |                   | Random<br>Effects |              |          |          | .241328  | -1.03834 | 1.03836     |        |         | .092786 |
| Trail Making         | WHITE             | 385               | .06286       | 1.374208 | .070036  | -.07484  | .20056   | -5.046      | 2.954  |         |         |
|                      | BLACK             | 44                | -.45264      | 1.219570 | .183857  | -.82342  | -.08185  | -3.371      | 2.370  |         |         |
|                      | OTHER             | 106               | -.04042      | 1.417700 | .137699  | -.31346  | .23261   | -3.756      | 2.380  |         |         |
|                      | Total             | 535               | .00000       | 1.375866 | .059484  | -.11685  | .11685   | -5.046      | 2.954  |         |         |
|                      | Mod<br>el         | Fixed<br>Effects  |              |          | 1.371129 | .059279  | -.11645  | .11645      |        |         |         |
|                      | Random<br>Effects |                   |              |          | .142509  | -.61316  | .61317   |             |        | .029784 |         |
| Verbal Fluency       | WHITE             | 385               | .04134       | 1.146345 | .058423  | -.07353  | .15620   | -2.913      | 3.157  |         |         |
|                      | BLACK             | 44                | -.49870      | 1.021279 | .153964  | -.80920  | -.18821  | -2.359      | 2.426  |         |         |
|                      | OTHER             | 106               | .05689       | .954698  | .092728  | -.12698  | .24075   | -2.621      | 2.646  |         |         |
|                      | Total             | 535               | .00000       | 1.109301 | .047959  | -.09421  | .09421   | -2.913      | 3.157  |         |         |
|                      | Mod<br>el         | Fixed<br>Effects  |              |          | 1.101237 | .047611  | -.09353  | .09353      |        |         |         |
|                      | Random<br>Effects |                   |              |          | .158967  | -.68398  | .68398   |             |        | .040795 |         |
| Inhibition-Switching | WHITE             | 385               | .25237       | 5.774518 | .294297  | -.32627  | .83100   | -<br>16.244 | 12.806 |         |         |
|                      | BLACK             | 44                | -<br>2.50761 | 4.802467 | .723999  | -3.96770 | -1.04753 | -<br>14.789 | 8.550  |         |         |

**Supplemental Table 10**  
**ANOVA on Factor Scores by Race**

|       |                |     |        |          |         |          |         |   |        |          |
|-------|----------------|-----|--------|----------|---------|----------|---------|---|--------|----------|
| OTHER |                | 106 | .12451 | 5.675412 | .551245 | -.96851  | 1.21753 | - | 9.526  |          |
| Total |                | 535 | .00004 | 5.721561 | .247365 | -.48588  | .48597  | - | 12.806 |          |
| Model | Fixed Effects  |     |        | 5.682436 | .245673 | -.48256  | .48265  |   |        |          |
|       | Random Effects |     |        |          | .797602 | -3.43176 | 3.43185 |   |        | 1.021161 |

**Tests of Homogeneity of Variances**

|                      |                                      | Levene Statistic | df1 | df2      | Sig. |
|----------------------|--------------------------------------|------------------|-----|----------|------|
| WAIS-General         | Based on Mean                        | 3.773            | 2   | 1908     | .023 |
|                      | Based on Median                      | 3.689            | 2   | 1908     | .025 |
|                      | Based on Median and with adjusted df | 3.689            | 2   | 1874.839 | .025 |
|                      | Based on trimmed mean                | 3.716            | 2   | 1908     | .024 |
| Verbal Comprehension | Based on Mean                        | .745             | 2   | 1908     | .475 |
|                      | Based on Median                      | .729             | 2   | 1908     | .482 |
|                      | Based on Median and with adjusted df | .729             | 2   | 1884.749 | .482 |
|                      | Based on trimmed mean                | .736             | 2   | 1908     | .479 |
| Perceptual Reasoning | Based on Mean                        | 4.161            | 2   | 1908     | .016 |
|                      | Based on Median                      | 4.219            | 2   | 1908     | .015 |
|                      | Based on Median and with adjusted df | 4.219            | 2   | 1872.537 | .015 |

**Supplemental Table 10**  
*ANOVA on Factor Scores by Race*

|                     |                                      |       |   |          |      |
|---------------------|--------------------------------------|-------|---|----------|------|
|                     | Based on trimmed mean                | 4.129 | 2 | 1908     | .016 |
| Working Memory      | Based on Mean                        | 4.322 | 2 | 1908     | .013 |
|                     | Based on Median                      | 4.334 | 2 | 1908     | .013 |
|                     | Based on Median and with adjusted df | 4.334 | 2 | 1880.613 | .013 |
|                     | Based on trimmed mean                | 4.296 | 2 | 1908     | .014 |
| Processing Speed    | Based on Mean                        | 3.929 | 2 | 1908     | .020 |
|                     | Based on Median                      | 3.811 | 2 | 1908     | .022 |
|                     | Based on Median and with adjusted df | 3.811 | 2 | 1888.019 | .022 |
|                     | Based on trimmed mean                | 3.874 | 2 | 1908     | .021 |
| WMS-General         | Based on Mean                        | .575  | 2 | 1632     | .563 |
|                     | Based on Median                      | .553  | 2 | 1632     | .575 |
|                     | Based on Median and with adjusted df | .553  | 2 | 1627.680 | .575 |
|                     | Based on trimmed mean                | .561  | 2 | 1632     | .571 |
| Visual Repro        | Based on Mean                        | 2.704 | 2 | 1632     | .067 |
|                     | Based on Median                      | 2.446 | 2 | 1632     | .087 |
|                     | Based on Median and with adjusted df | 2.446 | 2 | 1618.425 | .087 |
|                     | Based on trimmed mean                | 2.689 | 2 | 1632     | .068 |
| Logical Memory      | Based on Mean                        | .663  | 2 | 1632     | .516 |
|                     | Based on Median                      | .742  | 2 | 1632     | .476 |
|                     | Based on Median and with adjusted df | .742  | 2 | 1626.954 | .476 |
|                     | Based on trimmed mean                | .660  | 2 | 1632     | .517 |
| Verbal Paired Assoc | Based on Mean                        | .257  | 2 | 1632     | .774 |



**Supplemental Table 10**  
**ANOVA on Factor Scores by Race**

|                |                                      |       |   |          |      |
|----------------|--------------------------------------|-------|---|----------|------|
|                | Based on Median                      | .189  | 2 | 1632     | .828 |
|                | Based on Median and with adjusted df | .189  | 2 | 1631.661 | .828 |
|                | Based on trimmed mean                | .247  | 2 | 1632     | .782 |
| Recognition    | Based on Mean                        | 2.895 | 2 | 1632     | .056 |
|                | Based on Median                      | 3.758 | 2 | 1632     | .024 |
|                | Based on Median and with adjusted df | 3.758 | 2 | 1630.424 | .024 |
|                | Based on trimmed mean                | 3.160 | 2 | 1632     | .043 |
| CVLT-General   | Based on Mean                        | 5.943 | 2 | 654      | .003 |
|                | Based on Median                      | 5.711 | 2 | 654      | .003 |
|                | Based on Median and with adjusted df | 5.711 | 2 | 648.919  | .003 |
|                | Based on trimmed mean                | 5.922 | 2 | 654      | .003 |
| Attention      | Based on Mean                        | .885  | 2 | 654      | .413 |
|                | Based on Median                      | .830  | 2 | 654      | .436 |
|                | Based on Median and with adjusted df | .830  | 2 | 650.830  | .436 |
|                | Based on trimmed mean                | .853  | 2 | 654      | .427 |
| Learning Effic | Based on Mean                        | 3.837 | 2 | 654      | .022 |
|                | Based on Median                      | 4.003 | 2 | 654      | .019 |
|                | Based on Median and with adjusted df | 4.003 | 2 | 649.670  | .019 |
|                | Based on trimmed mean                | 3.937 | 2 | 654      | .020 |
| Recall-Recog   | Based on Mean                        | 6.581 | 2 | 654      | .001 |
|                | Based on Median                      | 6.548 | 2 | 654      | .002 |

**Supplemental Table 10**  
*ANOVA on Factor Scores by Race*

|                   |                                      |       |   |         |      |
|-------------------|--------------------------------------|-------|---|---------|------|
|                   | Based on Median and with adjusted df | 6.548 | 2 | 649.636 | .002 |
|                   | Based on trimmed mean                | 6.536 | 2 | 654     | .002 |
| Inaccurate Memory | Based on Mean                        | 4.129 | 2 | 654     | .017 |
|                   | Based on Median                      | 3.751 | 2 | 654     | .024 |
|                   | Based on Median and with adjusted df | 3.751 | 2 | 652.894 | .024 |
|                   | Based on trimmed mean                | 3.955 | 2 | 654     | .020 |
| D-KEFS-General    | Based on Mean                        | 1.257 | 2 | 532     | .285 |
|                   | Based on Median                      | 1.166 | 2 | 532     | .312 |
|                   | Based on Median and with adjusted df | 1.166 | 2 | 524.781 | .312 |
|                   | Based on trimmed mean                | 1.203 | 2 | 532     | .301 |
| Color Word Interf | Based on Mean                        | .551  | 2 | 532     | .577 |
|                   | Based on Median                      | .219  | 2 | 532     | .803 |
|                   | Based on Median and with adjusted df | .219  | 2 | 513.015 | .803 |
|                   | Based on trimmed mean                | .421  | 2 | 532     | .657 |
| Trail Making      | Based on Mean                        | .621  | 2 | 532     | .538 |
|                   | Based on Median                      | .466  | 2 | 532     | .628 |
|                   | Based on Median and with adjusted df | .466  | 2 | 527.435 | .628 |
|                   | Based on trimmed mean                | .539  | 2 | 532     | .583 |
| Verbal Fluency    | Based on Mean                        | 3.294 | 2 | 532     | .038 |
|                   | Based on Median                      | 3.223 | 2 | 532     | .041 |
|                   | Based on Median and with adjusted df | 3.223 | 2 | 523.520 | .041 |

**Supplemental Table 10**  
**ANOVA on Factor Scores by Race**

|                      |                                      |       |   |         |      |
|----------------------|--------------------------------------|-------|---|---------|------|
|                      | Based on trimmed mean                | 3.299 | 2 | 532     | .038 |
| Inhibition-Switching | Based on Mean                        | 1.376 | 2 | 532     | .253 |
|                      | Based on Median                      | 1.298 | 2 | 532     | .274 |
|                      | Based on Median and with adjusted df | 1.298 | 2 | 524.668 | .274 |
|                      | Based on trimmed mean                | 1.338 | 2 | 532     | .263 |

**ANOVA**

|                      |                | Sum of Squares | df   | Mean Square | F       | Sig. |
|----------------------|----------------|----------------|------|-------------|---------|------|
| WAIS-General         | Between Groups | 127.522        | 2    | 63.761      | 85.839  | .000 |
|                      | Within Groups  | 1417.266       | 1908 | .743        |         |      |
|                      | Total          | 1544.788       | 1910 |             |         |      |
| Verbal Comprehension | Between Groups | 152.907        | 2    | 76.453      | 102.528 | .000 |
|                      | Within Groups  | 1422.764       | 1908 | .746        |         |      |
|                      | Total          | 1575.670       | 1910 |             |         |      |
| Perceptual Reasoning | Between Groups | 128.923        | 2    | 64.461      | 88.780  | .000 |
|                      | Within Groups  | 1385.358       | 1908 | .726        |         |      |
|                      | Total          | 1514.281       | 1910 |             |         |      |
| Working Memory       | Between Groups | 104.525        | 2    | 52.262      | 72.226  | .000 |
|                      | Within Groups  | 1380.629       | 1908 | .724        |         |      |
|                      | Total          | 1485.154       | 1910 |             |         |      |
| Processing Speed     | Between Groups | 76.899         | 2    | 38.449      | 54.548  | .000 |
|                      | Within Groups  | 1344.897       | 1908 | .705        |         |      |
|                      | Total          | 1421.796       | 1910 |             |         |      |
| WMS-General          | Between Groups | 28.792         | 2    | 14.396      | 21.016  | .000 |

**Supplemental Table 10**  
**ANOVA on Factor Scores by Race**

|                     |                |          |      |        |        |      |
|---------------------|----------------|----------|------|--------|--------|------|
|                     | Within Groups  | 1117.902 | 1632 | .685   |        |      |
|                     | Total          | 1146.694 | 1634 |        |        |      |
| Visual Repro        | Between Groups | 29.304   | 2    | 14.652 | 20.969 | .000 |
|                     | Within Groups  | 1140.325 | 1632 | .699   |        |      |
|                     | Total          | 1169.629 | 1634 |        |        |      |
| Logical Memory      | Between Groups | 31.773   | 2    | 15.886 | 17.110 | .000 |
|                     | Within Groups  | 1515.316 | 1632 | .929   |        |      |
|                     | Total          | 1547.088 | 1634 |        |        |      |
| Verbal Paired Assoc | Between Groups | 23.201   | 2    | 11.601 | 21.400 | .000 |
|                     | Within Groups  | 884.659  | 1632 | .542   |        |      |
|                     | Total          | 907.860  | 1634 |        |        |      |
| Recognition         | Between Groups | 5.523    | 2    | 2.761  | 5.338  | .005 |
|                     | Within Groups  | 844.263  | 1632 | .517   |        |      |
|                     | Total          | 849.785  | 1634 |        |        |      |
| CVLT-General        | Between Groups | 18.958   | 2    | 9.479  | 10.288 | .000 |
|                     | Within Groups  | 602.578  | 654  | .921   |        |      |
|                     | Total          | 621.536  | 656  |        |        |      |
| Attention           | Between Groups | 16.099   | 2    | 8.049  | 10.204 | .000 |
|                     | Within Groups  | 515.908  | 654  | .789   |        |      |
|                     | Total          | 532.007  | 656  |        |        |      |
| Learning Effic      | Between Groups | 17.590   | 2    | 8.795  | 9.566  | .000 |
|                     | Within Groups  | 601.295  | 654  | .919   |        |      |
|                     | Total          | 618.885  | 656  |        |        |      |
| Recall-Recog        | Between Groups | 19.112   | 2    | 9.556  | 10.077 | .000 |
|                     | Within Groups  | 620.186  | 654  | .948   |        |      |
|                     | Total          | 639.298  | 656  |        |        |      |
| Inaccurate Memory   | Between Groups | 9.976    | 2    | 4.988  | 5.939  | .003 |

**Supplemental Table 10**  
**ANOVA on Factor Scores by Race**

|                      |                |           |     |         |       |      |
|----------------------|----------------|-----------|-----|---------|-------|------|
|                      | Within Groups  | 549.323   | 654 | .840    |       |      |
|                      | Total          | 559.299   | 656 |         |       |      |
| D-KEFS-General       | Between Groups | 6.728     | 2   | 3.364   | 4.648 | .010 |
|                      | Within Groups  | 385.056   | 532 | .724    |       |      |
|                      | Total          | 391.784   | 534 |         |       |      |
| Color Word Interf    | Between Groups | 27.982    | 2   | 13.991  | 4.419 | .012 |
|                      | Within Groups  | 1684.515  | 532 | 3.166   |       |      |
|                      | Total          | 1712.497  | 534 |         |       |      |
| Trail Making         | Between Groups | 10.709    | 2   | 5.355   | 2.848 | .059 |
|                      | Within Groups  | 1000.157  | 532 | 1.880   |       |      |
|                      | Total          | 1010.866  | 534 |         |       |      |
| Verbal Fluency       | Between Groups | 11.944    | 2   | 5.972   | 4.924 | .008 |
|                      | Within Groups  | 645.169   | 532 | 1.213   |       |      |
|                      | Total          | 657.113   | 534 |         |       |      |
| Inhibition-Switching | Between Groups | 302.841   | 2   | 151.420 | 4.689 | .010 |
|                      | Within Groups  | 17178.321 | 532 | 32.290  |       |      |
|                      | Total          | 17481.162 | 534 |         |       |      |

**ANOVA Effect Sizes<sup>a,b</sup>**

|              |                            | Point Estimate | 95% Confidence Interval |       |
|--------------|----------------------------|----------------|-------------------------|-------|
|              |                            |                | Lower                   | Upper |
| WAIS-General | Eta-squared                | .083           | .060                    | .106  |
|              | Epsilon-squared            | .082           | .059                    | .105  |
|              | Omega-squared Fixed-effect | .082           | .059                    | .105  |

**Supplemental Table 10**  
*ANOVA on Factor Scores by Race*

|                      |                             |      |      |      |
|----------------------|-----------------------------|------|------|------|
|                      | Omega-squared Random-effect | .043 | .030 | .056 |
| Verbal Comprehension | Eta-squared                 | .097 | .073 | .122 |
|                      | Epsilon-squared             | .096 | .072 | .121 |
|                      | Omega-squared Fixed-effect  | .096 | .072 | .121 |
|                      | Omega-squared Random-effect | .050 | .037 | .064 |
| Perceptual Reasoning | Eta-squared                 | .085 | .062 | .109 |
|                      | Epsilon-squared             | .084 | .061 | .108 |
|                      | Omega-squared Fixed-effect  | .084 | .061 | .108 |
|                      | Omega-squared Random-effect | .044 | .032 | .057 |
| Working Memory       | Eta-squared                 | .070 | .049 | .093 |
|                      | Epsilon-squared             | .069 | .048 | .092 |
|                      | Omega-squared Fixed-effect  | .069 | .048 | .092 |
|                      | Omega-squared Random-effect | .036 | .025 | .048 |
| Processing Speed     | Eta-squared                 | .054 | .036 | .074 |
|                      | Epsilon-squared             | .053 | .035 | .073 |
|                      | Omega-squared Fixed-effect  | .053 | .035 | .073 |
|                      | Omega-squared Random-effect | .027 | .018 | .038 |
| WMS-General          | Eta-squared                 | .025 | .012 | .041 |
|                      | Epsilon-squared             | .024 | .011 | .040 |

**Supplemental Table 10**  
*ANOVA on Factor Scores by Race*

|                     |                             |      |       |      |
|---------------------|-----------------------------|------|-------|------|
|                     | Omega-squared Fixed-effect  | .024 | .011  | .040 |
|                     | Omega-squared Random-effect | .012 | .005  | .020 |
| Visual Repro        | Eta-squared                 | .025 | .012  | .041 |
|                     | Epsilon-squared             | .024 | .011  | .040 |
|                     | Omega-squared Fixed-effect  | .024 | .011  | .040 |
|                     | Omega-squared Random-effect | .012 | .005  | .020 |
| Logical Memory      | Eta-squared                 | .021 | .009  | .035 |
|                     | Epsilon-squared             | .019 | .007  | .034 |
|                     | Omega-squared Fixed-effect  | .019 | .007  | .034 |
|                     | Omega-squared Random-effect | .010 | .004  | .017 |
| Verbal Paired Assoc | Eta-squared                 | .026 | .012  | .042 |
|                     | Epsilon-squared             | .024 | .011  | .041 |
|                     | Omega-squared Fixed-effect  | .024 | .011  | .041 |
|                     | Omega-squared Random-effect | .012 | .005  | .021 |
| Recognition         | Eta-squared                 | .006 | .001  | .016 |
|                     | Epsilon-squared             | .005 | -.001 | .014 |
|                     | Omega-squared Fixed-effect  | .005 | -.001 | .014 |
|                     | Omega-squared Random-effect | .003 | .000  | .007 |

**Supplemental Table 10**  
*ANOVA on Factor Scores by Race*

|                   |                             |      |       |      |
|-------------------|-----------------------------|------|-------|------|
| CVLT-General      | Eta-squared                 | .031 | .009  | .059 |
|                   | Epsilon-squared             | .028 | .006  | .056 |
|                   | Omega-squared Fixed-effect  | .027 | .006  | .056 |
|                   | Omega-squared Random-effect | .014 | .003  | .029 |
| Attention         | Eta-squared                 | .030 | .009  | .059 |
|                   | Epsilon-squared             | .027 | .006  | .056 |
|                   | Omega-squared Fixed-effect  | .027 | .006  | .056 |
|                   | Omega-squared Random-effect | .014 | .003  | .029 |
| Learning Effic    | Eta-squared                 | .028 | .008  | .056 |
|                   | Epsilon-squared             | .025 | .005  | .053 |
|                   | Omega-squared Fixed-effect  | .025 | .005  | .053 |
|                   | Omega-squared Random-effect | .013 | .002  | .027 |
| Recall-Recog      | Eta-squared                 | .030 | .008  | .058 |
|                   | Epsilon-squared             | .027 | .005  | .055 |
|                   | Omega-squared Fixed-effect  | .027 | .005  | .055 |
|                   | Omega-squared Random-effect | .014 | .003  | .028 |
| Inaccurate Memory | Eta-squared                 | .018 | .002  | .041 |
|                   | Epsilon-squared             | .015 | -.001 | .038 |
|                   | Omega-squared Fixed-effect  | .015 | -.001 | .038 |



**Supplemental Table 10**  
**ANOVA on Factor Scores by Race**

|                      |                             |      |       |      |
|----------------------|-----------------------------|------|-------|------|
|                      | Omega-squared Random-effect | .007 | .000  | .019 |
| D-KEFS-General       | Eta-squared                 | .017 | .001  | .043 |
|                      | Epsilon-squared             | .013 | -.003 | .039 |
|                      | Omega-squared Fixed-effect  | .013 | -.003 | .039 |
|                      | Omega-squared Random-effect | .007 | -.001 | .020 |
| Color Word Interf    | Eta-squared                 | .016 | .001  | .041 |
|                      | Epsilon-squared             | .013 | -.003 | .038 |
|                      | Omega-squared Fixed-effect  | .013 | -.003 | .038 |
|                      | Omega-squared Random-effect | .006 | -.001 | .019 |
| Trail Making         | Eta-squared                 | .011 | .000  | .032 |
|                      | Epsilon-squared             | .007 | -.004 | .028 |
|                      | Omega-squared Fixed-effect  | .007 | -.004 | .028 |
|                      | Omega-squared Random-effect | .003 | -.002 | .014 |
| Verbal Fluency       | Eta-squared                 | .018 | .001  | .044 |
|                      | Epsilon-squared             | .014 | -.002 | .041 |
|                      | Omega-squared Fixed-effect  | .014 | -.002 | .041 |
|                      | Omega-squared Random-effect | .007 | -.001 | .021 |
| Inhibition-Switching | Eta-squared                 | .017 | .001  | .043 |
|                      | Epsilon-squared             | .014 | -.003 | .039 |

**Supplemental Table 10**  
**ANOVA on Factor Scores by Race**

|                             |      |       |      |
|-----------------------------|------|-------|------|
| Omega-squared Fixed-effect  | .014 | -.003 | .039 |
| Omega-squared Random-effect | .007 | -.001 | .020 |

- a. Eta-squared and Epsilon-squared are estimated based on the fixed-effect model.  
b. Negative but less biased estimates are retained, not rounded to zero.

**Robust Tests of Equality of Means**

|                      |       | Statistic <sup>a</sup> | df1 | df2     | Sig. |
|----------------------|-------|------------------------|-----|---------|------|
| WAIS-General         | Welch | 104.494                | 2   | 327.402 | .000 |
| Verbal Comprehension | Welch | 118.095                | 2   | 319.363 | .000 |
| Perceptual Reasoning | Welch | 109.024                | 2   | 328.965 | .000 |
| Working Memory       | Welch | 88.429                 | 2   | 327.353 | .000 |
| Processing Speed     | Welch | 61.170                 | 2   | 328.930 | .000 |
| WMS-General          | Welch | 21.683                 | 2   | 215.628 | .000 |
| Visual Repro         | Welch | 21.774                 | 2   | 220.144 | .000 |
| Logical Memory       | Welch | 18.749                 | 2   | 213.830 | .000 |
| Verbal Paired Assoc  | Welch | 21.091                 | 2   | 211.869 | .000 |
| Recognition          | Welch | 6.790                  | 2   | 218.231 | .001 |
| CVLT-General         | Welch | 11.970                 | 2   | 108.298 | .000 |
| Attention            | Welch | 10.124                 | 2   | 104.041 | .000 |
| Learning Effic       | Welch | 11.807                 | 2   | 108.453 | .000 |
| Recall-Recog         | Welch | 11.894                 | 2   | 108.656 | .000 |
| Inaccurate Memory    | Welch | 5.222                  | 2   | 103.457 | .007 |
| D-KEFS-General       | Welch | 6.140                  | 2   | 107.821 | .003 |

**Supplemental Table 10**  
**ANOVA on Factor Scores by Race**

|                      |       |       |   |         |      |
|----------------------|-------|-------|---|---------|------|
| Color Word Interf    | Welch | 5.102 | 2 | 103.900 | .008 |
| Trail Making         | Welch | 3.442 | 2 | 105.614 | .036 |
| Verbal Fluency       | Welch | 5.644 | 2 | 108.038 | .005 |
| Inhibition-Switching | Welch | 6.289 | 2 | 108.148 | .003 |

a. Asymptotically F distributed.

**Post Hoc Tests**

**Multiple Comparisons**

| Dependent Variable |            | (I)<br>RACEGRO<br>UP | (J)<br>RACEGRO<br>UP | Mean<br>Difference<br>(I-J) | Std.<br>Error | Sig.  | 99.75% Confidence<br>Interval |                |
|--------------------|------------|----------------------|----------------------|-----------------------------|---------------|-------|-------------------------------|----------------|
|                    |            |                      |                      |                             |               |       | Lower<br>Bound                | Upper<br>Bound |
| WAIS-General       | LSD        | WHITE                | BLACK                | .750337*                    | .057534       | .000  | .57616                        | .92451         |
|                    |            |                      | OTHER                | .020281                     | .073592       | .783  | -.20251                       | .24307         |
|                    |            | BLACK                | WHITE                | -.750337*                   | .057534       | .000  | -.92451                       | -.57616        |
|                    |            |                      | OTHER                | -.730056*                   | .087937       | .000  | -.99627                       | -.46384        |
|                    | Bonferroni | OTHER                | WHITE                | -.020281                    | .073592       | .783  | -.24307                       | .20251         |
|                    |            |                      | BLACK                | .730056*                    | .087937       | .000  | .46384                        | .99627         |
|                    |            | WHITE                | BLACK                | .750337*                    | .057534       | .000  | .55778                        | .94289         |
|                    |            |                      | OTHER                | .020281                     | .073592       | 1.000 | -.22602                       | .26658         |

**Supplemental Table 10**  
**ANOVA on Factor Scores by Race**

|            |                         |              |           |           |           |          |          |          |         |
|------------|-------------------------|--------------|-----------|-----------|-----------|----------|----------|----------|---------|
|            | Dunnett<br>C            | BLACK        | WHITE     | -.750337* | .057534   | .000     | -.94289  | -.55778  |         |
|            |                         |              | OTHER     | -.730056* | .087937   | .000     | -1.02436 | -.43575  |         |
|            |                         | OTHER        | WHITE     | -.020281  | .073592   | 1.000    | -.26658  | .22602   |         |
|            |                         |              | BLACK     | .730056*  | .087937   | .000     | .43575   | 1.02436  |         |
|            |                         | WHITE        | BLACK     | .750337*  | .052263   |          | .57463   | .92605   |         |
|            |                         |              | OTHER     | .020281   | .068697   |          | -.21262  | .25319   |         |
|            |                         | BLACK        | WHITE     | -.750337* | .052263   |          | -.92605  | -.57463  |         |
|            |                         |              | OTHER     | -.730056* | .080034   |          | -1.00113 | -.45898  |         |
|            |                         | OTHER        | WHITE     | -.020281  | .068697   |          | -.25319  | .21262   |         |
|            |                         |              | BLACK     | .730056*  | .080034   |          | .45898   | 1.00113  |         |
|            | Verbal<br>Comprehension | LSD          | WHITE     | BLACK     | .816507*  | .057646  | .000     | .64199   | .99102  |
|            |                         |              |           | OTHER     | -.031629  | .073734  | .668     | -.25485  | .19159  |
|            |                         |              | BLACK     | WHITE     | -.816507* | .057646  | .000     | -.99102  | -.64199 |
|            |                         |              |           | OTHER     | -.848136* | .088107  | .000     | -1.11487 | -.58140 |
| OTHER      |                         |              | WHITE     | .031629   | .073734   | .668     | -.19159  | .25485   |         |
|            |                         |              | BLACK     | .848136*  | .088107   | .000     | .58140   | 1.11487  |         |
| Bonferroni |                         |              | WHITE     | BLACK     | .816507*  | .057646  | .000     | .62358   | 1.00944 |
|            |                         |              |           | OTHER     | -.031629  | .073734  | 1.000    | -.27840  | .21515  |
|            |                         | BLACK        | WHITE     | -.816507* | .057646   | .000     | -1.00944 | -.62358  |         |
|            |                         |              | OTHER     | -.848136* | .088107   | .000     | -1.14301 | -.55326  |         |
|            |                         | OTHER        | WHITE     | .031629   | .073734   | 1.000    | -.21515  | .27840   |         |
|            |                         |              | BLACK     | .848136*  | .088107   | .000     | .55326   | 1.14301  |         |
|            |                         | Dunnett<br>C | WHITE     | BLACK     | .816507*  | .053744  |          | .63579   | .99722  |
|            |                         |              |           | OTHER     | -.031629  | .073496  |          | -.28087  | .21762  |
| BLACK      | WHITE                   |              | -.816507* | .053744   |           | -.99722  | -.63579  |          |         |
|            | OTHER                   |              | -.848136* | .085231   |           | -1.13686 | -.55942  |          |         |
| OTHER      | WHITE                   |              | .031629   | .073496   |           | -.21762  | .28087   |          |         |
|            |                         |              |           |           |           |          |          |          |         |

**Supplemental Table 10**  
**ANOVA on Factor Scores by Race**

|                      |            |            |       |           |           |         |         |          |         |
|----------------------|------------|------------|-------|-----------|-----------|---------|---------|----------|---------|
|                      |            |            | BLACK | .848136*  | .085231   |         | .55942  | 1.13686  |         |
| Perceptual Reasoning | LSD        | WHITE      | BLACK | .755049*  | .056883   | .000    | .58284  | .92725   |         |
|                      |            |            | OTHER | .028776   | .072759   | .693    | -.19149 | .24904   |         |
|                      |            |            | BLACK | WHITE     | -.755049* | .056883 | .000    | -.92725  | -.58284 |
|                      |            | OTHER      | WHITE | -.028776  | .072759   | .693    | -.24904 | .19149   |         |
|                      |            |            | BLACK | .726274*  | .086941   | .000    | .46307  | .98948   |         |
|                      |            |            | OTHER | WHITE     | -.028776  | .072759 | 1.000   | -.21473  | .27229  |
|                      | Bonferroni | BLACK      | WHITE | -.755049* | .056883   | .000    | -.94543 | -.56467  |         |
|                      |            |            | OTHER | WHITE     | -.726274* | .086941 | .000    | -1.01725 | -.43530 |
|                      |            |            | OTHER | WHITE     | -.028776  | .072759 | 1.000   | -.27229  | .21473  |
|                      |            | Dunnett C  | BLACK | .726274*  | .086941   | .000    | .43530  | 1.01725  |         |
|                      |            |            | WHITE | BLACK     | .755049*  | .051452 |         | .58207   | .92803  |
|                      |            |            | OTHER | .028776   | .067084   |         | -.19865 | .25620   |         |
| Working Memory       | LSD        | BLACK      | WHITE | -.755049* | .051452   |         | -.92803 | -.58207  |         |
|                      |            |            | OTHER | WHITE     | -.726274* | .078243 |         | -.99127  | -.46127 |
|                      |            |            | OTHER | WHITE     | -.028776  | .067084 |         | -.25620  | .19865  |
|                      |            | Bonferroni | BLACK | .726274*  | .078243   |         | .46127  | .99127   |         |
|                      |            |            | WHITE | BLACK     | .680652*  | .056786 | .000    | .50874   | .85256  |
|                      |            |            | OTHER | .038464   | .072634   | .596    | -.18143 | .25835   |         |
|                      | Bonferroni | BLACK      | WHITE | -.680652* | .056786   | .000    | -.85256 | -.50874  |         |
|                      |            |            | OTHER | WHITE     | -.642189* | .086793 | .000    | -.90494  | -.37944 |
|                      |            |            | OTHER | WHITE     | -.038464  | .072634 | .596    | -.25835  | .18143  |
|                      |            | Bonferroni | BLACK | .642189*  | .086793   | .000    | .37944  | .90494   |         |
|                      |            |            | WHITE | BLACK     | .680652*  | .056786 | .000    | .49060   | .87070  |
|                      |            |            | OTHER | .038464   | .072634   | 1.000   | -.20463 | .28156   |         |

**Supplemental Table 10**  
**ANOVA on Factor Scores by Race**

|            |                     |              |           |           |           |         |         |         |         |
|------------|---------------------|--------------|-----------|-----------|-----------|---------|---------|---------|---------|
|            | Dunnett<br>C        | BLACK        | WHITE     | -.680652* | .056786   | .000    | -.87070 | -.49060 |         |
|            |                     |              | OTHER     | -.642189* | .086793   | .000    | -.93267 | -.35171 |         |
|            |                     | OTHER        | WHITE     | -.038464  | .072634   | 1.000   | -.28156 | .20463  |         |
|            |                     |              | BLACK     | .642189*  | .086793   | .000    | .35171  | .93267  |         |
|            |                     | WHITE        | BLACK     | .680652*  | .051405   |         | .50783  | .85348  |         |
|            |                     |              | OTHER     | .038464   | .068067   |         | -.19231 | .26923  |         |
|            |                     | BLACK        | WHITE     | -.680652* | .051405   |         | -.85348 | -.50783 |         |
|            |                     |              | OTHER     | -.642189* | .079101   |         | -.91011 | -.37427 |         |
|            |                     | OTHER        | WHITE     | -.038464  | .068067   |         | -.26923 | .19231  |         |
|            |                     |              | BLACK     | .642189*  | .079101   |         | .37427  | .91011  |         |
|            | Processing<br>Speed | LSD          | WHITE     | BLACK     | .581127*  | .056046 | .000    | .41146  | .75080  |
|            |                     |              |           | OTHER     | -.002452  | .071688 | .973    | -.21948 | .21457  |
|            |                     |              | BLACK     | WHITE     | -.581127* | .056046 | .000    | -.75080 | -.41146 |
|            |                     |              |           | OTHER     | -.583578* | .085662 | .000    | -.84291 | -.32425 |
| OTHER      |                     |              | WHITE     | .002452   | .071688   | .973    | -.21457 | .21948  |         |
|            |                     |              | BLACK     | .583578*  | .085662   | .000    | .32425  | .84291  |         |
| Bonferroni |                     |              | WHITE     | BLACK     | .581127*  | .056046 | .000    | .39355  | .76870  |
|            |                     |              |           | OTHER     | -.002452  | .071688 | 1.000   | -.24238 | .23748  |
|            |                     | BLACK        | WHITE     | -.581127* | .056046   | .000    | -.76870 | -.39355 |         |
|            |                     |              | OTHER     | -.583578* | .085662   | .000    | -.87027 | -.29688 |         |
|            |                     | OTHER        | WHITE     | .002452   | .071688   | 1.000   | -.23748 | .24238  |         |
|            |                     |              | BLACK     | .583578*  | .085662   | .000    | .29688  | .87027  |         |
|            |                     | Dunnett<br>C | WHITE     | BLACK     | .581127*  | .053087 |         | .40262  | .75963  |
|            |                     |              |           | OTHER     | -.002452  | .063432 |         | -.21746 | .21256  |
| BLACK      | WHITE               |              | -.581127* | .053087   |           | -.75963 | -.40262 |         |         |
|            | OTHER               |              | -.583578* | .076518   |           | -.84263 | -.32453 |         |         |
|            | OTHER               | WHITE        | .002452   | .063432   |           | -.21256 | .21746  |         |         |

**Supplemental Table 10**  
**ANOVA on Factor Scores by Race**

|              |            |       |           |           |           |         |         |         |
|--------------|------------|-------|-----------|-----------|-----------|---------|---------|---------|
|              |            |       | BLACK     | .583578*  | .076518   |         | .32453  | .84263  |
| WMS-General  | LSD        | WHITE | BLACK     | .366962*  | .058547   | .000    | .18968  | .54425  |
|              |            |       | OTHER     | -.088795  | .087953   | .313    | -.35512 | .17753  |
|              |            |       | BLACK     | WHITE     | -.366962* | .058547 | .000    | -.54425 |
|              |            | OTHER | OTHER     | -.455757* | .100563   | .000    | -.76027 | -.15125 |
|              |            |       | WHITE     | .088795   | .087953   | .313    | -.17753 | .35512  |
|              |            |       | BLACK     | .455757*  | .100563   | .000    | .15125  | .76027  |
|              | Bonferroni | WHITE | BLACK     | .366962*  | .058547   | .000    | .17096  | .56296  |
|              |            |       | OTHER     | -.088795  | .087953   | .939    | -.38324 | .20565  |
|              |            |       | BLACK     | WHITE     | -.366962* | .058547 | .000    | -.56296 |
|              |            | OTHER | OTHER     | -.455757* | .100563   | .000    | -.79241 | -.11910 |
|              |            |       | WHITE     | .088795   | .087953   | .939    | -.20565 | .38324  |
|              |            |       | BLACK     | .455757*  | .100563   | .000    | .11910  | .79241  |
| Dunnett C    | WHITE      | BLACK | .366962*  | .057859   |           | .17215  | .56177  |         |
|              |            | OTHER | -.088795  | .081916   |           | -.36976 | .19217  |         |
|              |            | BLACK | WHITE     | -.366962* | .057859   |         | -.56177 | -.17215 |
|              | OTHER      | OTHER | -.455757* | .094819   |           | -.77979 | -.13172 |         |
|              |            | WHITE | .088795   | .081916   |           | -.19217 | .36976  |         |
|              |            | BLACK | .455757*  | .094819   |           | .13172  | .77979  |         |
| Visual Repro | LSD        | WHITE | BLACK     | .365259*  | .059132   | .000    | .18621  | .54431  |
|              |            |       | OTHER     | -.115896  | .088831   | .192    | -.38488 | .15309  |
|              |            |       | BLACK     | WHITE     | -.365259* | .059132 | .000    | -.54431 |
|              |            | OTHER | OTHER     | -.481155* | .101566   | .000    | -.78870 | -.17361 |
|              |            |       | WHITE     | .115896   | .088831   | .192    | -.15309 | .38488  |
|              |            |       | BLACK     | .481155*  | .101566   | .000    | .17361  | .78870  |
|              | Bonferroni | WHITE | BLACK     | .365259*  | .059132   | .000    | .16730  | .56321  |
|              |            |       | OTHER     | -.115896  | .088831   | .577    | -.41328 | .18148  |

**Supplemental Table 10**  
**ANOVA on Factor Scores by Race**

|                |              |       |       |           |         |       |         |         |
|----------------|--------------|-------|-------|-----------|---------|-------|---------|---------|
|                |              | BLACK | WHITE | -.365259* | .059132 | .000  | -.56321 | -.16730 |
|                |              |       | OTHER | -.481155* | .101566 | .000  | -.82117 | -.14114 |
|                |              | OTHER | WHITE | .115896   | .088831 | .577  | -.18148 | .41328  |
|                |              |       | BLACK | .481155*  | .101566 | .000  | .14114  | .82117  |
|                | Dunnett<br>C | WHITE | BLACK | .365259*  | .059003 |       | .16659  | .56393  |
|                |              |       | OTHER | -.115896  | .075504 |       | -.37474 | .14295  |
|                |              | BLACK | WHITE | -.365259* | .059003 |       | -.56393 | -.16659 |
|                |              |       | OTHER | -.481155* | .089920 |       | -.78816 | -.17415 |
|                |              | OTHER | WHITE | .115896   | .075504 |       | -.14295 | .37474  |
|                |              |       | BLACK | .481155*  | .089920 |       | .17415  | .78816  |
| Logical Memory | LSD          | WHITE | BLACK | .398743*  | .068164 | .000  | .19234  | .60515  |
|                |              |       | OTHER | .061686   | .102400 | .547  | -.24839 | .37176  |
|                |              | BLACK | WHITE | -.398743* | .068164 | .000  | -.60515 | -.19234 |
|                |              |       | OTHER | -.337056  | .117081 | .004  | -.69158 | .01747  |
|                |              | OTHER | WHITE | -.061686  | .102400 | .547  | -.37176 | .24839  |
|                |              |       | BLACK | .337056   | .117081 | .004  | -.01747 | .69158  |
|                | Bonferroni   | WHITE | BLACK | .398743*  | .068164 | .000  | .17055  | .62694  |
|                |              |       | OTHER | .061686   | .102400 | 1.000 | -.28112 | .40449  |
|                |              | BLACK | WHITE | -.398743* | .068164 | .000  | -.62694 | -.17055 |
|                |              |       | OTHER | -.337056  | .117081 | .012  | -.72901 | .05490  |
|                |              | OTHER | WHITE | -.061686  | .102400 | 1.000 | -.40449 | .28112  |
|                |              |       | BLACK | .337056   | .117081 | .012  | -.05490 | .72901  |
|                | Dunnett<br>C | WHITE | BLACK | .398743*  | .065020 |       | .17985  | .61764  |
|                |              |       | OTHER | .061686   | .102619 |       | -.29039 | .41377  |
|                |              | BLACK | WHITE | -.398743* | .065020 |       | -.61764 | -.17985 |
|                |              |       | OTHER | -.337056  | .115352 |       | -.73164 | .05753  |
|                |              | OTHER | WHITE | -.061686  | .102619 |       | -.41377 | .29039  |



**Supplemental Table 10**  
**ANOVA on Factor Scores by Race**

|                        |            |       |           |           |         |         |         |         |
|------------------------|------------|-------|-----------|-----------|---------|---------|---------|---------|
|                        |            |       | BLACK     | .337056   | .115352 |         | -.05753 | .73164  |
| Verbal Paired<br>Assoc | LSD        | WHITE | BLACK     | .319711*  | .052083 | .000    | .16200  | .47742  |
|                        |            |       | OTHER     | -.127112  | .078241 | .104    | -.36403 | .10981  |
|                        |            | BLACK | WHITE     | -.319711* | .052083 | .000    | -.47742 | -.16200 |
|                        |            |       | OTHER     | -.446823* | .089459 | .000    | -.71771 | -.17594 |
|                        |            | OTHER | WHITE     | .127112   | .078241 | .104    | -.10981 | .36403  |
|                        |            |       | BLACK     | .446823*  | .089459 | .000    | .17594  | .71771  |
|                        | Bonferroni | WHITE | BLACK     | .319711*  | .052083 | .000    | .14535  | .49407  |
|                        |            |       | OTHER     | -.127112  | .078241 | .313    | -.38904 | .13482  |
|                        |            | BLACK | WHITE     | -.319711* | .052083 | .000    | -.49407 | -.14535 |
|                        |            |       | OTHER     | -.446823* | .089459 | .000    | -.74631 | -.14734 |
|                        |            | OTHER | WHITE     | .127112   | .078241 | .313    | -.13482 | .38904  |
|                        |            |       | BLACK     | .446823*  | .089459 | .000    | .14734  | .74631  |
| Dunnett<br>C           | WHITE      | BLACK | .319711*  | .052435   |         | .14315  | .49627  |         |
|                        |            | OTHER | -.127112  | .077767   |         | -.39393 | .13971  |         |
|                        | BLACK      | WHITE | -.319711* | .052435   |         | -.49627 | -.14315 |         |
|                        |            | OTHER | -.446823* | .089260   |         | -.75198 | -.14167 |         |
|                        | OTHER      | WHITE | .127112   | .077767   |         | -.13971 | .39393  |         |
|                        |            | BLACK | .446823*  | .089260   |         | .14167  | .75198  |         |
| Recognition            | LSD        | WHITE | BLACK     | .007452   | .050880 | .884    | -.14661 | .16152  |
|                        |            |       | OTHER     | -.247045* | .076434 | .001    | -.47849 | -.01560 |
|                        |            | BLACK | WHITE     | -.007452  | .050880 | .884    | -.16152 | .14661  |
|                        |            |       | OTHER     | -.254497  | .087393 | .004    | -.51913 | .01013  |
|                        |            | OTHER | WHITE     | .247045*  | .076434 | .001    | .01560  | .47849  |
|                        |            |       | BLACK     | .254497   | .087393 | .004    | -.01013 | .51913  |
|                        | Bonferroni | WHITE | BLACK     | .007452   | .050880 | 1.000   | -.16288 | .17778  |
|                        |            |       | OTHER     | -.247045  | .076434 | .004    | -.50292 | .00883  |

**Supplemental Table 10**  
**ANOVA on Factor Scores by Race**

|              |              |       |       |           |         |       |          |         |
|--------------|--------------|-------|-------|-----------|---------|-------|----------|---------|
|              |              | BLACK | WHITE | -.007452  | .050880 | 1.000 | -.17778  | .16288  |
|              |              |       | OTHER | -.254497  | .087393 | .011  | -.54706  | .03807  |
|              |              | OTHER | WHITE | .247045   | .076434 | .004  | -.00883  | .50292  |
|              |              |       | BLACK | .254497   | .087393 | .011  | -.03807  | .54706  |
|              | Dunnett<br>C | WHITE | BLACK | .007452   | .050181 |       | -.16150  | .17641  |
|              |              |       | OTHER | -.247045* | .067803 |       | -.47954  | -.01455 |
|              |              | BLACK | WHITE | -.007452  | .050181 |       | -.17641  | .16150  |
|              |              |       | OTHER | -.254497  | .079395 |       | -.52571  | .01671  |
|              |              | OTHER | WHITE | .247045*  | .067803 |       | .01455   | .47954  |
|              |              |       | BLACK | .254497   | .079395 |       | -.01671  | .52571  |
| CVLT-General | LSD          | WHITE | BLACK | .662553*  | .147832 | .000  | .21387   | 1.11124 |
|              |              |       | OTHER | .126500   | .102551 | .218  | -.18475  | .43775  |
|              |              | BLACK | WHITE | -.662553* | .147832 | .000  | -1.11124 | -.21387 |
|              |              |       | OTHER | -.536053* | .169476 | .002  | -1.05043 | -.02168 |
|              |              | OTHER | WHITE | -.126500  | .102551 | .218  | -.43775  | .18475  |
|              |              |       | BLACK | .536053*  | .169476 | .002  | .02168   | 1.05043 |
|              | Bonferroni   | WHITE | BLACK | .662553*  | .147832 | .000  | .16627   | 1.15884 |
|              |              |       | OTHER | .126500   | .102551 | .653  | -.21777  | .47077  |
|              |              | BLACK | WHITE | -.662553* | .147832 | .000  | -1.15884 | -.16627 |
|              |              |       | OTHER | -.536053  | .169476 | .005  | -1.10500 | .03289  |
|              |              | OTHER | WHITE | -.126500  | .102551 | .653  | -.47077  | .21777  |
|              |              |       | BLACK | .536053   | .169476 | .005  | -.03289  | 1.10500 |
|              | Dunnett<br>C | WHITE | BLACK | .662553*  | .136145 |       | .18068   | 1.14442 |
|              |              |       | OTHER | .126500   | .089591 |       | -.17879  | .43179  |
|              |              | BLACK | WHITE | -.662553* | .136145 |       | -1.14442 | -.18068 |
|              |              |       | OTHER | -.536053* | .150421 |       | -1.06638 | -.00573 |
|              |              | OTHER | WHITE | -.126500  | .089591 |       | -.43179  | .17879  |

**Supplemental Table 10**  
**ANOVA on Factor Scores by Race**

|                |            |       |       |          |           |           |         |          |          |         |
|----------------|------------|-------|-------|----------|-----------|-----------|---------|----------|----------|---------|
| Attention      | LSD        | WHITE | BLACK | .536053* | .150421   |           | .00573  | 1.06638  |          |         |
|                |            |       | BLACK | .585239* | .136788   | .000      | .17007  | 1.00041  |          |         |
|                |            | BLACK | WHITE | OTHER    | .185467   | .094890   | .051    | -.10253  | .47347   |         |
|                |            |       | BLACK | WHITE    | OTHER     | -.585239* | .136788 | .000     | -1.00041 | -.17007 |
|                |            | OTHER | WHITE | BLACK    | OTHER     | -.399772  | .156815 | .011     | -.87572  | .07618  |
|                |            |       | BLACK | WHITE    | OTHER     | -.185467  | .094890 | .051     | -.47347  | .10253  |
|                | Bonferroni | WHITE | BLACK | BLACK    | .399772   | .156815   | .011    | -.07618  | .87572   |         |
|                |            |       | OTHER | WHITE    | BLACK     | .585239*  | .136788 | .000     | .12603   | 1.04445 |
|                |            | BLACK | WHITE | OTHER    | .185467   | .094890   | .153    | -.13309  | .50402   |         |
|                |            |       | BLACK | WHITE    | OTHER     | -.585239* | .136788 | .000     | -1.04445 | -.12603 |
|                |            | OTHER | WHITE | BLACK    | OTHER     | -.399772  | .156815 | .033     | -.92621  | .12667  |
|                |            |       | BLACK | WHITE    | OTHER     | -.185467  | .094890 | .153     | -.50402  | .13309  |
| Dunnett C      | WHITE      | BLACK | BLACK | .399772  | .156815   | .033      | -.12667 | .92621   |          |         |
|                |            | OTHER | WHITE | BLACK    | .585239*  | .138055   |         | .09598   | 1.07450  |         |
|                | BLACK      | WHITE | OTHER | .185467  | .088371   |           | -.11592 | .48686   |          |         |
|                |            | BLACK | WHITE | OTHER    | -.585239* | .138055   |         | -1.07450 | -.09598  |         |
|                | OTHER      | WHITE | BLACK | OTHER    | -.399772  | .153754   |         | -.94196  | .14242   |         |
|                |            | BLACK | WHITE | OTHER    | -.185467  | .088371   |         | -.48686  | .11592   |         |
| Learning Effic | LSD        | WHITE | BLACK | .638481* | .147675   | .000      | .19027  | 1.08669  |          |         |
|                |            |       | OTHER | .120667  | .102442   | .239      | -.19025 | .43159   |          |         |
|                |            | BLACK | WHITE | OTHER    | -.638481* | .147675   | .000    | -1.08669 | -.19027  |         |
|                |            |       | BLACK | WHITE    | OTHER     | -.517814* | .169295 | .002     | -1.03164 | -.00399 |
|                |            | OTHER | WHITE | BLACK    | OTHER     | -.120667  | .102442 | .239     | -.43159  | .19025  |
|                |            |       | BLACK | WHITE    | BLACK     | .517814*  | .169295 | .002     | .00399   | 1.03164 |
|                | Bonferroni | WHITE | BLACK | BLACK    | .638481*  | .147675   | .000    | .14272   | 1.13424  |         |
|                |            |       | OTHER | OTHER    | .120667   | .102442   | .718    | -.22324  | .46457   |         |

**Supplemental Table 10**  
**ANOVA on Factor Scores by Race**

|              |              |       |       |           |         |      |          |         |
|--------------|--------------|-------|-------|-----------|---------|------|----------|---------|
|              |              | BLACK | WHITE | -.638481* | .147675 | .000 | -1.13424 | -.14272 |
|              |              |       | OTHER | -.517814  | .169295 | .007 | -1.08615 | .05052  |
|              |              | OTHER | WHITE | -.120667  | .102442 | .718 | -.46457  | .22324  |
|              |              |       | BLACK | .517814   | .169295 | .007 | -.05052  | 1.08615 |
|              | Dunnett<br>C | WHITE | BLACK | .638481*  | .131795 |      | .17218   | 1.10479 |
|              |              |       | OTHER | .120667   | .092268 |      | -.19385  | .43519  |
|              |              | BLACK | WHITE | -.638481* | .131795 |      | -1.10479 | -.17218 |
|              |              |       | OTHER | -.517814  | .148268 |      | -1.03993 | .00430  |
|              |              | OTHER | WHITE | -.120667  | .092268 |      | -.43519  | .19385  |
|              |              |       | BLACK | .517814   | .148268 |      | -.00430  | 1.03993 |
| Recall-Recog | LSD          | WHITE | BLACK | .667162*  | .149977 | .000 | .21197   | 1.12236 |
|              |              |       | OTHER | .118119   | .104039 | .257 | -.19765  | .43389  |
|              |              | BLACK | WHITE | -.667162* | .149977 | .000 | -1.12236 | -.21197 |
|              |              |       | OTHER | -.549042* | .171934 | .001 | -1.07088 | -.02720 |
|              |              | OTHER | WHITE | -.118119  | .104039 | .257 | -.43389  | .19765  |
|              |              |       | BLACK | .549042*  | .171934 | .001 | .02720   | 1.07088 |
|              | Bonferroni   | WHITE | BLACK | .667162*  | .149977 | .000 | .16368   | 1.17065 |
|              |              |       | OTHER | .118119   | .104039 | .770 | -.23115  | .46739  |
|              |              | BLACK | WHITE | -.667162* | .149977 | .000 | -1.17065 | -.16368 |
|              |              |       | OTHER | -.549042  | .171934 | .004 | -1.12624 | .02816  |
|              |              | OTHER | WHITE | -.118119  | .104039 | .770 | -.46739  | .23115  |
|              |              |       | BLACK | .549042   | .171934 | .004 | -.02816  | 1.12624 |
|              | Dunnett<br>C | WHITE | BLACK | .667162*  | .137135 |      | .18184   | 1.15248 |
|              |              |       | OTHER | .118119   | .090439 |      | -.19004  | .42627  |
|              |              | BLACK | WHITE | -.667162* | .137135 |      | -1.15248 | -.18184 |
|              |              |       | OTHER | -.549042* | .151401 |      | -1.08281 | -.01527 |
|              |              | OTHER | WHITE | -.118119  | .090439 |      | -.42627  | .19004  |

**Supplemental Table 10**  
**ANOVA on Factor Scores by Race**

|                      |            |       |          |          |           |         |          |         |
|----------------------|------------|-------|----------|----------|-----------|---------|----------|---------|
|                      |            |       | BLACK    | .549042* | .151401   |         | .01527   | 1.08281 |
| Inaccurate<br>Memory | LSD        | WHITE | BLACK    | .482317* | .141149   | .001    | .05392   | .91072  |
|                      |            |       | OTHER    | .083814  | .097915   | .392    | -.21337  | .38099  |
|                      |            |       | BLACK    | WHITE    | -.482317* | .141149 | .001     | -.91072 |
|                      |            | OTHER | WHITE    | -.083814 | .097915   | .392    | -.38099  | .21337  |
|                      |            |       | BLACK    | .398503  | .161814   | .014    | -.88962  | .09262  |
|                      |            |       | OTHER    | WHITE    | -.083814  | .097915 | .392     | -.38099 |
|                      | Bonferroni | WHITE | BLACK    | .482317* | .141149   | .002    | .00847   | .95616  |
|                      |            |       | OTHER    | .083814  | .097915   | 1.000   | -.24489  | .41252  |
|                      |            |       | BLACK    | WHITE    | -.482317* | .141149 | .002     | -.95616 |
|                      |            | OTHER | WHITE    | -.083814 | .097915   | 1.000   | -.41252  | .24489  |
|                      |            |       | BLACK    | .398503  | .161814   | .042    | -.94172  | .14472  |
|                      |            |       | OTHER    | WHITE    | -.083814  | .097915 | 1.000    | -.41252 |
| Dunnett<br>C         | WHITE      | BLACK | .482317  | .150866  |           | -.05264 | 1.01727  |         |
|                      |            | OTHER | .083814  | .088499  |           | -.21792 | .38555   |         |
|                      |            | BLACK | WHITE    | -.482317 | .150866   |         | -1.01727 | .05264  |
|                      | OTHER      | WHITE | -.083814 | .088499  |           | -.38555 | .21792   |         |
|                      |            | BLACK | .398503  | .164781  |           | -.98041 | .18340   |         |
|                      |            | OTHER | WHITE    | -.083814 | .088499   |         | -.38555  | .21792  |
| D-KEFS-General       | LSD        | WHITE | BLACK    | .411373* | .135387   | .002    | .00009   | .82265  |
|                      |            |       | OTHER    | .019048  | .093318   | .838    | -.26443  | .30253  |
|                      |            |       | BLACK    | WHITE    | -.411373* | .135387 | .002     | -.82265 |
|                      |            | OTHER | WHITE    | -.019048 | .093318   | .838    | -.30253  | .26443  |
|                      |            |       | BLACK    | .392325  | .152571   | .010    | -.85581  | .07116  |
|                      |            |       | OTHER    | WHITE    | -.019048  | .093318 | .838     | -.30253 |
|                      | Bonferroni | WHITE | BLACK    | .411373  | .135387   | .007    | -.04362  | .86637  |
|                      |            |       | OTHER    | .019048  | .093318   | 1.000   | -.29456  | .33266  |
|                      |            |       | BLACK    | WHITE    | -.411373  | .135387 | .007     | -.04362 |
|                      |            | OTHER | WHITE    | -.019048 | .093318   | .838    | -.30253  | .26443  |
|                      |            |       | BLACK    | .392325  | .152571   | .010    | -.07116  | .85581  |
|                      |            |       | OTHER    | WHITE    | -.019048  | .093318 | .838     | -.30253 |

**Supplemental Table 10**  
**ANOVA on Factor Scores by Race**

|                          |       |         |          |         |         |          |         |
|--------------------------|-------|---------|----------|---------|---------|----------|---------|
| Dunnett<br>C             | BLACK | WHITE   | -.411373 | .135387 | .007    | -.86637  | .04362  |
|                          |       | OTHER   | -.392325 | .152571 | .031    | -.90507  | .12042  |
|                          | OTHER | WHITE   | -.019048 | .093318 | 1.000   | -.33266  | .29456  |
|                          |       | BLACK   | .392325  | .152571 | .031    | -.12042  | .90507  |
|                          | WHITE | BLACK   | .411373  | .117858 |         | -.00620  | .82894  |
|                          |       | OTHER   | .019048  | .093608 |         | -.30022  | .33832  |
|                          | BLACK | WHITE   | -.411373 | .117858 |         | -.82894  | .00620  |
|                          |       | OTHER   | -.392325 | .137030 |         | -.87466  | .09001  |
|                          | OTHER | WHITE   | -.019048 | .093608 |         | -.33832  | .30022  |
|                          |       | BLACK   | .392325  | .137030 |         | -.09001  | .87466  |
| Color Word Interf<br>LSD | WHITE | BLACK   | .830958  | .283174 | .003    | -.02927  | 1.69119 |
|                          |       | OTHER   | -.006583 | .195182 | .973    | -.59951  | .58634  |
|                          | BLACK | WHITE   | -.830958 | .283174 | .003    | -1.69119 | .02927  |
|                          |       | OTHER   | -.837541 | .319116 | .009    | -1.80695 | .13187  |
|                          | OTHER | WHITE   | .006583  | .195182 | .973    | -.58634  | .59951  |
|                          |       | BLACK   | .837541  | .319116 | .009    | -.13187  | 1.80695 |
|                          | WHITE | BLACK   | .830958  | .283174 | .010    | -.12070  | 1.78262 |
|                          |       | OTHER   | -.006583 | .195182 | 1.000   | -.66253  | .64936  |
|                          | BLACK | WHITE   | -.830958 | .283174 | .010    | -1.78262 | .12070  |
|                          |       | OTHER   | -.837541 | .319116 | .027    | -1.90999 | .23490  |
| OTHER                    | WHITE | .006583 | .195182  | 1.000   | -.64936 | .66253   |         |
|                          | BLACK | .837541 | .319116  | .027    | -.23490 | 1.90999  |         |
| Dunnett<br>C             | WHITE | BLACK   | .830958  | .262699 |         | -.10108  | 1.76299 |
|                          |       | OTHER   | -.006583 | .204572 |         | -.70474  | .69157  |
|                          | BLACK | WHITE   | -.830958 | .262699 |         | -1.76299 | .10108  |
|                          |       | OTHER   | -.837541 | .307763 |         | -1.92114 | .24606  |
| OTHER                    | WHITE | .006583 | .204572  |         | -.69157 | .70474   |         |



**Supplemental Table 10**  
**ANOVA on Factor Scores by Race**

|                      |            |       |       |            |          |       |          |         |
|----------------------|------------|-------|-------|------------|----------|-------|----------|---------|
|                      |            | BLACK | WHITE | -.540040   | .175248  | .006  | -1.12899 | .04891  |
|                      |            |       | OTHER | -.555591   | .197491  | .015  | -1.21930 | .10811  |
|                      |            | OTHER | WHITE | .015552    | .120792  | 1.000 | -.39039  | .42150  |
|                      |            |       | BLACK | .555591    | .197491  | .015  | -.10811  | 1.21930 |
|                      | Dunnett    | WHITE | BLACK | .540040    | .164676  |       | -.04390  | 1.12398 |
|                      | C          |       | OTHER | -.015552   | .109598  |       | -.38888  | .35778  |
|                      |            | BLACK | WHITE | -.540040   | .164676  |       | -1.12398 | .04390  |
|                      |            |       | OTHER | -.555591   | .179731  |       | -1.19080 | .07961  |
|                      |            | OTHER | WHITE | .015552    | .109598  |       | -.35778  | .38888  |
|                      |            |       | BLACK | .555591    | .179731  |       | -.07961  | 1.19080 |
| Inhibition-Switching | LSD        | WHITE | BLACK | 2.759980*  | .904287  | .002  | .01292   | 5.50703 |
|                      |            |       | OTHER | .127857    | .623293  | .838  | -1.76559 | 2.02130 |
|                      |            | BLACK | WHITE | -2.759980* | .904287  | .002  | -5.50703 | -.01292 |
|                      |            |       | OTHER | -2.632123  | 1.019063 | .010  | -5.72784 | .46360  |
|                      |            | OTHER | WHITE | -.127857   | .623293  | .838  | -2.02130 | 1.76559 |
|                      |            |       | BLACK | 2.632123   | 1.019063 | .010  | -.46360  | 5.72784 |
|                      | Bonferroni | WHITE | BLACK | 2.759980   | .904287  | .007  | -.27904  | 5.79900 |
|                      |            |       | OTHER | .127857    | .623293  | 1.000 | -1.96683 | 2.22254 |
|                      |            | BLACK | WHITE | -2.759980  | .904287  | .007  | -5.79900 | .27904  |
|                      |            |       | OTHER | -2.632123  | 1.019063 | .030  | -6.05687 | .79262  |
|                      |            | OTHER | WHITE | -.127857   | .623293  | 1.000 | -2.22254 | 1.96683 |
|                      |            |       | BLACK | 2.632123   | 1.019063 | .030  | -.79262  | 6.05687 |



**Supplemental Table 10**  
*ANOVA on Factor Scores by Race*

|              |       |       |           |         |  |          |         |
|--------------|-------|-------|-----------|---------|--|----------|---------|
| Dunnett<br>C | WHITE | BLACK | 2.759980  | .781528 |  | -.00859  | 5.52855 |
|              |       | OTHER | .127857   | .624885 |  | -2.00344 | 2.25916 |
|              | BLACK | WHITE | -2.759980 | .781528 |  | -5.52855 | .00859  |
|              |       | OTHER | -2.632123 | .909970 |  | -5.83465 | .57041  |
|              | OTHER | WHITE | -.127857  | .624885 |  | -2.25916 | 2.00344 |
|              |       | BLACK | 2.632123  | .909970 |  | -.57041  | 5.83465 |

\*. The mean difference is significant at the 0.0025 level.

## Means Plots

**Supplemental Table 10**  
*ANOVA on Factor Scores by Race*

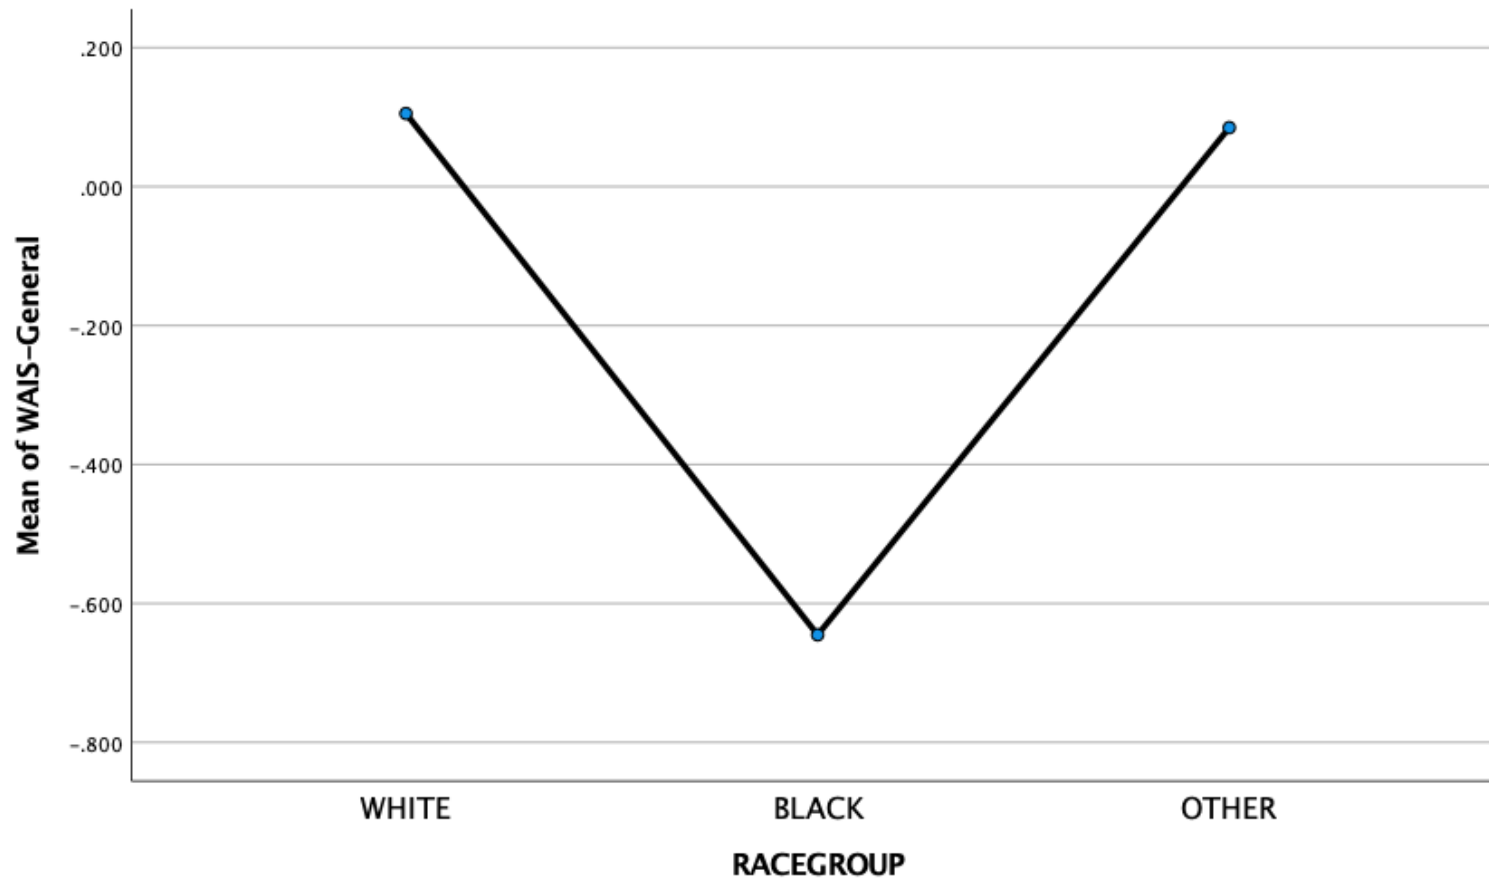

**Supplemental Table 10**  
*ANOVA on Factor Scores by Race*

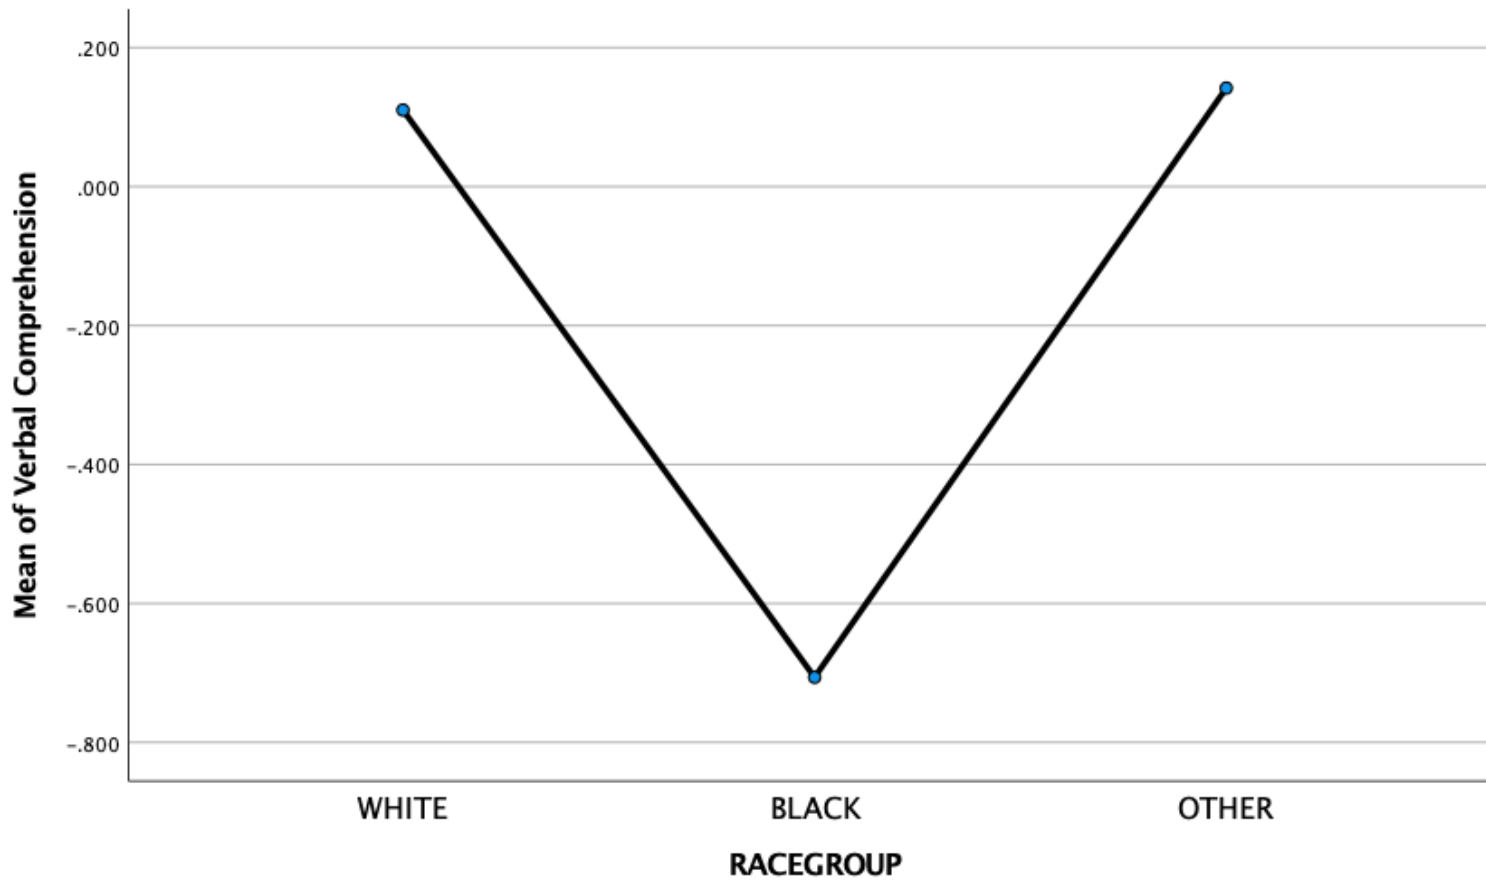

**Supplemental Table 10**  
*ANOVA on Factor Scores by Race*

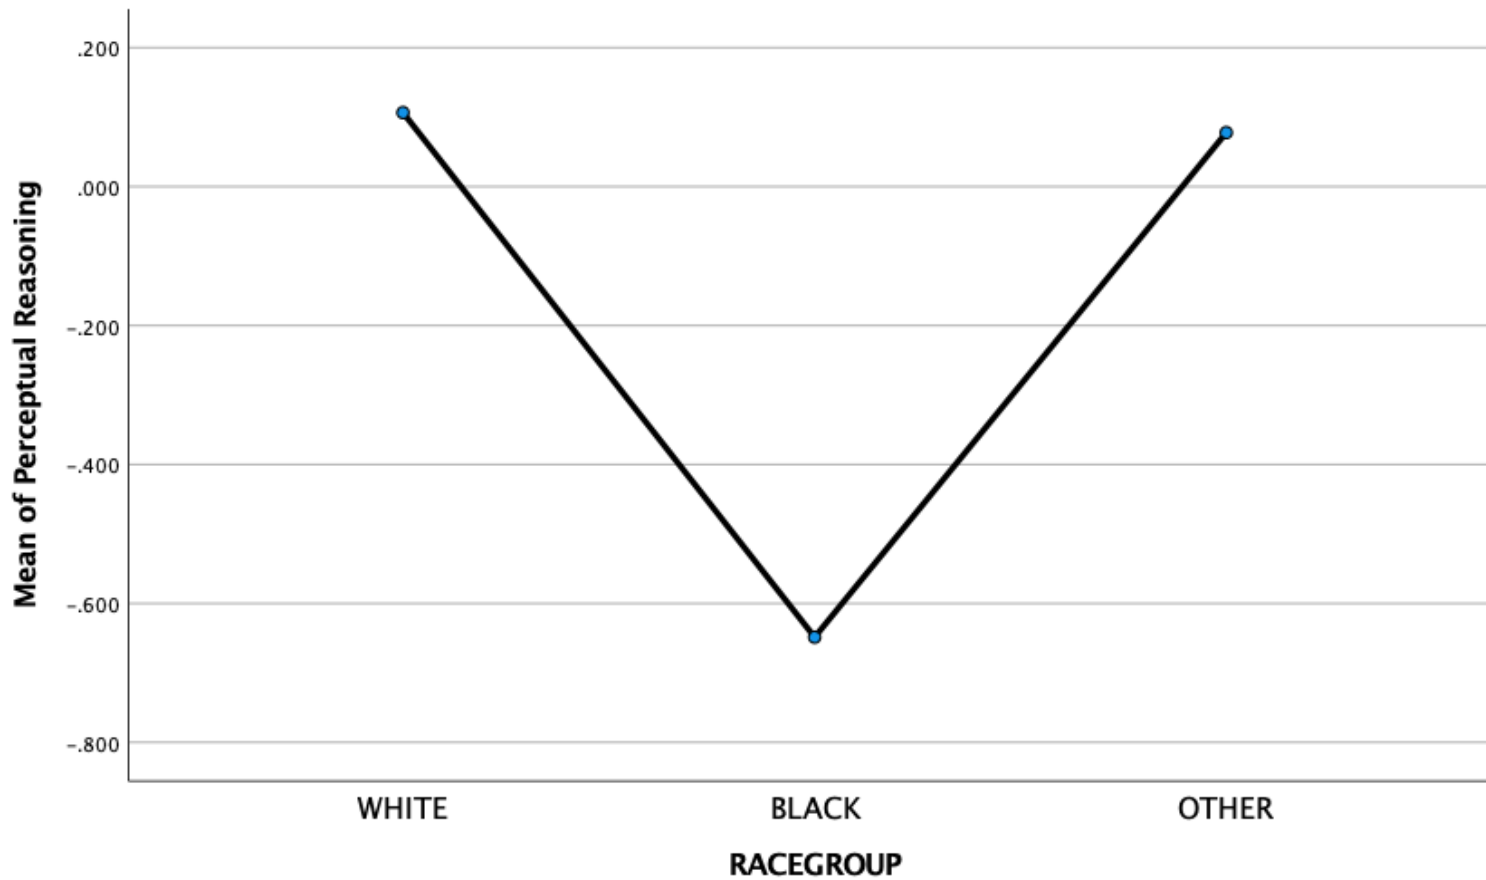

**Supplemental Table 10**  
*ANOVA on Factor Scores by Race*

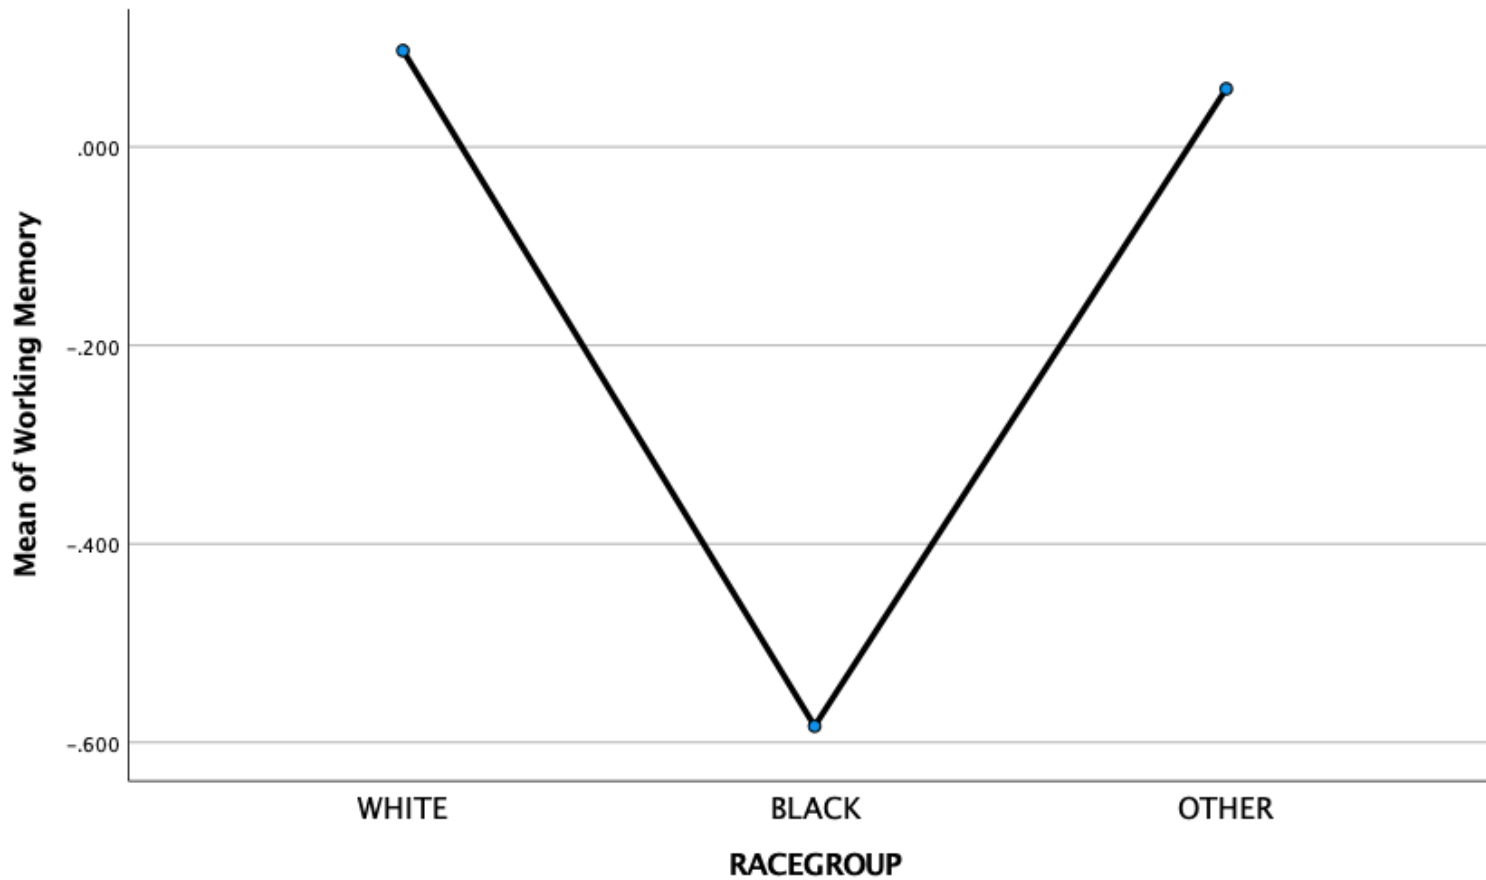

**Supplemental Table 10**  
*ANOVA on Factor Scores by Race*

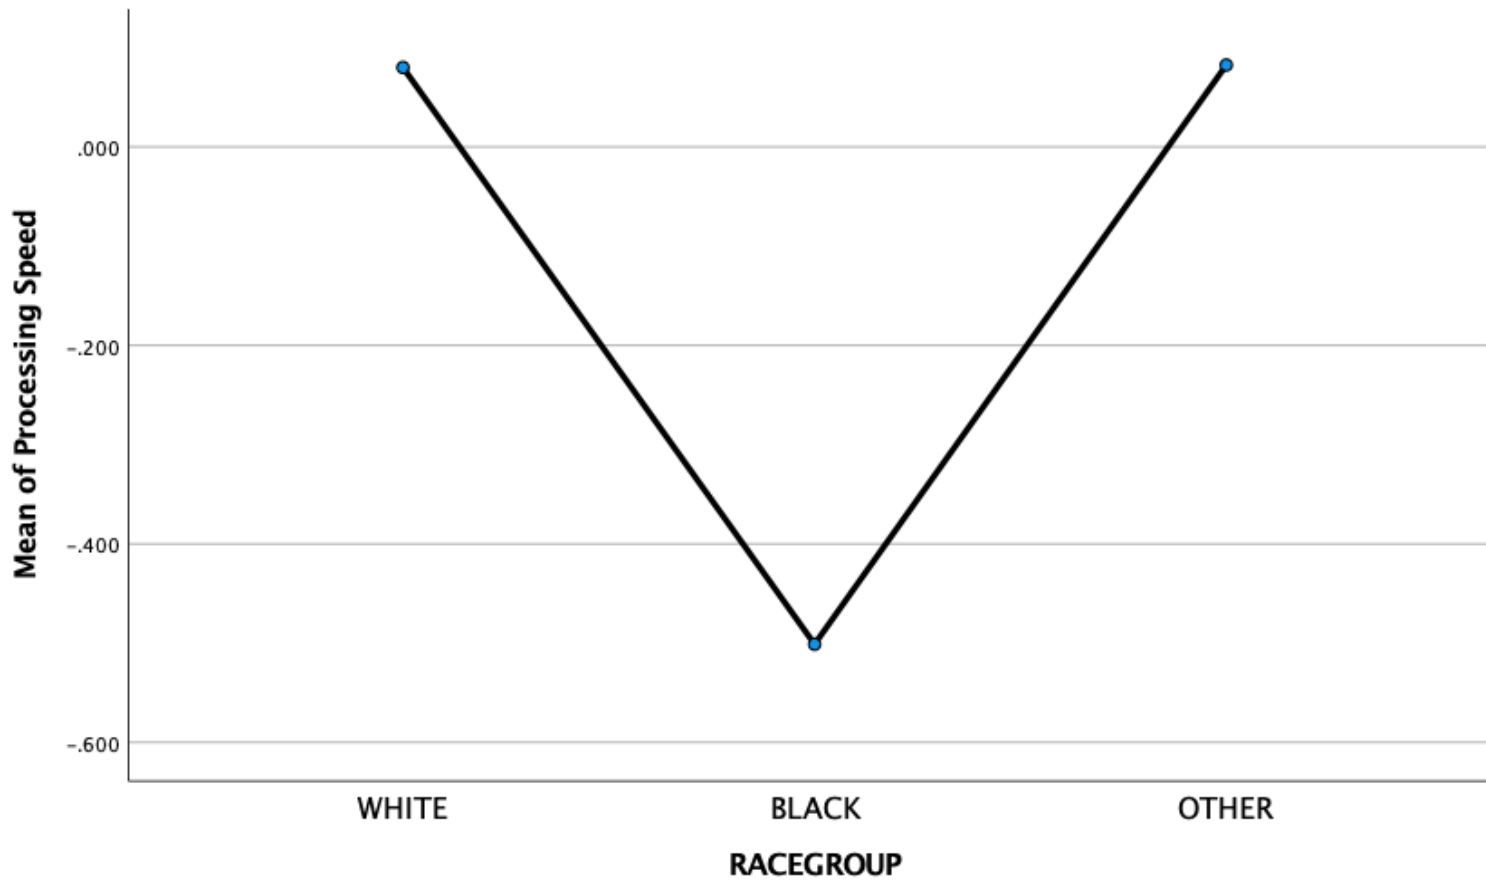

**Supplemental Table 10**  
*ANOVA on Factor Scores by Race*

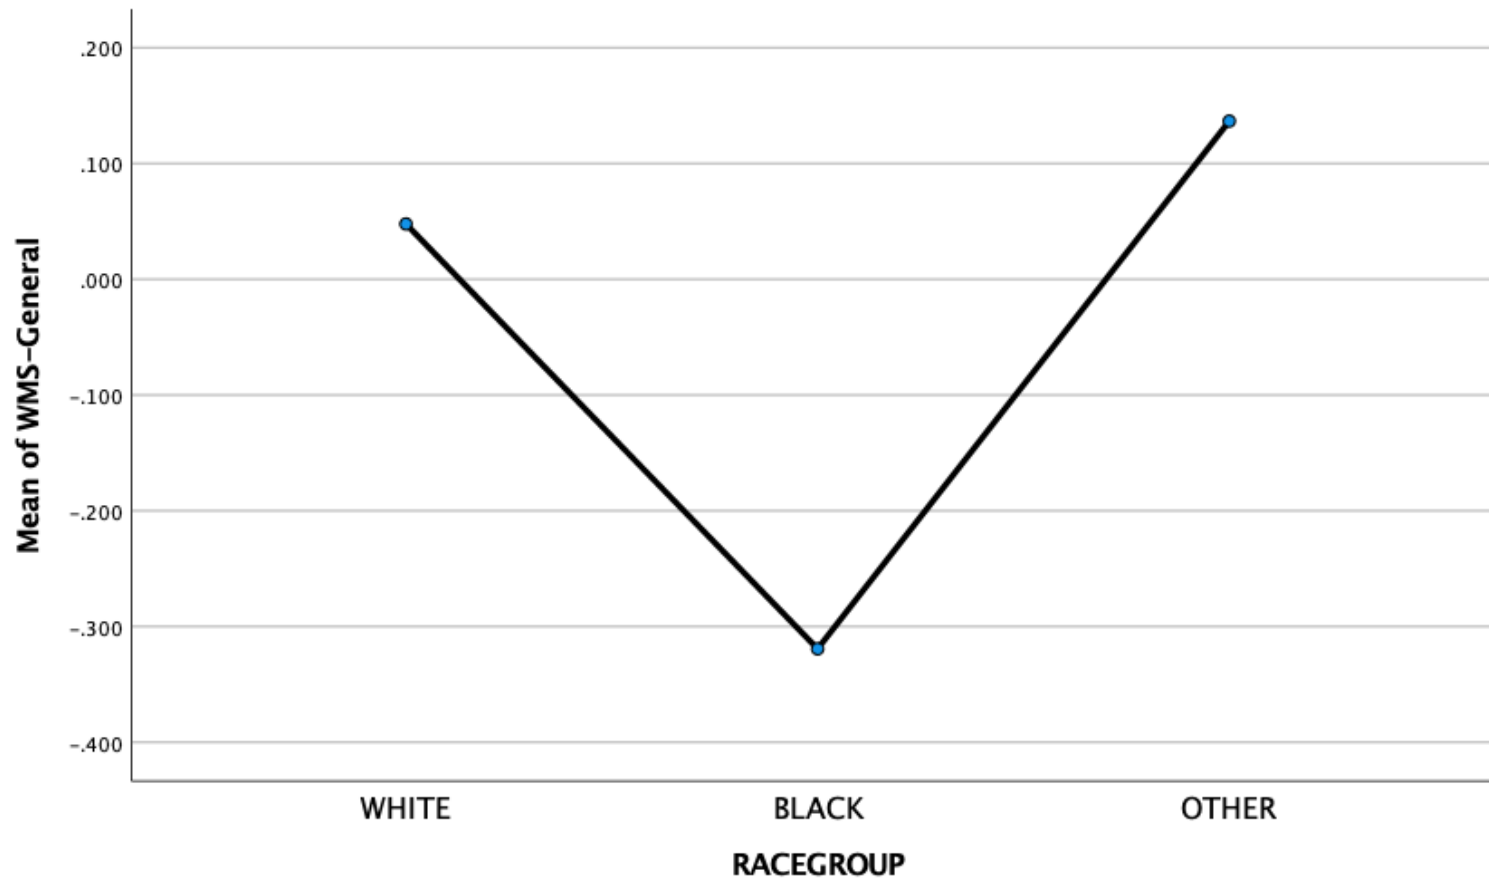

**Supplemental Table 10**  
*ANOVA on Factor Scores by Race*

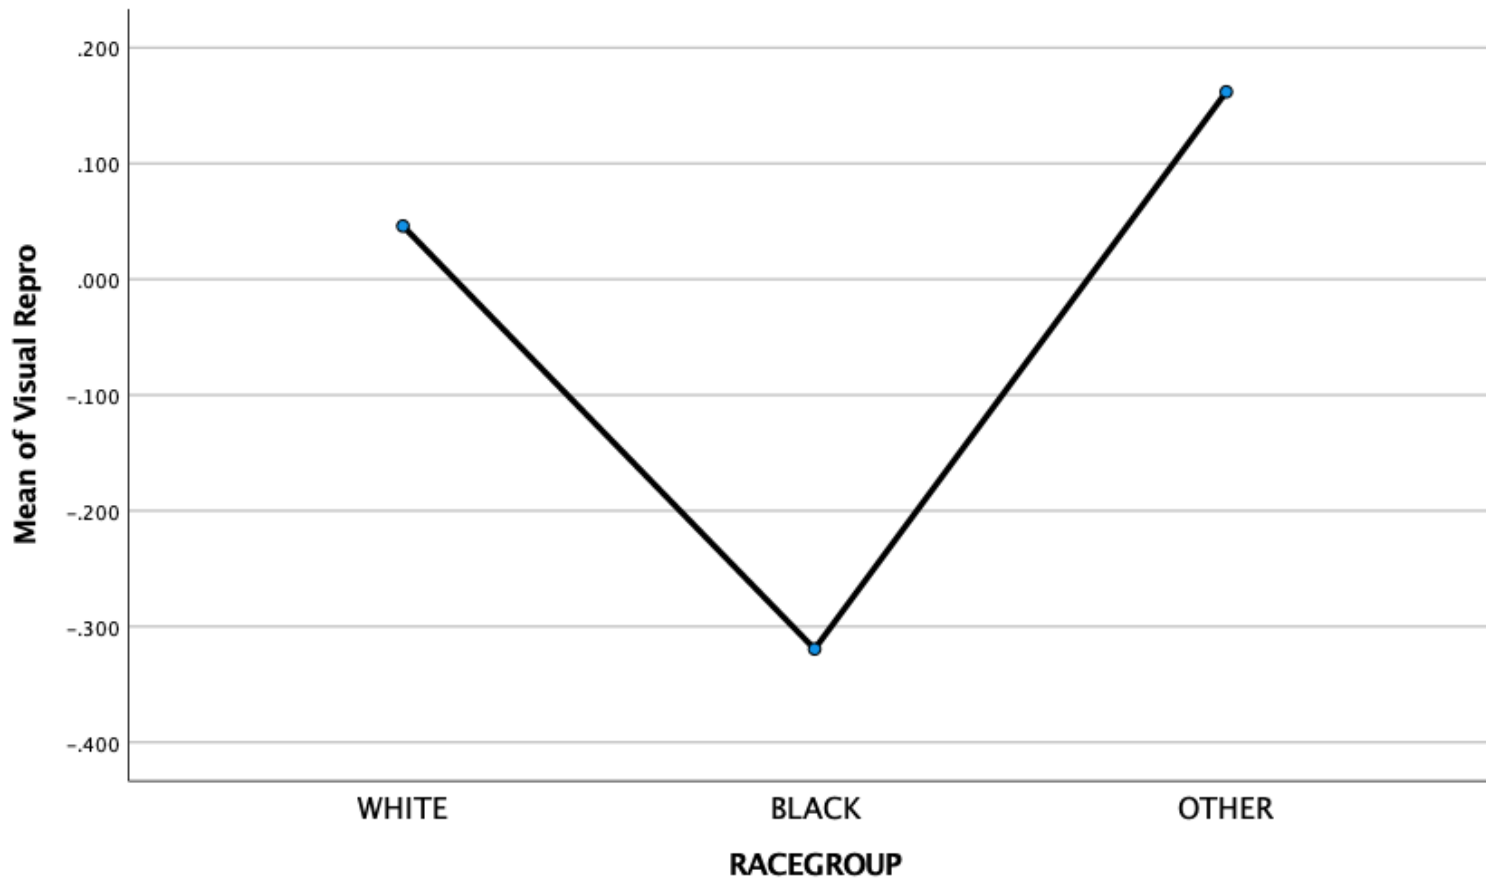



**Supplemental Table 10**  
*ANOVA on Factor Scores by Race*

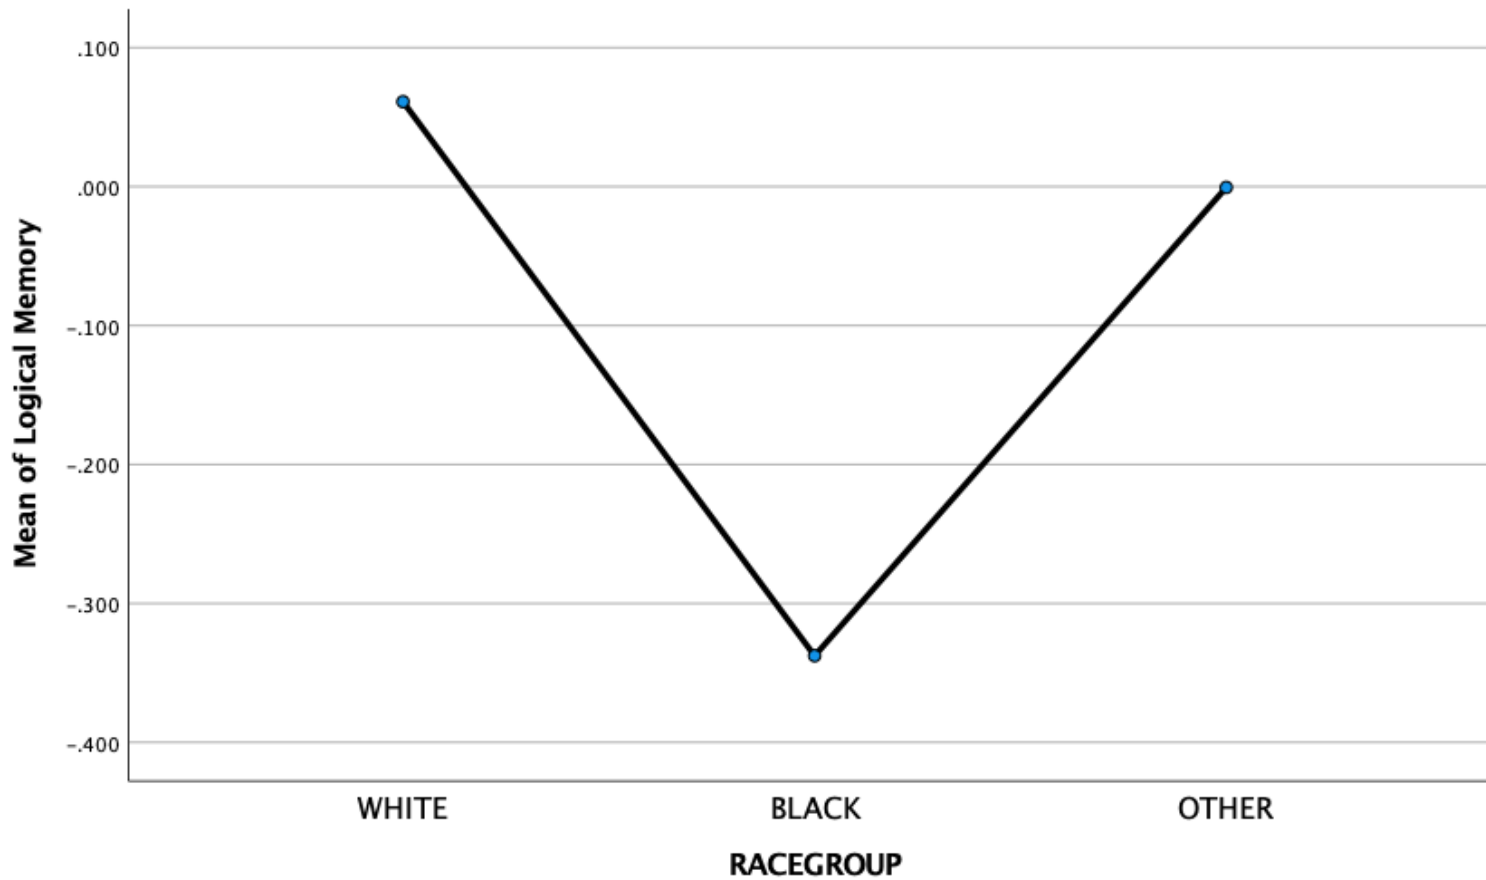

**Supplemental Table 10**  
*ANOVA on Factor Scores by Race*

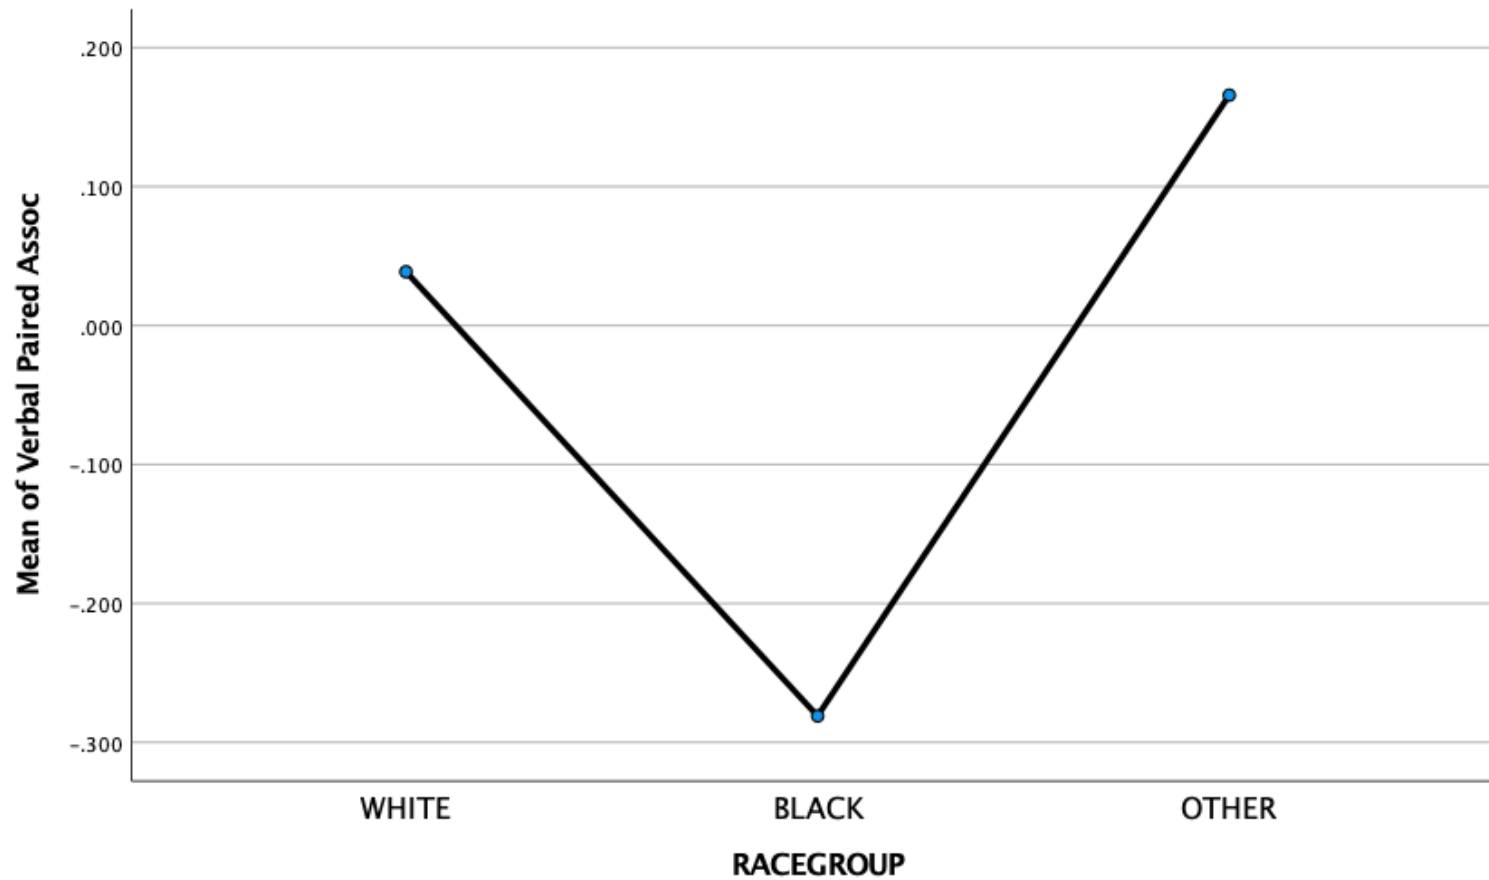

**Supplemental Table 10**  
*ANOVA on Factor Scores by Race*

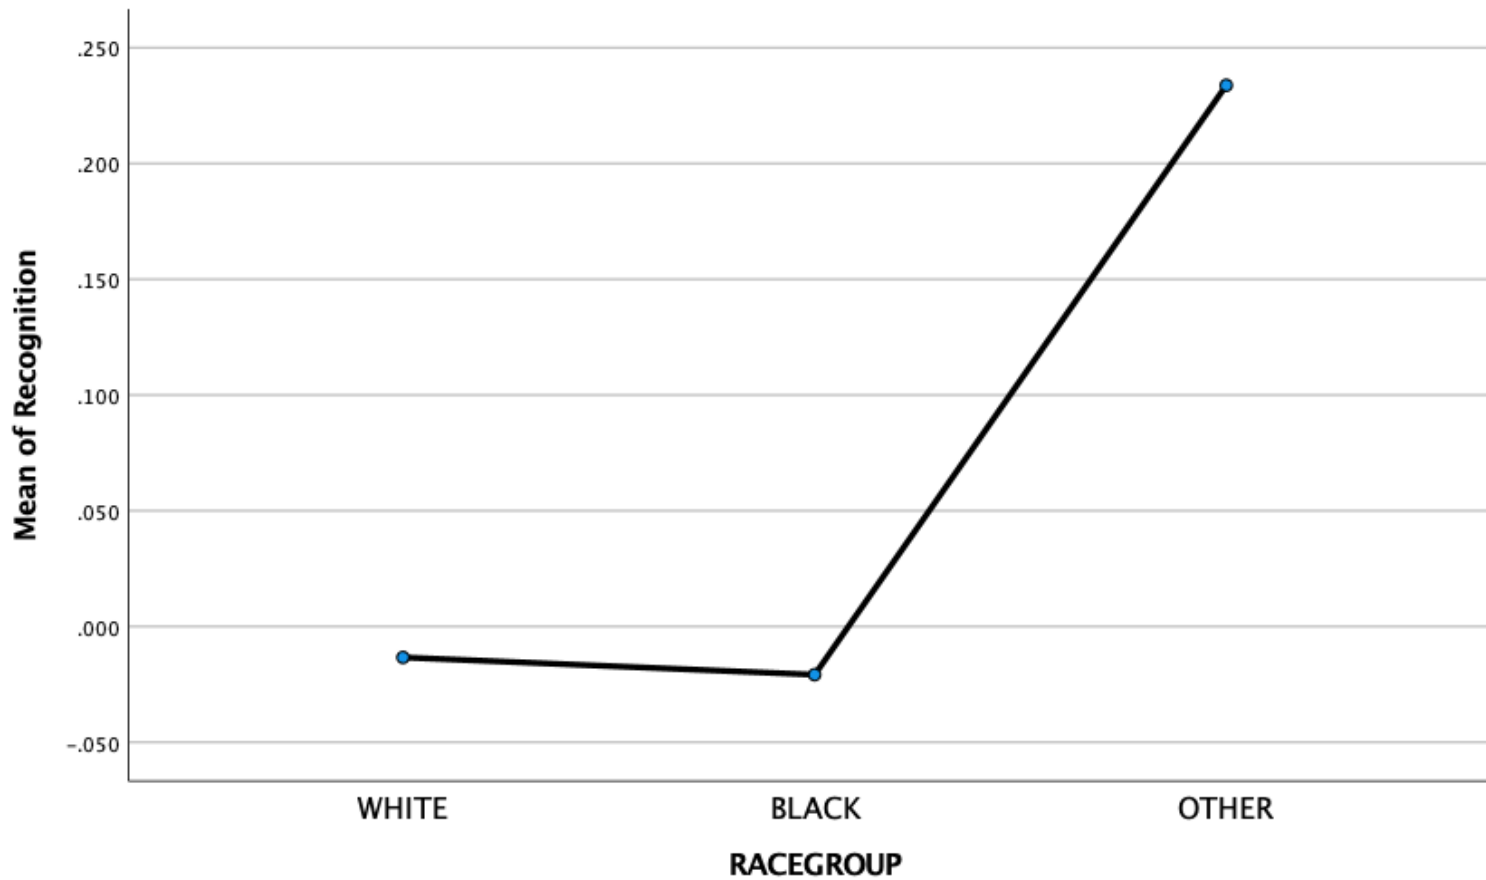

**Supplemental Table 10**  
*ANOVA on Factor Scores by Race*

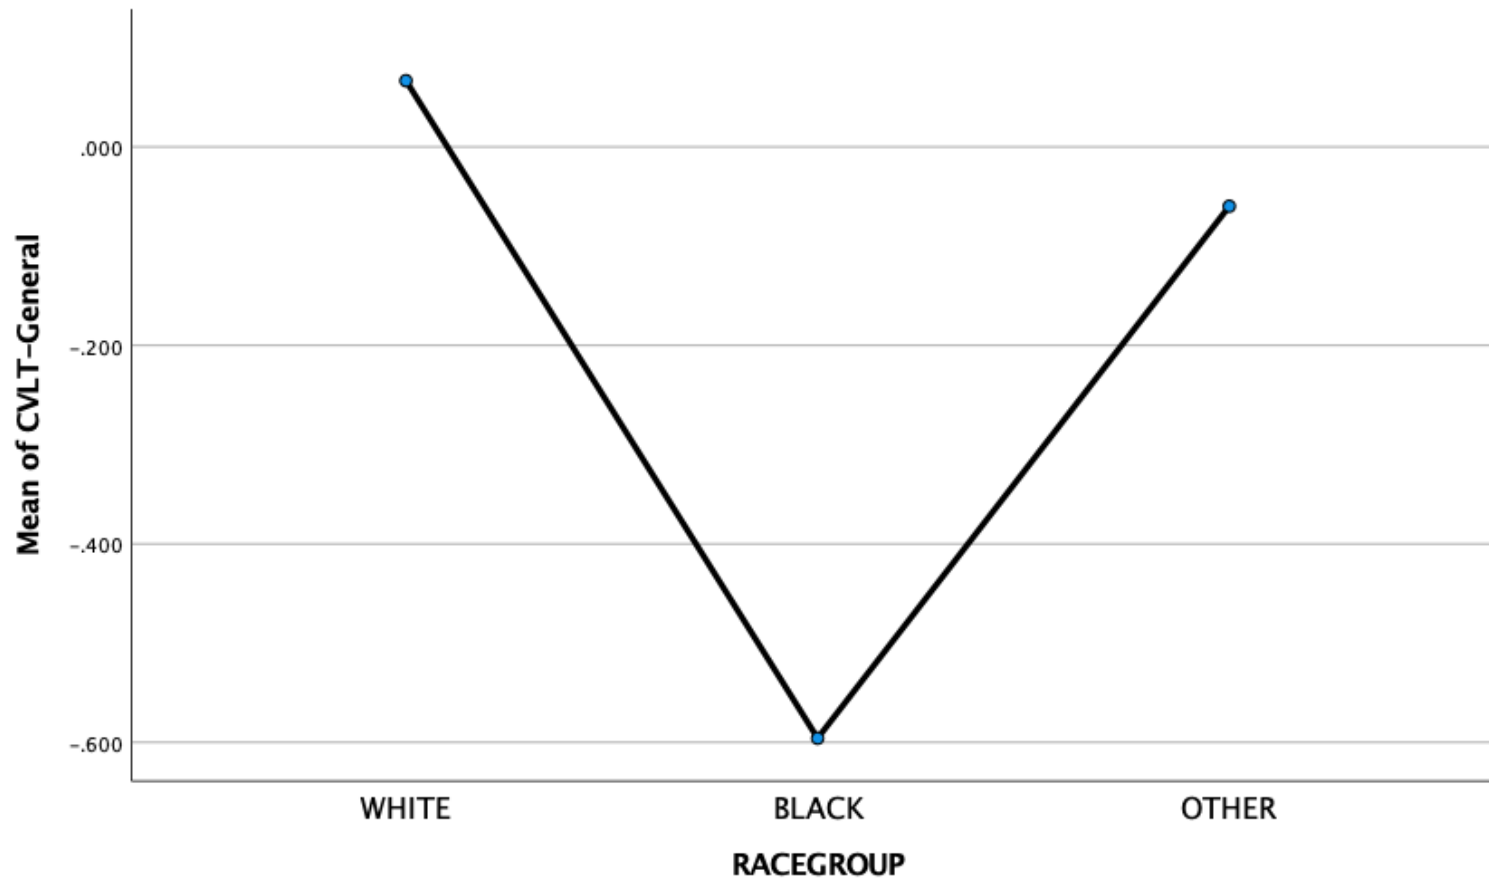

**Supplemental Table 10**  
*ANOVA on Factor Scores by Race*

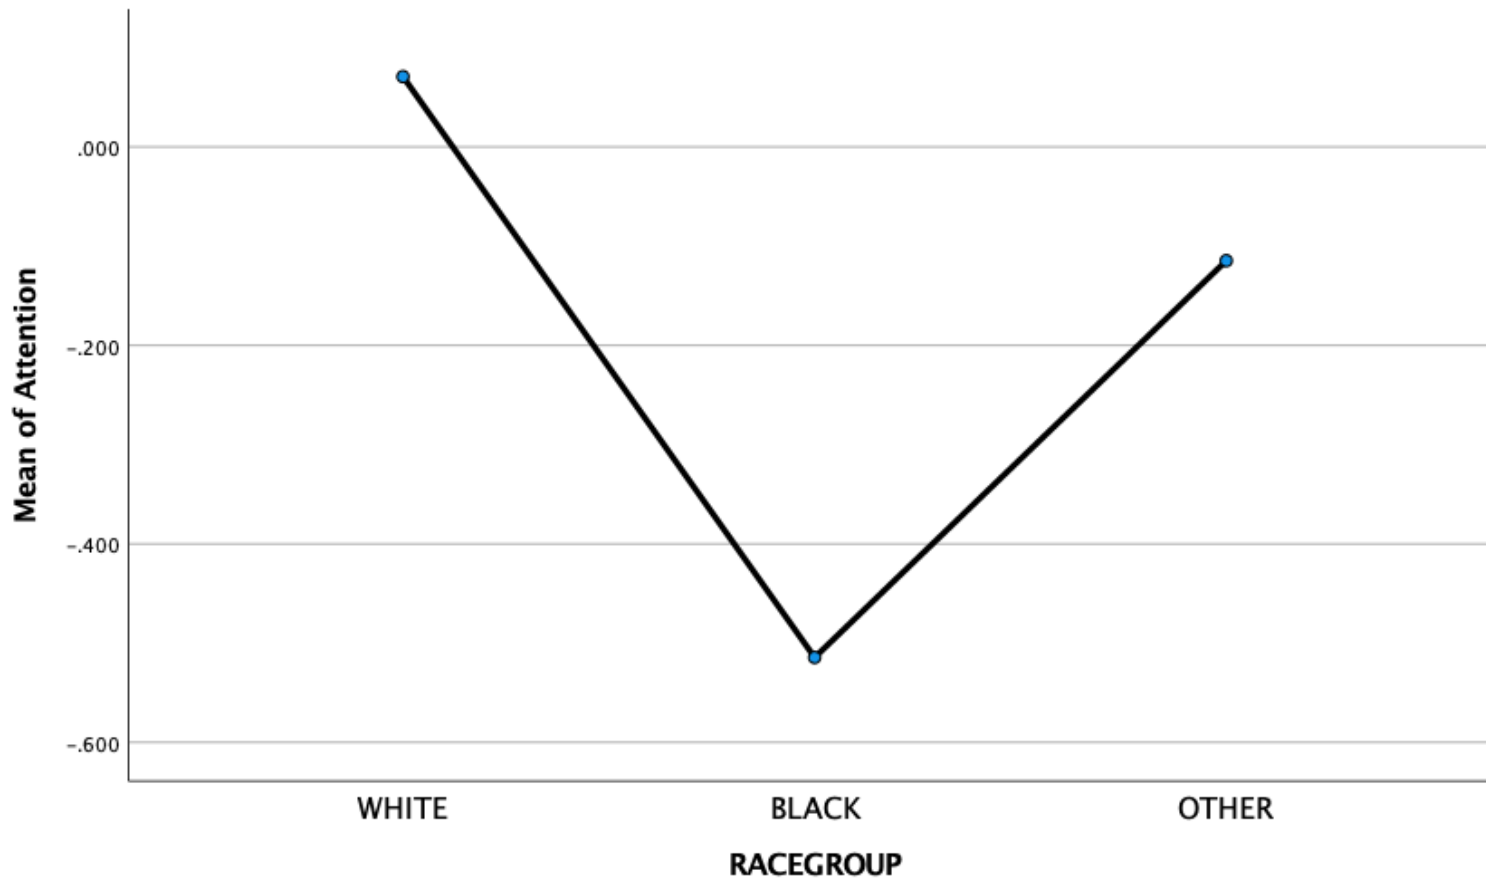

**Supplemental Table 10**  
*ANOVA on Factor Scores by Race*

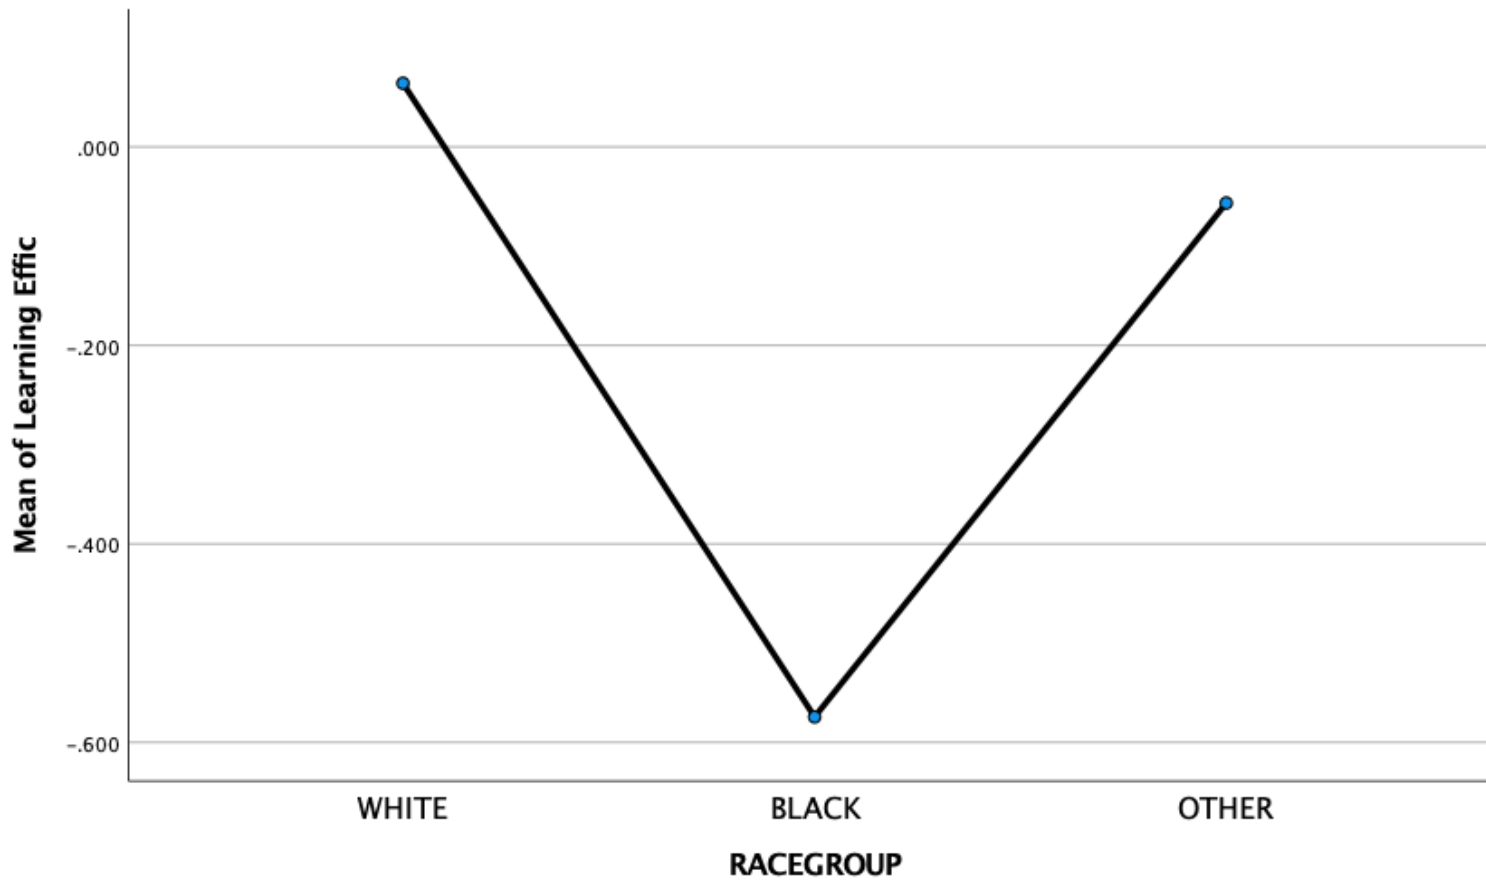

**Supplemental Table 10**  
*ANOVA on Factor Scores by Race*

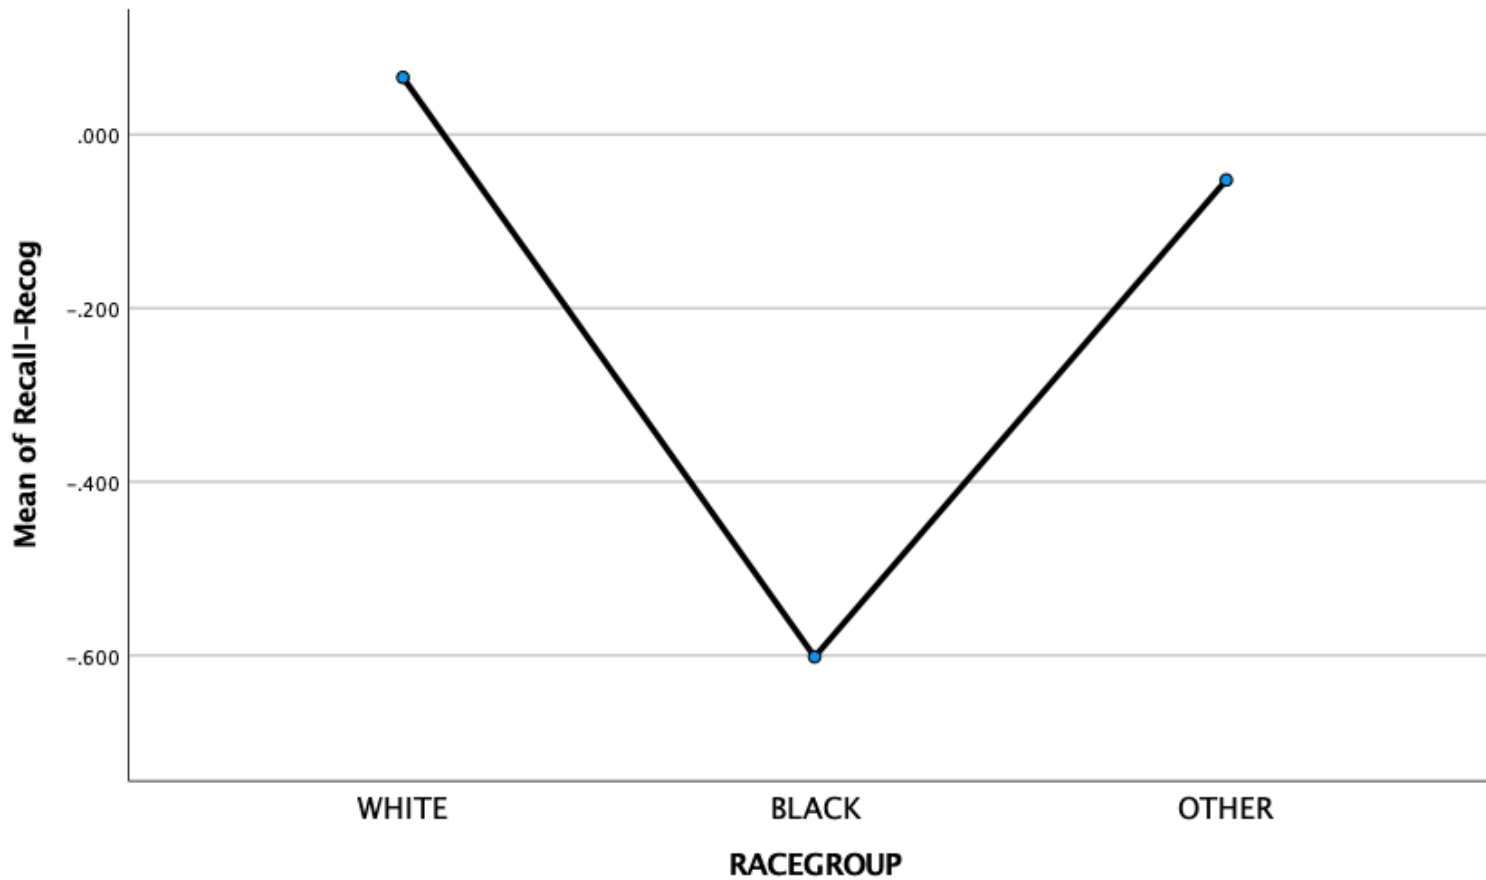

**Supplemental Table 10**  
*ANOVA on Factor Scores by Race*

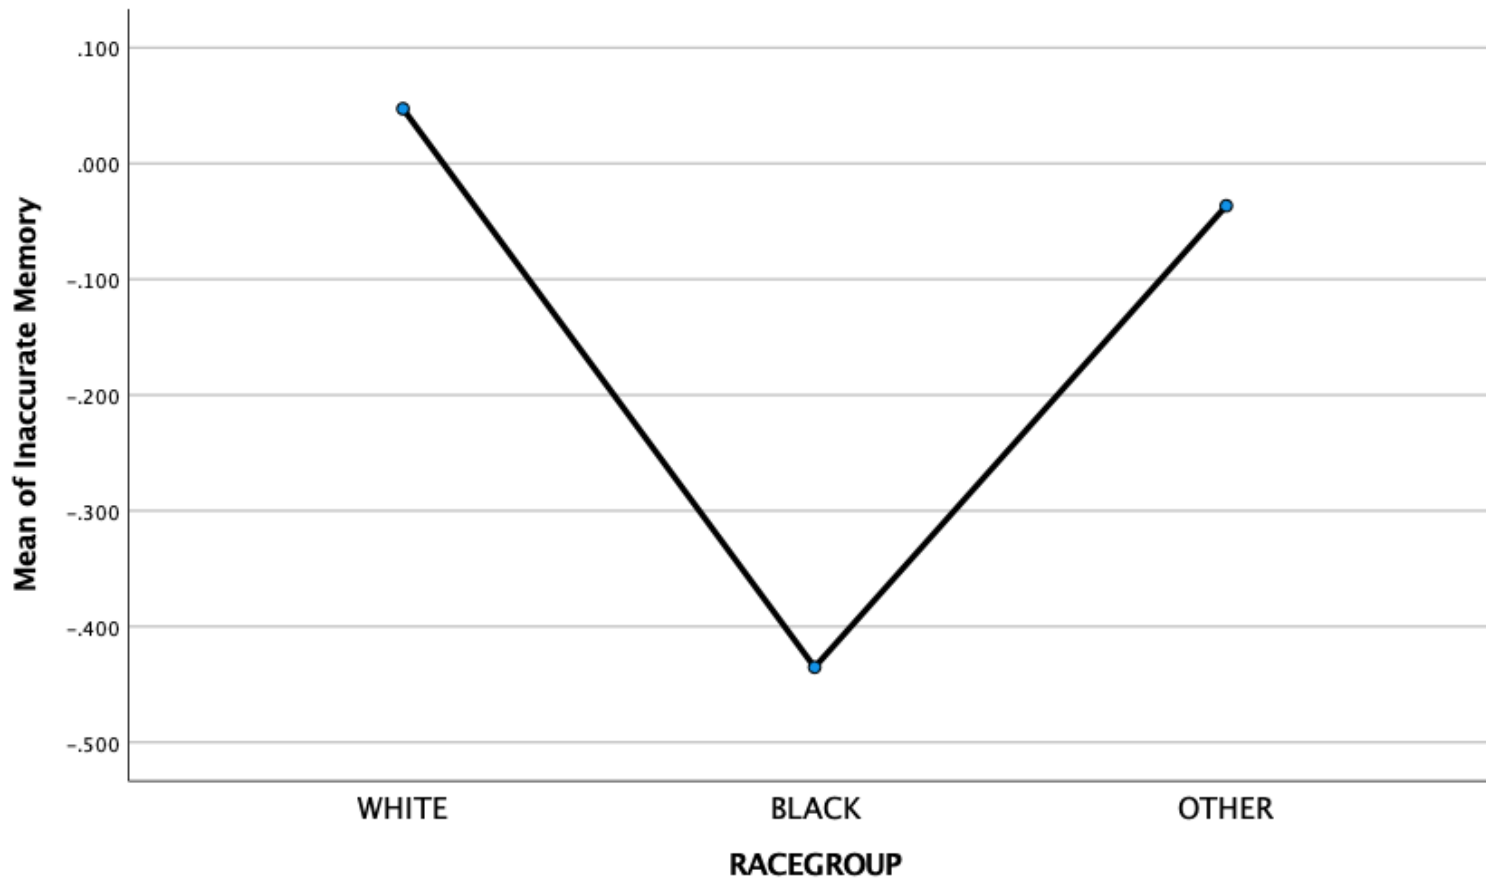



**Supplemental Table 10**  
*ANOVA on Factor Scores by Race*

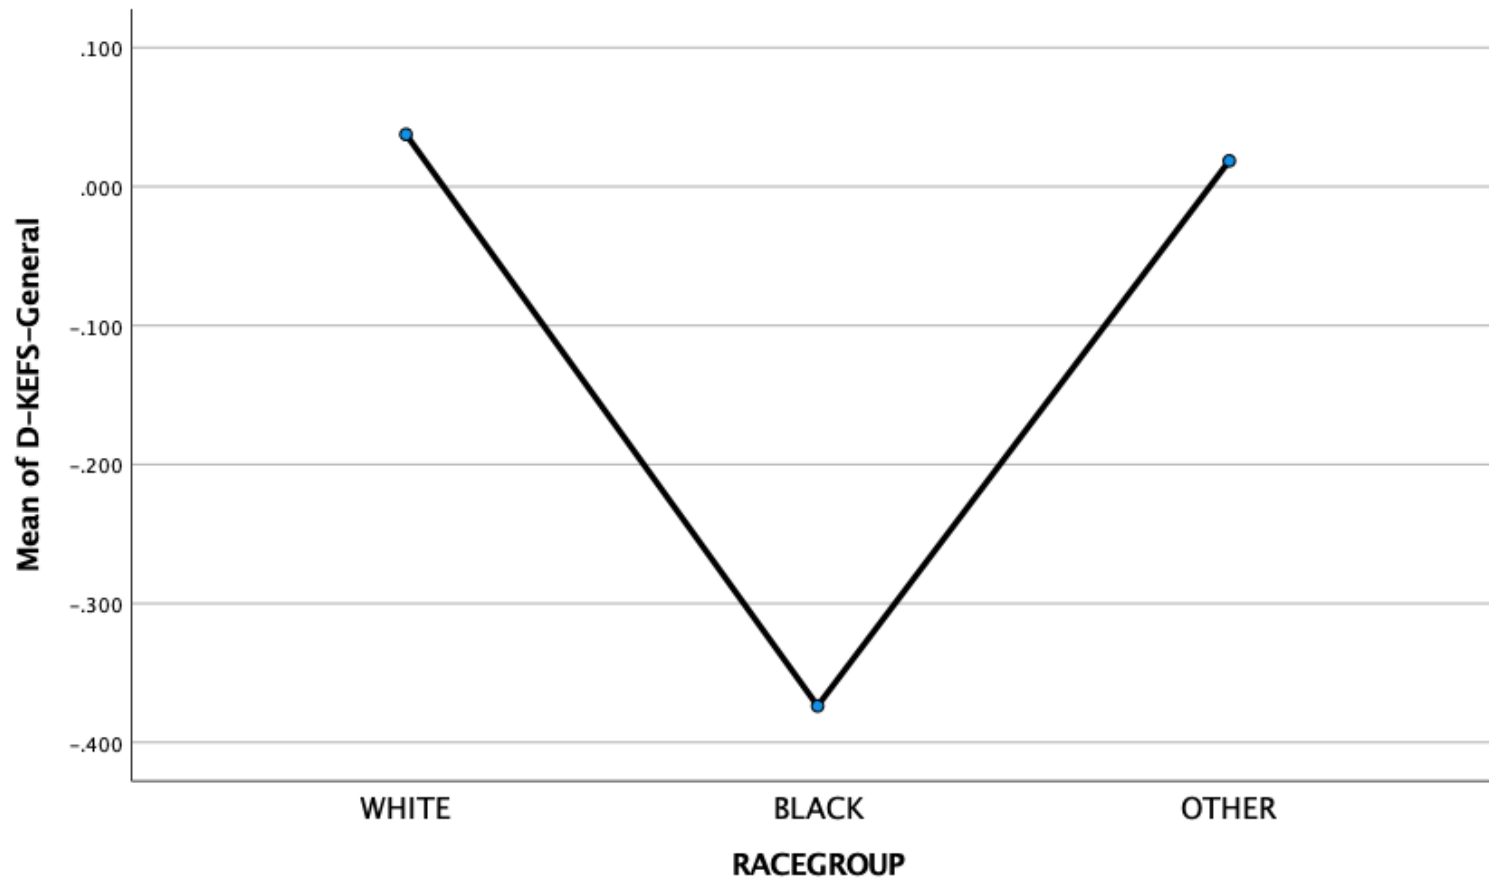

**Supplemental Table 10**  
*ANOVA on Factor Scores by Race*

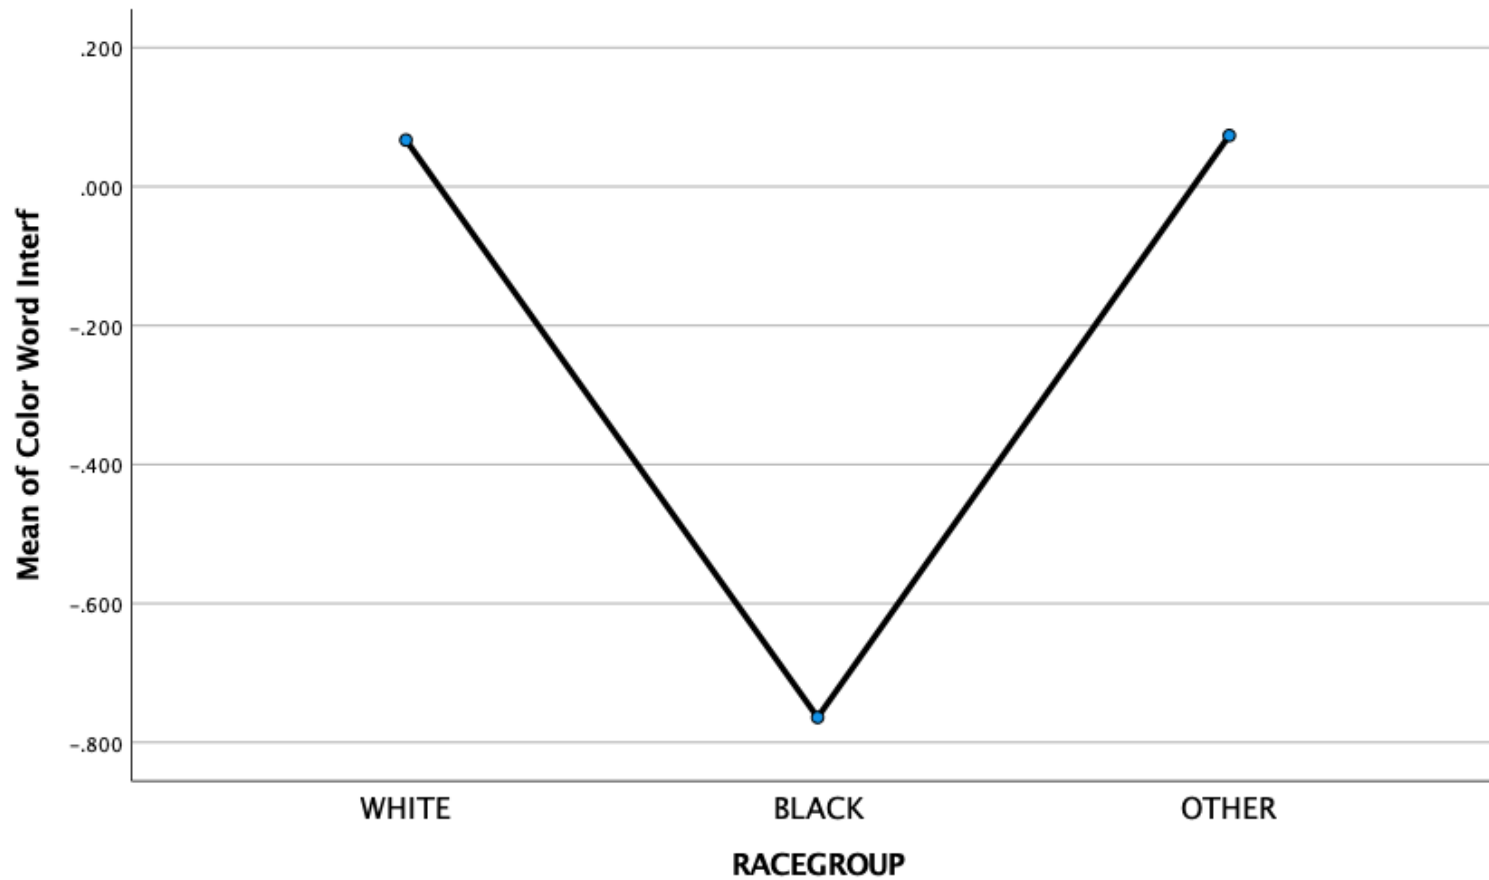

**Supplemental Table 10**  
*ANOVA on Factor Scores by Race*

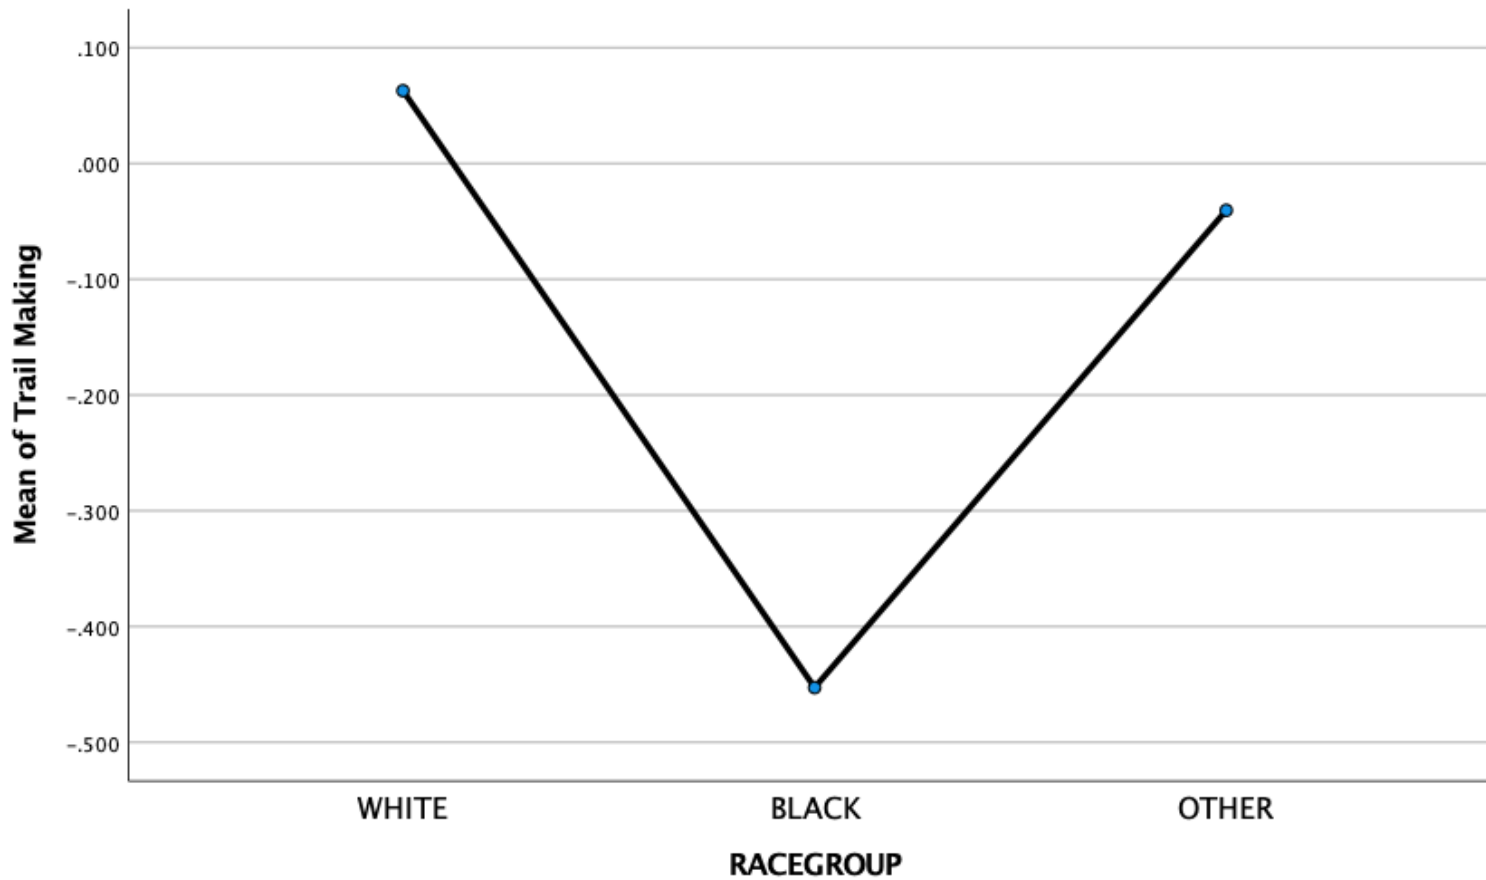

**Supplemental Table 10**  
*ANOVA on Factor Scores by Race*

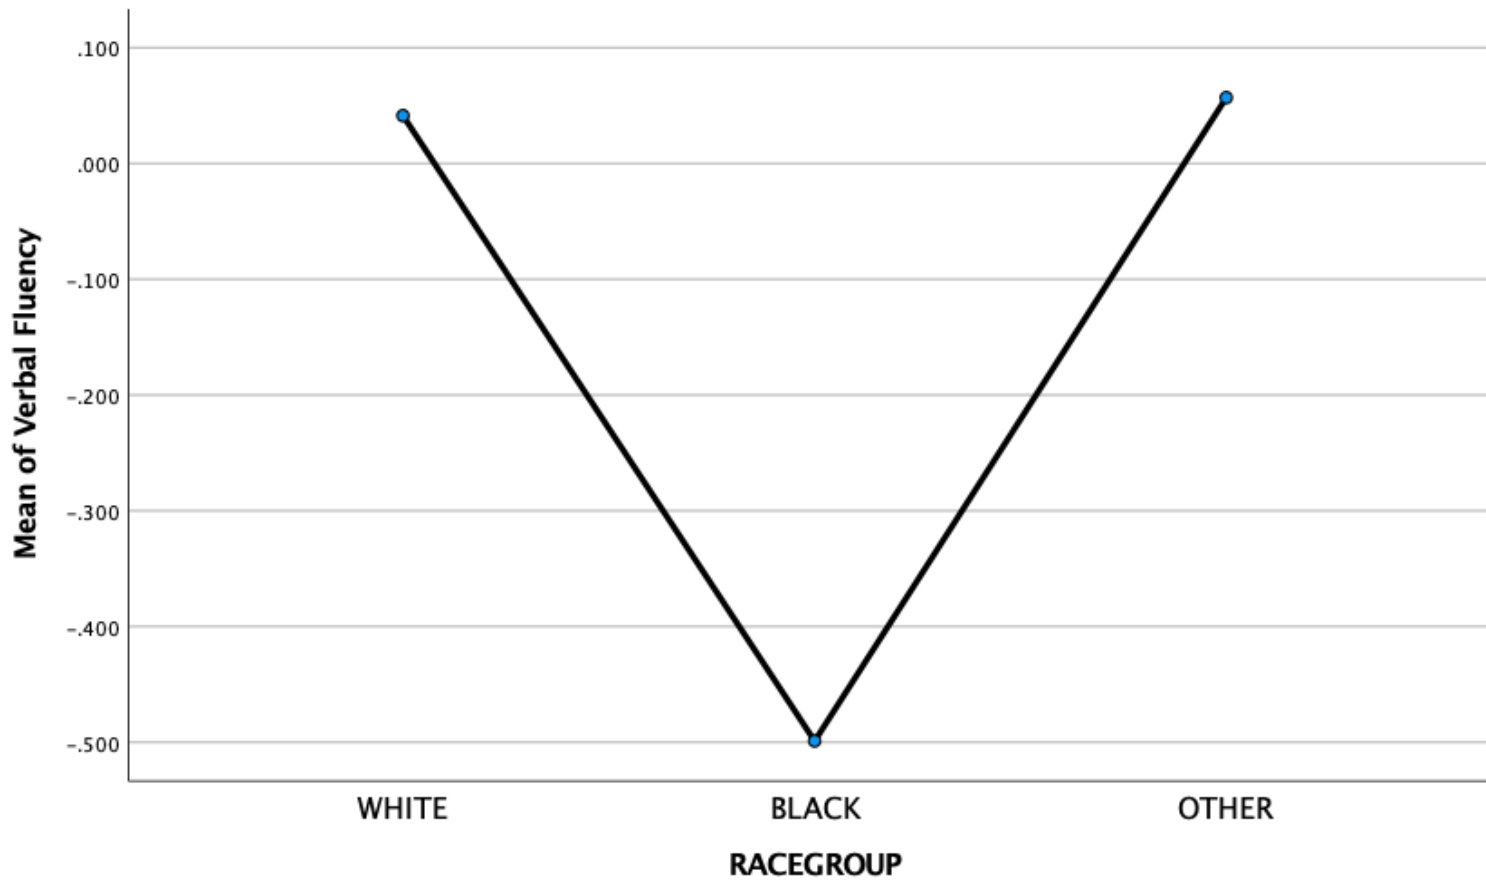

**Supplemental Table 10**  
*ANOVA on Factor Scores by Race*

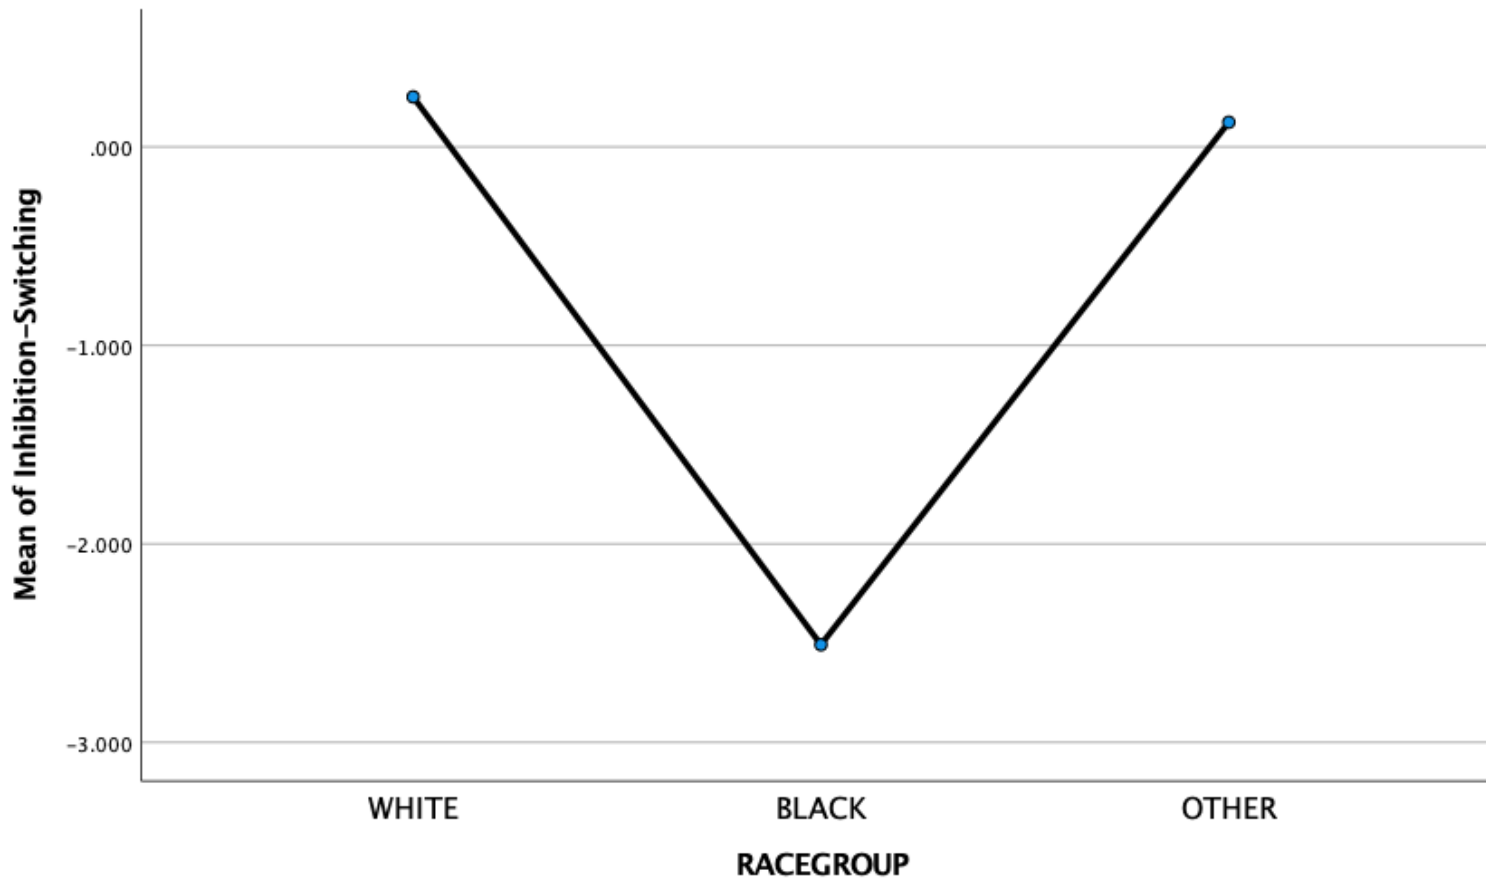

Supplement: NIHMS1868877-supplement-Supplemental_Material_12.pdf [file NIHMS1868877-supplement-Supplemental_Material_12.pdf]
