# Supplementary material
Source: PubMed Central journal article supplement (PMC9945479)
Supplement: NIHMS1868877-supplement-Supplemental_Material_1.pdf [file NIHMS1868877-supplement-Supplemental_Material_1.pdf]

### Supplemental Figure 1

Estimated Marginal Means of WAIS-IV Factor Scores by Pre-Exam Diagnosis

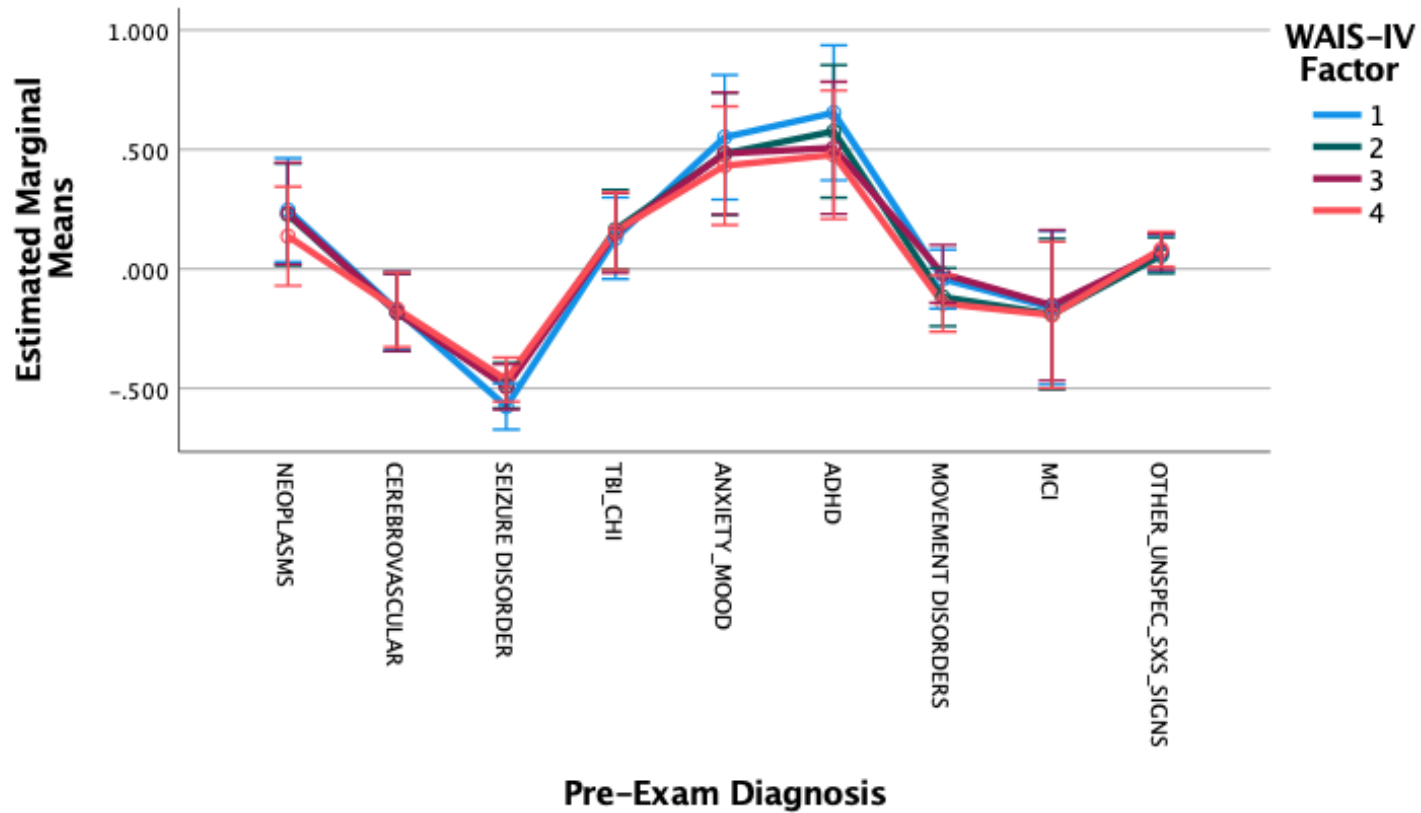

Error bars: 95% CI

Note. WAIS-IV Factors: 1, Verbal Comprehension; 2, Perceptual Reasoning; 3, Working Memory; 4, Processing Speed.
