# Supplementary material
Source: PubMed Central journal article supplement (PMC9945479)
Supplement: NIHMS1868877-supplement-Supplemental_Material_3.pdf [file NIHMS1868877-supplement-Supplemental_Material_3.pdf]

**Supplemental Table 2***Recoding of Original ICD-10-CM Codes into Diagnostic Types (DX\_TYPE) for Pre-Exam Diagnoses*

| <b>Diagnosis Code &amp; Label</b>                                                                                                                                                                                                                                                                                                                                                                                                                                                           | <b>Frequency</b> | <b>DX Label</b> | <b>DX_TYPE (code)</b> |
|---------------------------------------------------------------------------------------------------------------------------------------------------------------------------------------------------------------------------------------------------------------------------------------------------------------------------------------------------------------------------------------------------------------------------------------------------------------------------------------------|------------------|-----------------|-----------------------|
| Blank (missing)                                                                                                                                                                                                                                                                                                                                                                                                                                                                             | 51               |                 |                       |
| B20 Human immunodeficiency virus [HIV] disease                                                                                                                                                                                                                                                                                                                                                                                                                                              | 1                |                 |                       |
| B20 Human immunodeficiency virus [HIV] disease (acquired immune deficiency syndrome [AIDS]; AIDS-related complex [ARC]; HIV infection, symptomatic; Human immunodeficiency virus [HIV] disease complicating pregnancy, childbirth and the puerperium, if applicable (O98.7-); code(s) to identify all manifestations of HIV infection; asymptomatic human immunodeficiency virus [HIV] infection status (Z21); exposure to HIV virus (Z20.6); inconclusive serologic evidence of HIV (R75)) | 1                |                 |                       |
| C15.9 Malignant neoplasm of esophagus, unspecified                                                                                                                                                                                                                                                                                                                                                                                                                                          | 1                | Neoplasms       | 1                     |
| C18.9 Malignant neoplasm of colon, unspecified (Malignant neoplasm of large intestine NOS)                                                                                                                                                                                                                                                                                                                                                                                                  | 1                | Neoplasms       | 1                     |
| C34.11 Malignant neoplasm of upper lobe, right bronchus or lung                                                                                                                                                                                                                                                                                                                                                                                                                             | 1                | Neoplasms       | 1                     |
| C34.90 Malignant neoplasm of unspecified part of unspecified bronchus or lung (Lung cancer NOS)                                                                                                                                                                                                                                                                                                                                                                                             | 2                | Neoplasms       | 1                     |
| C41.9 Malignant neoplasm of bone and articular cartilage, unspecified                                                                                                                                                                                                                                                                                                                                                                                                                       | 1                | Neoplasms       | 1                     |
| C43.9 Malignant melanoma of skin, unspecified (Malignant melanoma of unspecified site of skin; Melanoma (malignant) NOS)                                                                                                                                                                                                                                                                                                                                                                    | 1                | Neoplasms       | 1                     |
| C50.411 Malignant neoplasm of upper-outer quadrant of right female breast                                                                                                                                                                                                                                                                                                                                                                                                                   | 1                | Neoplasms       | 1                     |
| C50.412 Malignant neoplasm of upper-outer quadrant of left female breast                                                                                                                                                                                                                                                                                                                                                                                                                    | 1                | Neoplasms       | 1                     |
| C50.912 Malignant neoplasm of unspecified site of left female breast                                                                                                                                                                                                                                                                                                                                                                                                                        | 1                | Neoplasms       | 1                     |
| C50.919 Malignant neoplasm of unspecified site of unspecified female breast                                                                                                                                                                                                                                                                                                                                                                                                                 | 1                | Neoplasms       | 1                     |
| C56.9 Malignant neoplasm of unspecified ovary                                                                                                                                                                                                                                                                                                                                                                                                                                               | 1                | Neoplasms       | 1                     |
| C71.0 Malignant neoplasm of cerebrum, except lobes and ventricles (Malignant neoplasm of supratentorial NOS)                                                                                                                                                                                                                                                                                                                                                                                | 2                | Neoplasms       | 1                     |
| C71.1 Malignant neoplasm of frontal lobe                                                                                                                                                                                                                                                                                                                                                                                                                                                    | 1                | Neoplasms       | 1                     |

**Supplemental Table 2***Recoding of Original ICD-10-CM Codes into Diagnostic Types (DX\_TYPE) for Pre-Exam Diagnoses*

| <b>Diagnosis Code &amp; Label</b>                                                                                                                                                                                                      | <b>Frequency</b> | <b>DX Label</b> | <b>DX_TYPE (code)</b> |
|----------------------------------------------------------------------------------------------------------------------------------------------------------------------------------------------------------------------------------------|------------------|-----------------|-----------------------|
| C71.2 Malignant neoplasm of temporal lobe                                                                                                                                                                                              | 3                | Neoplasms       | 1                     |
| C71.6 Malignant neoplasm of cerebellum                                                                                                                                                                                                 | 9                | Neoplasms       | 1                     |
| C71.9 Malignant neoplasm of brain, unspecified                                                                                                                                                                                         | 52               | Neoplasms       | 1                     |
| C79.31 Secondary malignant neoplasm of brain                                                                                                                                                                                           | 11               | Neoplasms       | 1                     |
| C79.81 Secondary malignant neoplasm of breast                                                                                                                                                                                          | 1                | Neoplasms       | 1                     |
| C80.1 Malignant (primary) neoplasm, unspecified (Cancer NOS; Cancer unspecified site (primary); Carcinoma unspecified site (primary); Malignancy unspecified site (primary); secondary malignant neoplasm of unspecified site (C79.9)) | 4                | Neoplasms       | 1                     |
| C81.20 Mixed cellularity Hodgkin lymphoma, unspecified site                                                                                                                                                                            | 1                | Neoplasms       | 1                     |
| C83.00 Small cell B-cell lymphoma, unspecified site                                                                                                                                                                                    | 1                | Neoplasms       | 1                     |
| C83.30 Diffuse large B-cell lymphoma, unspecified site                                                                                                                                                                                 | 1                | Neoplasms       | 1                     |
| C83.70 Burkitt lymphoma, unspecified site                                                                                                                                                                                              | 1                | Neoplasms       | 1                     |
| C83.79 Burkitt lymphoma, extranodal and solid organ sites                                                                                                                                                                              | 1                | Neoplasms       | 1                     |
| C85.89 Other specified types of non-Hodgkin lymphoma, extranodal and solid organ sites                                                                                                                                                 | 2                | Neoplasms       | 1                     |
| C85.90 Non-Hodgkin lymphoma, unspecified, unspecified site                                                                                                                                                                             | 1                | Neoplasms       | 1                     |
| C91.00 Acute lymphoblastic leukemia not having achieved remission (Acute lymphoblastic leukemia with failed remission; Acute lymphoblastic leukemia NOS)                                                                               | 2                | Neoplasms       | 1                     |
| C92.A1 Acute myeloid leukemia with multilineage dysplasia, in remission                                                                                                                                                                | 1                | Neoplasms       | 1                     |
| C93.11 Chronic myelomonocytic leukemia, in remission                                                                                                                                                                                   | 1                | Neoplasms       | 1                     |
| D18.00 Hemangioma unspecified site                                                                                                                                                                                                     | 1                | Neoplasms       | 1                     |
| D32.0 Benign neoplasm of cerebral meninges                                                                                                                                                                                             | 4                | Neoplasms       | 1                     |
| D32.9 Benign neoplasm of meninges, unspecified                                                                                                                                                                                         | 1                | Neoplasms       | 1                     |
| D32.9 Benign neoplasm of meninges, unspecified (Meningioma NOS)                                                                                                                                                                        | 8                | Neoplasms       | 1                     |
| D33.2 Benign neoplasm of brain, unspecified                                                                                                                                                                                            | 2                | Neoplasms       | 1                     |

**Supplemental Table 2***Recoding of Original ICD-10-CM Codes into Diagnostic Types (DX\_TYPE) for Pre-Exam Diagnoses*

| <b>Diagnosis Code &amp; Label</b>                                                                                                                                                                                                                                                                                                                                                                                                                                                                                                 | <b>Frequency</b> | <b>DX Label</b> | <b>DX_TYPE (code)</b> |
|-----------------------------------------------------------------------------------------------------------------------------------------------------------------------------------------------------------------------------------------------------------------------------------------------------------------------------------------------------------------------------------------------------------------------------------------------------------------------------------------------------------------------------------|------------------|-----------------|-----------------------|
| D33.3 Benign neoplasm of cranial nerves (Benign neoplasm of olfactory bulb)                                                                                                                                                                                                                                                                                                                                                                                                                                                       | 1                | Neoplasms       | 1                     |
| D43.2 Neoplasm of uncertain behavior of brain, unspecified                                                                                                                                                                                                                                                                                                                                                                                                                                                                        | 1                | Neoplasms       | 1                     |
| D44.4 Neoplasm of uncertain behavior of craniopharyngeal duct                                                                                                                                                                                                                                                                                                                                                                                                                                                                     | 3                | Neoplasms       | 1                     |
| D46.9 Myelodysplastic syndrome, unspecified (Myelodysplasia NOS)                                                                                                                                                                                                                                                                                                                                                                                                                                                                  | 1                | Neoplasms       | 1                     |
| D48.1 Neoplasm of uncertain behavior of connective and other soft tissue (Neoplasm of uncertain behavior of connective tissue of ear; Neoplasm of uncertain behavior of connective tissue of eyelid; Stromal tumors of uncertain behavior of digestive system; neoplasm of uncertain behavior of articular cartilage (D48.0); neoplasm of uncertain behavior of cartilage of larynx (D38.0); neoplasm of uncertain behavior of cartilage of nose (D38.5); neoplasm of uncertain behavior of connective tissue of breast (D48.6-)) | 2                | Neoplasms       | 1                     |
| D49.6 Neoplasm of unspecified behavior of brain                                                                                                                                                                                                                                                                                                                                                                                                                                                                                   | 3                | Neoplasms       | 1                     |
| D49.6 Neoplasm of unspecified behavior of brain (neoplasm of unspecified behavior of cerebral meninges (D49.7); neoplasm of unspecified behavior of cranial nerves (D49.7))                                                                                                                                                                                                                                                                                                                                                       | 23               | Neoplasms       | 1                     |
| D57.1 Sickle-cell disease without crisis (Hb-SS disease without crisis; Sickle-cell anemia NOS; Sickle-cell disease NOS; Sickle-cell disorder NOS)                                                                                                                                                                                                                                                                                                                                                                                | 1                |                 |                       |
| D82.1 Di George's syndrome (Pharyngeal pouch syndrome; Thymic aplasia; Thymic aplasia or hypoplasia with immunodeficiency)                                                                                                                                                                                                                                                                                                                                                                                                        | 1                |                 |                       |
| D86 Sarcoidosis                                                                                                                                                                                                                                                                                                                                                                                                                                                                                                                   | 1                |                 |                       |
| E03.8 Other specified hypothyroidism                                                                                                                                                                                                                                                                                                                                                                                                                                                                                              | 1                |                 |                       |
| E03.9 Hypothyroidism, unspecified (Myxedema NOS)                                                                                                                                                                                                                                                                                                                                                                                                                                                                                  | 1                |                 |                       |
| E06.3 Autoimmune thyroiditis (Hashimoto's thyroiditis; Hashitoxicosis (transient); Lymphadenoid goiter; Lymphocytic thyroiditis; Struma lymphomatosa)                                                                                                                                                                                                                                                                                                                                                                             | 1                |                 |                       |
| E11.9 Type 2 diabetes mellitus without complications                                                                                                                                                                                                                                                                                                                                                                                                                                                                              | 2                |                 |                       |

**Supplemental Table 2***Recoding of Original ICD-10-CM Codes into Diagnostic Types (DX\_TYPE) for Pre-Exam Diagnoses*

| <b>Diagnosis Code &amp; Label</b>                                                                                                                                                                                                                                                                                                                                                                                                                                                                                       | <b>Frequency</b> | <b>DX Label</b>     | <b>DX_TYPE (code)</b> |
|-------------------------------------------------------------------------------------------------------------------------------------------------------------------------------------------------------------------------------------------------------------------------------------------------------------------------------------------------------------------------------------------------------------------------------------------------------------------------------------------------------------------------|------------------|---------------------|-----------------------|
| E28.2 Polycystic ovarian syndrome (Sclerocystic ovary syndrome; Stein-Leventhal syndrome)                                                                                                                                                                                                                                                                                                                                                                                                                               | 1                |                     |                       |
| E34.9 Endocrine disorder, unspecified (Endocrine disturbance NOS; Hormone disturbance NOS)                                                                                                                                                                                                                                                                                                                                                                                                                              | 2                |                     |                       |
| E51.2 Wernicke's encephalopathy                                                                                                                                                                                                                                                                                                                                                                                                                                                                                         | 2                |                     |                       |
| E78.4 Other hyperlipidemia                                                                                                                                                                                                                                                                                                                                                                                                                                                                                              | 1                |                     |                       |
| E78.5 Hyperlipidemia, unspecified                                                                                                                                                                                                                                                                                                                                                                                                                                                                                       | 3                |                     |                       |
| E85.4 Organ-limited amyloidosis (Localized amyloidosis; Transthyretin-related (ATTR) familial amyloid cardiomyopathy)                                                                                                                                                                                                                                                                                                                                                                                                   | 1                |                     |                       |
| E89.3 Postprocedural hypopituitarism (Postirradiation hypopituitarism)                                                                                                                                                                                                                                                                                                                                                                                                                                                  | 1                |                     |                       |
| F01.50 Vascular dementia without behavioral disturbance (Major neurocognitive disorder without behavioral disturbance)                                                                                                                                                                                                                                                                                                                                                                                                  | 20               | Cerebrovascula<br>r | 2                     |
| F01.51 Vascular dementia with behavioral disturbance (Major neurocognitive disorder due to vascular disease, with behavioral disturbance; Major neurocognitive disorder with aggressive behavior; Major neurocognitive disorder with combative behavior; Major neurocognitive disorder with violent behavior; Vascular dementia with aggressive behavior; Vascular dementia with combative behavior; Vascular dementia with violent behavior; code, if applicable, to identify wandering in vascular dementia (Z91.83)) | 1                | Cerebrovascula<br>r | 2                     |
| F02.80 Dementia in other diseases classified elsewhere without behavioral disturbance (Dementia in other diseases classified elsewhere NOS; Major neurocognitive disorder in other diseases classified elsewhere)                                                                                                                                                                                                                                                                                                       | 1                |                     |                       |

**Supplemental Table 2***Recoding of Original ICD-10-CM Codes into Diagnostic Types (DX\_TYPE) for Pre-Exam Diagnoses*

| <b>Diagnosis Code &amp; Label</b>                                                                                                                                                                                                                                                                                                                                                                                                                                                                                                                                                                                                                                                                          | <b>Frequency</b> | <b>DX Label</b> | <b>DX_TYPE<br/>(code)</b> |
|------------------------------------------------------------------------------------------------------------------------------------------------------------------------------------------------------------------------------------------------------------------------------------------------------------------------------------------------------------------------------------------------------------------------------------------------------------------------------------------------------------------------------------------------------------------------------------------------------------------------------------------------------------------------------------------------------------|------------------|-----------------|---------------------------|
| F02.81 Dementia in other diseases classified elsewhere with behavioral disturbance (Dementia in other diseases classified elsewhere with aggressive behavior; Dementia in other diseases classified elsewhere with combative behavior; Dementia in other diseases classified elsewhere with violent behavior; Major neurocognitive disorder in other diseases classified elsewhere with aggressive behavior; Major neurocognitive disorder in other diseases classified elsewhere with combative behavior; Major neurocognitive disorder in other diseases classified elsewhere with violent behavior; code, if applicable, to identify wandering in dementia in conditions classified elsewhere (Z91.83)) | 1                |                 |                           |
| F03.90 Unspecified dementia without behavioral disturbance (Dementia NOS)                                                                                                                                                                                                                                                                                                                                                                                                                                                                                                                                                                                                                                  | 27               |                 |                           |
| F03.91 Unspecified dementia with behavioral disturbance (Unspecified dementia with aggressive behavior; Unspecified dementia with combative behavior; Unspecified dementia with violent behavior; code, if applicable, to identify wandering in unspecified dementia (Z91.83))                                                                                                                                                                                                                                                                                                                                                                                                                             | 6                |                 |                           |
| F06.8 Other specified mental disorders due to known physiological condition (Epileptic psychosis NOS; Obsessive-compulsive and related disorder due to a known physiological condition; Organic dissociative disorder; Organic emotionally labile [asthenic] disorder)                                                                                                                                                                                                                                                                                                                                                                                                                                     | 9                |                 |                           |
| F07.0 Personality change due to known physiological condition (Frontal lobe syndrome; Limbic epilepsy personality syndrome; Lobotomy syndrome; Organic personality disorder; Organic pseudopsychopathic personality; Organic pseudoretarded personality; Postleucotomy syndrome; underlying physiological condition; mild cognitive impairment (G31.84); postconcussional syndrome (F07.81); postencephalitic syndrome (F07.89); signs and symptoms involving emotional state (R45.-); specific personality disorder (F60.-))                                                                                                                                                                              | 2                |                 |                           |

## Supplemental Table 2

Recoding of Original ICD-10-CM Codes into Diagnostic Types (DX\_TYPE) for Pre-Exam Diagnoses

| Diagnosis Code & Label                                                                                                                                                                                                                                                                                                                                                                                                                     | Frequency | DX Label | DX_TYPE (code) |
|--------------------------------------------------------------------------------------------------------------------------------------------------------------------------------------------------------------------------------------------------------------------------------------------------------------------------------------------------------------------------------------------------------------------------------------------|-----------|----------|----------------|
| F07.81 Postconcussional syndrome                                                                                                                                                                                                                                                                                                                                                                                                           | 2         | TBI      |                |
| F07.81 Postconcussional syndrome (Postcontusional syndrome (encephalopathy); Post-traumatic brain syndrome, nonpsychotic; code to identify associated post-traumatic headache, if applicable (G44.3-); current concussion (brain) (S06.0-); postencephalitic syndrome (F07.89))                                                                                                                                                            | 39        | TBI      |                |
| F09 Unspecified mental disorder due to known physiological condition (Mental disorder NOS due to known physiological condition; Organic brain syndrome NOS; Organic mental disorder NOS; Organic psychosis NOS; Symptomatic psychosis NOS; the underlying physiological condition; psychosis NOS (F29))                                                                                                                                    | 7         |          |                |
| F10.1 Alcohol abuse (alcohol dependence (F10.2-); alcohol use, unspecified (F10.9-))                                                                                                                                                                                                                                                                                                                                                       | 1         |          |                |
| F10.20 Alcohol dependence, uncomplicated (Alcohol use disorder, moderate; Alcohol use disorder, severe)                                                                                                                                                                                                                                                                                                                                    | 1         |          |                |
| F10.27 Alcohol dependence with alcohol-induced persisting dementia (Alcohol use disorder, moderate, with alcohol-induced major neurocognitive disorder, nonamnestic-confabulatory type; Alcohol use disorder, severe, with alcohol-induced major neurocognitive disorder, nonamnestic-confabulatory type)                                                                                                                                  | 1         |          |                |
| F22 Delusional disorders (Delusional dysmorphophobia; Involutional paranoid state; Paranoia; Paranoia querulans; Paranoid psychosis; Paranoid state; Paraphrenia (late); Sensitiver Beziehungswahn; mood [affective] disorders with psychotic symptoms (F30.2, F31.2, F31.5, F31.64, F32.3, F33.3); paranoid schizophrenia (F20.0); paranoid personality disorder (F60.0); paranoid psychosis, psychogenic (F23); paranoid reaction (F23)) | 1         |          |                |
| F23 Brief psychotic disorder (Paranoid reaction; Psychogenic paranoid psychosis; mood [affective] disorders with psychotic symptoms (F30.2, F31.2, F31.5, F31.64, F32.3, F33.3))                                                                                                                                                                                                                                                           | 1         |          |                |

## Supplemental Table 2

Recoding of Original ICD-10-CM Codes into Diagnostic Types (DX\_TYPE) for Pre-Exam Diagnoses

| Diagnosis Code & Label                                                                                                                                                                                                                                                                                                    | Frequency | DX Label       | DX_TYPE (code) |
|---------------------------------------------------------------------------------------------------------------------------------------------------------------------------------------------------------------------------------------------------------------------------------------------------------------------------|-----------|----------------|----------------|
| F25.9 Schizoaffective disorder, unspecified (Schizoaffective psychosis NOS)                                                                                                                                                                                                                                               | 1         |                |                |
| F29 Unspecified psychosis not due to a substance or known physiological condition (Psychosis NOS; Unspecified schizophrenia spectrum and other psychotic disorder; mental disorder NOS (F99); unspecified mental disorder due to known physiological condition (F09))                                                     | 1         |                |                |
| F31 Bipolar disorder (bipolar I disorder; bipolar type I disorder; manic-depressive illness; manic-depressive psychosis; manic-depressive reaction; bipolar disorder, single manic episode (F30.-); major depressive disorder, single episode (F32.-); major depressive disorder, recurrent (F33.-); cyclothymia (F34.0)) | 1         | Anxiety & Mood |                |
| F31.31 Bipolar disorder, current episode depressed, mild                                                                                                                                                                                                                                                                  | 1         | Anxiety & Mood |                |
| F31.64 Bipolar disorder, current episode mixed, severe, with psychotic features (Bipolar disorder, current episode mixed with mood-congruent psychotic symptoms; Bipolar disorder, current episode mixed with mood-incongruent psychotic symptoms)                                                                        | 1         | Anxiety & Mood |                |
| F31.76 Bipolar disorder, in full remission, most recent episode depressed                                                                                                                                                                                                                                                 | 1         | Anxiety & Mood |                |
| F31.81 Bipolar II disorder (Bipolar disorder, type 2)                                                                                                                                                                                                                                                                     | 1         | Anxiety & Mood |                |
| F31.89 Other bipolar disorder (Recurrent manic episodes NOS)                                                                                                                                                                                                                                                              | 1         | Anxiety & Mood |                |
| F31.9 Bipolar disorder, unspecified (Manic depression)                                                                                                                                                                                                                                                                    | 2         | Anxiety & Mood |                |
| F32.4 Major depressive disorder, single episode, in partial remission                                                                                                                                                                                                                                                     | 1         | Anxiety & Mood |                |
| F32.89 Other specified depressive episodes (Atypical depression; Post-schizophrenic depression; Single episode of 'masked' depression NOS)                                                                                                                                                                                | 2         | Anxiety & Mood |                |
| F32.9 Major depressive disorder, single episode, unspecified (Depression NOS; Depressive disorder NOS; Major depression NOS)                                                                                                                                                                                              | 12        | Anxiety & Mood |                |

**Supplemental Table 2***Recoding of Original ICD-10-CM Codes into Diagnostic Types (DX\_TYPE) for Pre-Exam Diagnoses*

| <b>Diagnosis Code &amp; Label</b>                                                                                                                                                                                                                                                                                                                                                                               | <b>Frequency</b> | <b>DX Label</b> | <b>DX_TYPE<br/>(code)</b> |
|-----------------------------------------------------------------------------------------------------------------------------------------------------------------------------------------------------------------------------------------------------------------------------------------------------------------------------------------------------------------------------------------------------------------|------------------|-----------------|---------------------------|
| F33 Major depressive disorder, recurrent (recurrent episodes of depressive reaction; recurrent episodes of endogenous depression; recurrent episodes of major depression; recurrent episodes of psychogenic depression; recurrent episodes of reactive depression; recurrent episodes of seasonal depressive disorder; recurrent episodes of vital depression; bipolar disorder (F31.-); manic episode (F30.-)) | 2                | Anxiety & Mood  |                           |
| F33.0 Major depressive disorder, recurrent, mild                                                                                                                                                                                                                                                                                                                                                                | 1                | Anxiety & Mood  |                           |
| F33.1 Major depressive disorder, recurrent, moderate                                                                                                                                                                                                                                                                                                                                                            | 7                | Anxiety & Mood  |                           |
| F33.2 Major depressive disorder, recurrent severe without psychotic features                                                                                                                                                                                                                                                                                                                                    | 4                | Anxiety & Mood  |                           |
| F33.41 Major depressive disorder, recurrent, in partial remission                                                                                                                                                                                                                                                                                                                                               | 2                | Anxiety & Mood  |                           |
| F33.42 Major depressive disorder, recurrent, in full remission                                                                                                                                                                                                                                                                                                                                                  | 1                | Anxiety & Mood  |                           |
| F33.9 Major depressive disorder, recurrent, unspecified (Monopolar depression NOS)                                                                                                                                                                                                                                                                                                                              | 2                | Anxiety & Mood  |                           |
| F34.1 Dysthymic disorder (Depressive neurosis; Depressive personality disorder; Dysthymia; Neurotic depression; Persistent anxiety depression; Persistent depressive disorder; anxiety depression (mild or not persistent) (F41.8))                                                                                                                                                                             | 3                | Anxiety & Mood  |                           |
| F39 Unspecified mood [affective] disorder (Affective psychosis NOS)                                                                                                                                                                                                                                                                                                                                             | 3                | Anxiety & Mood  |                           |
| F41.0 Panic disorder [episodic paroxysmal anxiety] (Panic attack; Panic state; panic disorder with agoraphobia (F40.01))                                                                                                                                                                                                                                                                                        | 1                | Anxiety & Mood  |                           |
| F41.1 Generalized anxiety disorder (Anxiety neurosis; Anxiety reaction; Anxiety state; Overanxious disorder; neurasthenia (F48.8))                                                                                                                                                                                                                                                                              | 11               | Anxiety & Mood  |                           |
| F41.3 Other mixed anxiety disorders                                                                                                                                                                                                                                                                                                                                                                             | 1                | Anxiety & Mood  |                           |
| F41.8 Other specified anxiety disorders (Anxiety depression (mild or not persistent); Anxiety hysteria; Mixed anxiety and depressive disorder)                                                                                                                                                                                                                                                                  | 1                | Anxiety & Mood  |                           |
| F41.9 Anxiety disorder, unspecified                                                                                                                                                                                                                                                                                                                                                                             | 1                | Anxiety & Mood  |                           |
| F41.9 Anxiety disorder, unspecified (Anxiety NOS)                                                                                                                                                                                                                                                                                                                                                               | 15               | Anxiety & Mood  |                           |



**Supplemental Table 2***Recoding of Original ICD-10-CM Codes into Diagnostic Types (DX\_TYPE) for Pre-Exam Diagnoses*

| <b>Diagnosis Code &amp; Label</b>                                                                                                                                                                                                                                                                                   | <b>Frequency</b> | <b>DX Label</b> | <b>DX_TYPE<br/>(code)</b> |
|---------------------------------------------------------------------------------------------------------------------------------------------------------------------------------------------------------------------------------------------------------------------------------------------------------------------|------------------|-----------------|---------------------------|
| F42.2 Mixed obsessional thoughts and acts                                                                                                                                                                                                                                                                           | 2                | Anxiety & Mood  |                           |
| F42.9 Obsessive-compulsive disorder, unspecified                                                                                                                                                                                                                                                                    | 1                | Anxiety & Mood  |                           |
| F43.0 Acute stress reaction (Acute crisis reaction; Acute reaction to stress; Combat and operational stress reaction; Combat fatigue; Crisis state; Psychic shock)                                                                                                                                                  | 1                | Anxiety & Mood  |                           |
| F43.1 Post-traumatic stress disorder (PTSD) (Traumatic neurosis)                                                                                                                                                                                                                                                    | 2                | Anxiety & Mood  |                           |
| F43.10 Post-traumatic stress disorder, unspecified                                                                                                                                                                                                                                                                  | 13               | Anxiety & Mood  |                           |
| F43.21 Adjustment disorder with depressed mood                                                                                                                                                                                                                                                                      | 2                | Anxiety & Mood  |                           |
| F43.23 Adjustment disorder with mixed anxiety and depressed mood                                                                                                                                                                                                                                                    | 2                | 101             |                           |
| F44.4 Conversion disorder with motor symptom or deficit (Conversion disorder with abnormal movement; Conversion disorder with speech symptoms; Conversion disorder with swallowing symptoms; Conversion disorder with weakness/paralysis; Dissociative motor disorders; Psychogenic aphonia; Psychogenic dysphonia) | 1                |                 |                           |
| F44.5 Conversion disorder with seizures or convulsions (Conversion disorder with attacks or seizures; Dissociative convulsions)                                                                                                                                                                                     | 4                |                 |                           |
| F44.7 Conversion disorder with mixed symptom presentation                                                                                                                                                                                                                                                           | 1                |                 |                           |
| F45.0 Somatization disorder (Briquet's disorder; Multiple psychosomatic disorder)                                                                                                                                                                                                                                   | 1                |                 |                           |
| F45.41 Pain disorder exclusively related to psychological factors (Somatoform pain disorder (persistent))                                                                                                                                                                                                           | 1                |                 |                           |
| F48.2 Pseudobulbar affect (Involuntary emotional expression disorder; underlying cause, if known, such as:; amyotrophic lateral sclerosis (G12.21); multiple sclerosis (G35); sequelae of cerebrovascular disease (I69.-); sequelae of traumatic intracranial injury (S06.-))                                       | 1                |                 |                           |
| F48.8 Other specified nonpsychotic mental disorders                                                                                                                                                                                                                                                                 | 2                |                 |                           |

## Supplemental Table 2

Recoding of Original ICD-10-CM Codes into Diagnostic Types (DX\_TYPE) for Pre-Exam Diagnoses

| Diagnosis Code & Label                                                                                                                                                                                                         | Frequency | DX Label | DX_TYPE (code) |
|--------------------------------------------------------------------------------------------------------------------------------------------------------------------------------------------------------------------------------|-----------|----------|----------------|
| F48.8 Other specified nonpsychotic mental disorders (Dhat syndrome; Neurasthenia; Occupational neurosis, including writer's cramp; Psychasthenia; Psychasthenic neurosis; Psychogenic syncope)                                 | 4         |          |                |
| F50.00 Anorexia nervosa, unspecified                                                                                                                                                                                           | 1         |          |                |
| F60.3 Borderline personality disorder (Aggressive personality (disorder); Emotionally unstable personality disorder; Explosive personality (disorder); antisocial personality disorder (F60.2))                                | 3         |          |                |
| F79 Unspecified intellectual disabilities (Mental deficiency NOS; Mental subnormality NOS)                                                                                                                                     | 1         |          |                |
| F80.9 Developmental disorder of speech and language, unspecified (Communication disorder NOS; Language disorder NOS)                                                                                                           | 1         |          |                |
| F81.0 Specific reading disorder ('Backward reading' Developmental dyslexia; Specific learning disorder, with impairment in reading; Specific reading retardation; alexia NOS (R48.0); dyslexia NOS (R48.0))                    | 1         |          |                |
| F81.9 Developmental disorder of scholastic skills, unspecified (Knowledge acquisition disability NOS; Learning disability NOS; Learning disorder NOS)                                                                          | 8         |          |                |
| F84.0 Autistic disorder (Autism spectrum disorder; Infantile autism; Infantile psychosis; Kanner's syndrome; Asperger's syndrome (F84.5))                                                                                      | 1         |          |                |
| F84.5 Asperger's syndrome (Asperger's disorder; Autistic psychopathy; Schizoid disorder of childhood)                                                                                                                          | 2         |          |                |
| F84.9 Pervasive developmental disorder, unspecified (Atypical autism)                                                                                                                                                          | 1         |          |                |
| F89 Unspecified disorder of psychological development (Developmental disorder NOS; Neurodevelopmental disorder NOS)                                                                                                            | 2         |          |                |
| F90 Attention-deficit hyperactivity disorders (attention deficit disorder with hyperactivity; attention deficit syndrome with hyperactivity; anxiety disorders (F40.-, F41.-); mood [affective] disorders (F30-F39); pervasive | 3         | ADHD     |                |

**Supplemental Table 2***Recoding of Original ICD-10-CM Codes into Diagnostic Types (DX\_TYPE) for Pre-Exam Diagnoses*

| <b>Diagnosis Code &amp; Label</b>                                                                                                                                                                                                                                             | <b>Frequency</b> | <b>DX Label</b> | <b>DX_TYPE<br/>(code)</b> |
|-------------------------------------------------------------------------------------------------------------------------------------------------------------------------------------------------------------------------------------------------------------------------------|------------------|-----------------|---------------------------|
| developmental disorders (F84.-); schizophrenia (F20.-)                                                                                                                                                                                                                        |                  |                 |                           |
| F90.0 Attention-deficit hyperactivity disorder, predominantly inattentive type                                                                                                                                                                                                | 1                | ADHD            |                           |
| F90.0 Attention-deficit hyperactivity disorder, predominantly inattentive type (Attention-deficit/hyperactivity disorder, predominantly inattentive presentation)                                                                                                             | 9                | ADHD            |                           |
| F90.2 Attention-deficit hyperactivity disorder, combined type                                                                                                                                                                                                                 | 1                | ADHD            |                           |
| F90.2 Attention-deficit hyperactivity disorder, combined type (Attention-deficit/hyperactivity disorder, combined presentation)                                                                                                                                               | 4                | ADHD            |                           |
| F90.9 Attention-deficit hyperactivity disorder, unspecified type                                                                                                                                                                                                              | 8                | ADHD            |                           |
| F90.9 Attention-deficit hyperactivity disorder, unspecified type (Attention-deficit hyperactivity disorder of childhood or adolescence NOS; Attention-deficit hyperactivity disorder NOS)                                                                                     | 36               | ADHD            |                           |
| F95.1 Chronic motor or vocal tic disorder                                                                                                                                                                                                                                     | 1                |                 |                           |
| F95.2 Tourette's disorder (Combined vocal and multiple motor tic disorder [de la Tourette]; Tourette's syndrome)                                                                                                                                                              | 3                |                 |                           |
| F98.8 Other specified behavioral and emotional disorders with onset usually occurring in childhood and adolescence (Excessive masturbation; Nail-biting; Nose-picking; Thumb-sucking)                                                                                         | 4                |                 |                           |
| G04.81 Other encephalitis and encephalomyelitis (Noninfectious acute disseminated encephalomyelitis (noninfectious ADEM))                                                                                                                                                     | 4                |                 |                           |
| G04.90 Encephalitis and encephalomyelitis, unspecified (Ventriculitis (cerebral) NOS)                                                                                                                                                                                         | 3                |                 |                           |
| G06.0 Intracranial abscess and granuloma (Brain [any part] abscess (embolic); Cerebellar abscess (embolic); Cerebral abscess (embolic); Intracranial epidural abscess or granuloma; Intracranial extradural abscess or granuloma; Intracranial subdural abscess or granuloma; | 1                |                 |                           |

**Supplemental Table 2***Recoding of Original ICD-10-CM Codes into Diagnostic Types (DX\_TYPE) for Pre-Exam Diagnoses*

| <b>Diagnosis Code &amp; Label</b>                                                                                                                                                                                                        | <b>Frequency</b> | <b>DX Label</b>    | <b>DX_TYPE<br/>(code)</b> |
|------------------------------------------------------------------------------------------------------------------------------------------------------------------------------------------------------------------------------------------|------------------|--------------------|---------------------------|
| Otogenic abscess (embolic); tuberculous intracranial abscess and granuloma (A17.81))                                                                                                                                                     |                  |                    |                           |
| G10 Huntington's disease (Huntington's chorea; Huntington's dementia; dementia in other diseases classified elsewhere without behavioral disturbance (F02.80))                                                                           | 6                | Movement Disorders |                           |
| G11.3 Cerebellar ataxia with defective DNA repair (Ataxia telangiectasia [Louis-Bar]; Cockayne's syndrome (Q87.19); other disorders of purine and pyrimidine metabolism (E79.-); xeroderma pigmentosum (Q82.1))                          | 1                | Movement Disorders |                           |
| G11.4 Hereditary spastic paraplegia                                                                                                                                                                                                      | 1                | Movement Disorders |                           |
| G11.9 Hereditary ataxia, unspecified (Hereditary cerebellar ataxia NOS; Hereditary cerebellar degeneration; Hereditary cerebellar disease; Hereditary cerebellar syndrome)                                                               | 1                | Movement Disorders |                           |
| G12.21 Amyotrophic lateral sclerosis                                                                                                                                                                                                     | 2                | Movement Disorders |                           |
| G20 Parkinson's disease                                                                                                                                                                                                                  | 5                | Movement Disorders |                           |
| G20 Parkinson's disease (Hemiparkinsonism; Idiopathic Parkinsonism or Parkinson's disease; Paralysis agitans; Parkinsonism or Parkinson's disease NOS; Primary Parkinsonism or Parkinson's disease; dementia with Parkinsonism (G31.83)) | 513              | Movement Disorders |                           |
| G21.4 Vascular parkinsonism                                                                                                                                                                                                              | 1                | Movement Disorders |                           |
| G24 Dystonia (dyskinesia; athetoid cerebral palsy (G80.3))                                                                                                                                                                               | 1                | Movement Disorders |                           |
| G24.2 Idiopathic nonfamilial dystonia                                                                                                                                                                                                    | 2                | Movement Disorders |                           |
| G24.3 Spasmodic torticollis (congenital torticollis (Q68.0); hysterical torticollis (F44.4); ocular torticollis (R29.891); psychogenic torticollis (F45.8); torticollis NOS (M43.6); traumatic recurrent torticollis (S13.4))            | 11               | Movement Disorders |                           |
| G24.4 Idiopathic orofacial dystonia (Orofacial dyskinesia; drug induced orofacial dyskinesia (G24.01))                                                                                                                                   | 3                | Movement Disorders |                           |
| G24.5 Blepharospasm (drug induced blepharospasm (G24.01))                                                                                                                                                                                | 1                | Movement Disorders |                           |

## Supplemental Table 2

Recoding of Original ICD-10-CM Codes into Diagnostic Types (DX\_TYPE) for Pre-Exam Diagnoses

| Diagnosis Code & Label                                                                                                                                                                                                                                                                                                                                                                                                                                                                              | Frequency | DX Label           | DX_TYPE (code) |
|-----------------------------------------------------------------------------------------------------------------------------------------------------------------------------------------------------------------------------------------------------------------------------------------------------------------------------------------------------------------------------------------------------------------------------------------------------------------------------------------------------|-----------|--------------------|----------------|
| G24.8 Other dystonia (Acquired torsion dystonia NOS)                                                                                                                                                                                                                                                                                                                                                                                                                                                | 1         | Movement Disorders |                |
| G24.9 Dystonia, unspecified (Dyskinesia NOS)                                                                                                                                                                                                                                                                                                                                                                                                                                                        | 10        | Movement Disorders |                |
| G25.0 Essential tremor                                                                                                                                                                                                                                                                                                                                                                                                                                                                              | 2         | Movement Disorders |                |
| G25.0 Essential tremor (Familial tremor; tremor NOS (R25.1))                                                                                                                                                                                                                                                                                                                                                                                                                                        | 112       | Movement Disorders |                |
| G25.2 Other specified forms of tremor (Intention tremor)                                                                                                                                                                                                                                                                                                                                                                                                                                            | 4         | Movement Disorders |                |
| G25.5 Other chorea (Chorea NOS; chorea NOS with heart involvement (I02.0); Huntington's chorea (G10); rheumatic chorea (I02.-); Sydenham's chorea (I02.-))                                                                                                                                                                                                                                                                                                                                          | 1         | Movement Disorders |                |
| G25.69 Other tics of organic origin (habit spasm (F95.9); tic NOS (F95.9); Tourette's syndrome (F95.2))                                                                                                                                                                                                                                                                                                                                                                                             | 1         | Movement Disorders |                |
| G25.9 Extrapyrarnidal and movement disorder, unspecified                                                                                                                                                                                                                                                                                                                                                                                                                                            | 1         | Movement Disorders |                |
| G30.0 Alzheimer's disease with early onset                                                                                                                                                                                                                                                                                                                                                                                                                                                          | 6         |                    |                |
| G30.1 Alzheimer's disease with late onset                                                                                                                                                                                                                                                                                                                                                                                                                                                           | 5         |                    |                |
| G30.8 Other Alzheimer's disease                                                                                                                                                                                                                                                                                                                                                                                                                                                                     | 1         |                    |                |
| G30.9 Alzheimer's disease, unspecified                                                                                                                                                                                                                                                                                                                                                                                                                                                              | 7         |                    |                |
| G31.0 Frontotemporal dementia                                                                                                                                                                                                                                                                                                                                                                                                                                                                       | 1         |                    |                |
| G31.01 Pick's disease (Primary progressive aphasia; Progressive isolated aphasia)                                                                                                                                                                                                                                                                                                                                                                                                                   | 3         |                    |                |
| G31.09 Other frontotemporal dementia (Frontal dementia)                                                                                                                                                                                                                                                                                                                                                                                                                                             | 2         |                    |                |
| G31.83 Dementia with Lewy bodies (Dementia with Parkinsonism; Lewy body dementia; Lewy body disease)                                                                                                                                                                                                                                                                                                                                                                                                | 9         |                    |                |
| G31.84 Mild cognitive impairment, so stated                                                                                                                                                                                                                                                                                                                                                                                                                                                         | 3         | MCI                |                |
| G31.84 Mild cognitive impairment, so stated (Mild neurocognitive disorder; age related cognitive decline (R41.81); altered mental status (R41.82); cerebral degeneration (G31.9); change in mental status (R41.82); cognitive deficits following (sequelae of) cerebral hemorrhage or infarction (I69.01-, I69.11-, I69.21-, I69.31-, I69.81-, I69.91-); cognitive impairment due to intracranial or head injury (S06.-); dementia (F01.-, F02.-, F03); mild memory disturbance (F06.8); neurologic | 148       | MCI                |                |

## Supplemental Table 2

Recoding of Original ICD-10-CM Codes into Diagnostic Types (DX\_TYPE) for Pre-Exam Diagnoses

| Diagnosis Code & Label                                                                                                                                                                                                                                                                             | Frequency | DX Label          | DX_TYPE (code) |
|----------------------------------------------------------------------------------------------------------------------------------------------------------------------------------------------------------------------------------------------------------------------------------------------------|-----------|-------------------|----------------|
| neglect syndrome (R41.4); personality change, nonpsychotic (F68.8)                                                                                                                                                                                                                                 |           |                   |                |
| G31.85 Corticobasal degeneration                                                                                                                                                                                                                                                                   | 1         |                   |                |
| G31.9 Degenerative disease of nervous system, unspecified                                                                                                                                                                                                                                          | 3         |                   |                |
| G35 Multiple sclerosis (Disseminated multiple sclerosis; Generalized multiple sclerosis; Multiple sclerosis NOS; Multiple sclerosis of brain stem; Multiple sclerosis of cord)                                                                                                                     | 57        |                   |                |
| G37.8 Other specified demyelinating diseases of central nervous system                                                                                                                                                                                                                             | 1         |                   |                |
| G37.9 Demyelinating disease of central nervous system, unspecified                                                                                                                                                                                                                                 | 1         |                   |                |
| G40.009 Localization-related (focal) (partial) idiopathic epilepsy and epileptic syndromes with seizures of localized onset, not intractable, without status epilepticus (Localization-related (focal) (partial) idiopathic epilepsy and epileptic syndromes with seizures of localized onset NOS) | 5         | Seizure Disorders |                |
| G40.011 Localization-related (focal) (partial) idiopathic epilepsy and epileptic syndromes with seizures of localized onset, intractable, with status epilepticus                                                                                                                                  | 6         | Seizure Disorders |                |
| G40.019 Localization-related (focal) (partial) idiopathic epilepsy and epileptic syndromes with seizures of localized onset, intractable, without status epilepticus                                                                                                                               | 32        | Seizure Disorders |                |
| G40.109 Localization-related (focal) (partial) symptomatic epilepsy and epileptic syndromes with simple partial seizures, not intractable, without status epilepticus                                                                                                                              | 2         | Seizure Disorders |                |
| G40.109 Localization-related (focal) (partial) symptomatic epilepsy and epileptic syndromes with simple partial seizures, not intractable, without status epilepticus (Localization-related (focal) (partial) symptomatic epilepsy and                                                             | 31        | Seizure Disorders |                |

**Supplemental Table 2***Recoding of Original ICD-10-CM Codes into Diagnostic Types (DX\_TYPE) for Pre-Exam Diagnoses*

| <b>Diagnosis Code &amp; Label</b>                                                                                                                                                                                                                                                              | <b>Frequency</b> | <b>DX Label</b>   | <b>DX_TYPE<br/>(code)</b> |
|------------------------------------------------------------------------------------------------------------------------------------------------------------------------------------------------------------------------------------------------------------------------------------------------|------------------|-------------------|---------------------------|
| epileptic syndromes with simple partial seizures NOS)                                                                                                                                                                                                                                          |                  |                   |                           |
| G40.111 Localization-related (focal) (partial) symptomatic epilepsy and epileptic syndromes with simple partial seizures, intractable, with status epilepticus                                                                                                                                 | 1                | Seizure Disorders |                           |
| G40.119 Localization-related (focal) (partial) symptomatic epilepsy and epileptic syndromes with simple partial seizures, intractable, without status epilepticus                                                                                                                              | 25               | Seizure Disorders |                           |
| G40.201 Localization-related (focal) (partial) symptomatic epilepsy and epileptic syndromes with complex partial seizures, not intractable, with status epilepticus                                                                                                                            | 1                | Seizure Disorders |                           |
| G40.209 Localization-related (focal) (partial) symptomatic epilepsy and epileptic syndromes with complex partial seizures, not intractable, without status epilepticus (Localization-related (focal) (partial) symptomatic epilepsy and epileptic syndromes with complex partial seizures NOS) | 33               | Seizure Disorders |                           |
| G40.21 Localization-related (focal) (partial) symptomatic epilepsy and epileptic syndromes with complex partial seizures, intractable                                                                                                                                                          | 1                | Seizure Disorders |                           |
| G40.211 Localization-related (focal) (partial) symptomatic epilepsy and epileptic syndromes with complex partial seizures, intractable, with status epilepticus                                                                                                                                | 4                | Seizure Disorders |                           |
| G40.219 Localization-related (focal) (partial) symptomatic epilepsy and epileptic syndromes with complex partial seizures, intractable, without status epilepticus                                                                                                                             | 119              | Seizure Disorders |                           |
| G40.309 Generalized idiopathic epilepsy and epileptic syndromes, not intractable, without status epilepticus (Generalized idiopathic epilepsy and epileptic syndromes NOS)                                                                                                                     | 4                | Seizure Disorders |                           |
| G40.311 Generalized idiopathic epilepsy and epileptic syndromes, intractable, with status epilepticus                                                                                                                                                                                          | 1                | Seizure Disorders |                           |

**Supplemental Table 2***Recoding of Original ICD-10-CM Codes into Diagnostic Types (DX\_TYPE) for Pre-Exam Diagnoses*

| <b>Diagnosis Code &amp; Label</b>                                                                                                                                                                              | <b>Frequency</b> | <b>DX Label</b>   | <b>DX_TYPE<br/>(code)</b> |
|----------------------------------------------------------------------------------------------------------------------------------------------------------------------------------------------------------------|------------------|-------------------|---------------------------|
| G40.319 Generalized idiopathic epilepsy and epileptic syndromes, intractable, without status epilepticus                                                                                                       | 6                | Seizure Disorders |                           |
| G40.409 Other generalized epilepsy and epileptic syndromes, not intractable, without status epilepticus                                                                                                        | 3                | Seizure Disorders |                           |
| G40.8 Other epilepsy and recurrent seizures (Epilepsies and epileptic syndromes undetermined as to whether they are focal or generalized; Landau-Kleffner syndrome)                                            | 1                | Seizure Disorders |                           |
| G40.801 Other epilepsy, not intractable, with status epilepticus                                                                                                                                               | 1                | Seizure Disorders |                           |
| G40.802 Other epilepsy, not intractable, without status epilepticus (Other epilepsy NOS; Other epilepsy without intractability without status epilepticus)                                                     | 1                | Seizure Disorders |                           |
| G40.804 Other epilepsy, intractable, without status epilepticus                                                                                                                                                | 11               | Seizure Disorders |                           |
| G40.812 Lennox-Gastaut syndrome, not intractable, without status epilepticus                                                                                                                                   | 1                | Seizure Disorders |                           |
| G40.814 Lennox-Gastaut syndrome, intractable, without status epilepticus                                                                                                                                       | 3                | Seizure Disorders |                           |
| G40.89 Other seizures                                                                                                                                                                                          | 2                | Seizure Disorders |                           |
| G40.89 Other seizures (post traumatic seizures (R56.1); recurrent seizures NOS (G40.909); seizure NOS (R56.9))                                                                                                 | 3                | Seizure Disorders |                           |
| G40.901 Epilepsy, unspecified, not intractable, with status epilepticus                                                                                                                                        | 1                | Seizure Disorders |                           |
| G40.909 Epilepsy, unspecified, not intractable, without status epilepticus                                                                                                                                     | 2                | Seizure Disorders |                           |
| G40.909 Epilepsy, unspecified, not intractable, without status epilepticus (Epilepsy NOS; Epileptic convulsions NOS; Epileptic fits NOS; Epileptic seizures NOS; Recurrent seizures NOS; Seizure disorder NOS) | 66               | Seizure Disorders |                           |
| G40.919 Epilepsy, unspecified, intractable, without status epilepticus                                                                                                                                         | 9                | Seizure Disorders |                           |
| G40.A01 Absence epileptic syndrome, not intractable, with status epilepticus                                                                                                                                   | 1                | Seizure Disorders |                           |
| G40.B09 Juvenile myoclonic epilepsy, not intractable, without status epilepticus                                                                                                                               | 2                | Seizure Disorders |                           |
|                                                                                                                                                                                                                |                  | Disorders         | 378                       |



## Supplemental Table 2

Recoding of Original ICD-10-CM Codes into Diagnostic Types (DX\_TYPE) for Pre-Exam Diagnoses

| Diagnosis Code & Label                                                                                                                                                                                                                                                                                                                                                                  | Frequency | DX Label | DX_TYPE (code)  |
|-----------------------------------------------------------------------------------------------------------------------------------------------------------------------------------------------------------------------------------------------------------------------------------------------------------------------------------------------------------------------------------------|-----------|----------|-----------------|
| G43 Migraine (the following terms are to be considered equivalent to intractable: pharmacoresistant (pharmacologically resistant), treatment resistant, refractory (medically) and poorly controlled; code for adverse effect, if applicable, to identify drug (T36-T50 with fifth or sixth character 5); headache NOS (R51); lower half migraine (G44.00); headache syndromes (G44.-)) | 1         |          |                 |
| G43.009 Migraine without aura, not intractable, without status migrainosus (Migraine without aura NOS)                                                                                                                                                                                                                                                                                  | 1         |          |                 |
| G43.70 Chronic migraine without aura, not intractable (Chronic migraine without aura, without refractory migraine)                                                                                                                                                                                                                                                                      | 1         |          |                 |
| G43.709 Chronic migraine without aura, not intractable, without status migrainosus (Chronic migraine without aura NOS)                                                                                                                                                                                                                                                                  | 1         |          |                 |
| G43.909 Migraine, unspecified, not intractable, without status migrainosus (Migraine NOS)                                                                                                                                                                                                                                                                                               | 2         |          |                 |
| G44.329 Chronic post-traumatic headache, not intractable (Chronic post-traumatic headache NOS)                                                                                                                                                                                                                                                                                          | 2         |          |                 |
| G45.4 Transient global amnesia (amnesia NOS (R41.3))                                                                                                                                                                                                                                                                                                                                    | 3         |          |                 |
| G45.9 Transient cerebral ischemic attack, unspecified (Spasm of cerebral artery; TIA; Transient cerebral ischemia NOS)                                                                                                                                                                                                                                                                  | 8         |          |                 |
| G46.2 Posterior cerebral artery syndrome                                                                                                                                                                                                                                                                                                                                                | 1         |          | Cerebrovascular |
| G47.00 Insomnia, unspecified (Insomnia NOS)                                                                                                                                                                                                                                                                                                                                             | 1         |          | Cerebrovascular |
| G47.33 Obstructive sleep apnea (adult) (pediatric) (Obstructive sleep apnea hypopnea; obstructive sleep apnea of newborn (P28.3))                                                                                                                                                                                                                                                       | 2         |          |                 |
| G50.0 Trigeminal neuralgia (Syndrome of paroxysmal facial pain; Tic douloureux)                                                                                                                                                                                                                                                                                                         | 1         |          |                 |
| G56.0 Carpal tunnel syndrome                                                                                                                                                                                                                                                                                                                                                            | 1         |          |                 |
| G56.40 Causalgia of unspecified upper limb                                                                                                                                                                                                                                                                                                                                              | 1         |          |                 |
| G62.0 Drug-induced polyneuropathy (code for adverse effect, if applicable, to identify drug (T36-T50 with fifth or sixth character 5))                                                                                                                                                                                                                                                  | 1         |          |                 |
| G62.9 Polyneuropathy, unspecified (Neuropathy NOS)                                                                                                                                                                                                                                                                                                                                      | 1         |          |                 |

## Supplemental Table 2

Recoding of Original ICD-10-CM Codes into Diagnostic Types (DX\_TYPE) for Pre-Exam Diagnoses

| Diagnosis Code & Label                                                                                                                                                                                                                                                                                                                                                    | Frequency | DX Label | DX_TYPE (code) |
|---------------------------------------------------------------------------------------------------------------------------------------------------------------------------------------------------------------------------------------------------------------------------------------------------------------------------------------------------------------------------|-----------|----------|----------------|
| G71.11 Myotonic muscular dystrophy (Dystrophia myotonica [Steinert]; Myotonia atrophica; Myotonic dystrophy; Proximal myotonic myopathy (PROMM); Steinert disease)                                                                                                                                                                                                        | 1         |          |                |
| G80.8 Other cerebral palsy (Mixed cerebral palsy syndromes)                                                                                                                                                                                                                                                                                                               | 1         |          |                |
| G80.9 Cerebral palsy, unspecified (Cerebral palsy NOS)                                                                                                                                                                                                                                                                                                                    | 1         |          |                |
| G81.94 Hemiplegia, unspecified affecting left nondominant side                                                                                                                                                                                                                                                                                                            | 1         |          |                |
| G82.50 Quadriplegia, unspecified                                                                                                                                                                                                                                                                                                                                          | 1         |          |                |
| G83.9 Paralytic syndrome, unspecified                                                                                                                                                                                                                                                                                                                                     | 1         |          |                |
| G89.2 Chronic pain, not elsewhere classified (causalgia, lower limb (G57.7-); causalgia, upper limb (G56.4-); central pain syndrome (G89.0); chronic pain syndrome (G89.4); complex regional pain syndrome II, lower limb (G57.7-); complex regional pain syndrome II, upper limb (G56.4-); neoplasm related chronic pain (G89.3); reflex sympathetic dystrophy (G90.5-)) | 2         |          |                |
| G89.29 Other chronic pain                                                                                                                                                                                                                                                                                                                                                 | 1         |          |                |
| G90.1 Familial dysautonomia [Riley-Day]                                                                                                                                                                                                                                                                                                                                   | 1         |          |                |
| G91.2 (Idiopathic) normal pressure hydrocephalus (Normal pressure hydrocephalus NOS)                                                                                                                                                                                                                                                                                      | 4         |          |                |
| G91.9 Hydrocephalus, unspecified                                                                                                                                                                                                                                                                                                                                          | 6         |          |                |
| G92 Toxic encephalopathy (Toxic encephalitis; Toxic metabolic encephalopathy; , if applicable, drug induced (T36-T50); (T51-T65) to identify toxic agent)                                                                                                                                                                                                                 | 1         |          |                |
| G93.0 Cerebral cysts (Arachnoid cyst; Porencephalic cyst, acquired; acquired periventricular cysts of newborn (P91.1); congenital cerebral cysts (Q04.6))                                                                                                                                                                                                                 | 5         |          |                |
| G93.1 Anoxic brain damage, not elsewhere classified (cerebral anoxia due to anesthesia during labor and delivery (O74.3); cerebral anoxia due to anesthesia during the puerperium (O89.2); neonatal anoxia (P84))                                                                                                                                                         | 2         |          |                |
| G93.2 Benign intracranial hypertension (hypertensive encephalopathy (I67.4))                                                                                                                                                                                                                                                                                              | 1         |          |                |

Cerebrovascular



**Supplemental Table 2***Recoding of Original ICD-10-CM Codes into Diagnostic Types (DX\_TYPE) for Pre-Exam Diagnoses*

| <b>Diagnosis Code &amp; Label</b>                                                                                                                                                                                                                                                                                                                                                                                                            | <b>Frequency</b> | <b>DX Label</b> | <b>DX_TYPE<br/>(code)</b> |
|----------------------------------------------------------------------------------------------------------------------------------------------------------------------------------------------------------------------------------------------------------------------------------------------------------------------------------------------------------------------------------------------------------------------------------------------|------------------|-----------------|---------------------------|
| overload unrelated to congestive heart failure (E87.70))                                                                                                                                                                                                                                                                                                                                                                                     |                  |                 |                           |
| I60.2 Nontraumatic subarachnoid hemorrhage from anterior communicating artery                                                                                                                                                                                                                                                                                                                                                                | 3                | Cerebrovascular |                           |
| I60.7 Nontraumatic subarachnoid hemorrhage from unspecified intracranial artery (Ruptured (congenital) berry aneurysm; Ruptured (congenital) cerebral aneurysm; Subarachnoid hemorrhage (nontraumatic) from cerebral artery NOS; Subarachnoid hemorrhage (nontraumatic) from communicating artery NOS; berry aneurysm, nonruptured (I67.1))                                                                                                  | 1                | Cerebrovascular |                           |
| I60.8 Other nontraumatic subarachnoid hemorrhage (Meningeal hemorrhage; Rupture of cerebral arteriovenous malformation)                                                                                                                                                                                                                                                                                                                      | 1                | Cerebrovascular |                           |
| I60.9 Nontraumatic subarachnoid hemorrhage, unspecified                                                                                                                                                                                                                                                                                                                                                                                      | 15               | Cerebrovascular |                           |
| I61 Nontraumatic intracerebral hemorrhage (sequelae of intracerebral hemorrhage (I69.1-))                                                                                                                                                                                                                                                                                                                                                    | 1                | Cerebrovascular |                           |
| I61.0 Nontraumatic intracerebral hemorrhage in hemisphere, subcortical (Deep intracerebral hemorrhage (nontraumatic))                                                                                                                                                                                                                                                                                                                        | 1                | Cerebrovascular |                           |
| I61.8 Other nontraumatic intracerebral hemorrhage                                                                                                                                                                                                                                                                                                                                                                                            | 1                | Cerebrovascular |                           |
| I61.9 Nontraumatic intracerebral hemorrhage, unspecified                                                                                                                                                                                                                                                                                                                                                                                     | 7                | Cerebrovascular |                           |
| I62 Other and unspecified nontraumatic intracranial hemorrhage (sequelae of intracranial hemorrhage (I69.2))                                                                                                                                                                                                                                                                                                                                 | 1                | Cerebrovascular |                           |
| I62.00 Nontraumatic subdural hemorrhage, unspecified                                                                                                                                                                                                                                                                                                                                                                                         | 2                | Cerebrovascular |                           |
| I62.9 Nontraumatic intracranial hemorrhage, unspecified                                                                                                                                                                                                                                                                                                                                                                                      | 1                | Cerebrovascular |                           |
| I63 Cerebral infarction (occlusion and stenosis of cerebral and precerebral arteries, resulting in cerebral infarction; code, if applicable, to identify status post administration of tPA (rtPA) in a different facility within the last 24 hours prior to admission to current facility (Z92.82); code, if known, to indicate National Institutes of Health Stroke Scale (NIHSS) score (R29.7-); sequelae of cerebral infarction (I69.3-)) | 1                | Cerebrovascular |                           |

**Supplemental Table 2***Recoding of Original ICD-10-CM Codes into Diagnostic Types (DX\_TYPE) for Pre-Exam Diagnoses*

| <b>Diagnosis Code &amp; Label</b>                                                                                                                                                                             | <b>Frequency</b> | <b>DX Label</b> | <b>DX_TYPE<br/>(code)</b> |
|---------------------------------------------------------------------------------------------------------------------------------------------------------------------------------------------------------------|------------------|-----------------|---------------------------|
| I63.311 Cerebral infarction due to thrombosis of right middle cerebral artery                                                                                                                                 | 1                | Cerebrovascular |                           |
| I63.511 Cerebral infarction due to unspecified occlusion or stenosis of right middle cerebral artery                                                                                                          | 1                | Cerebrovascular |                           |
| I63.512 Cerebral infarction due to unspecified occlusion or stenosis of left middle cerebral artery                                                                                                           | 4                | Cerebrovascular |                           |
| I63.531 Cerebral infarction due to unspecified occlusion or stenosis of right posterior cerebral artery                                                                                                       | 1                | Cerebrovascular |                           |
| I63.532 Cerebral infarction due to unspecified occlusion or stenosis of left posterior cerebral artery                                                                                                        | 1                | Cerebrovascular |                           |
| I63.6 Cerebral infarction due to cerebral venous thrombosis, nonpyogenic                                                                                                                                      | 1                | Cerebrovascular |                           |
| I63.81 Other cerebral infarction due to occlusion or stenosis of small artery (Lacunar infarction)                                                                                                            | 2                | Cerebrovascular |                           |
| I63.9 Cerebral infarction, unspecified                                                                                                                                                                        | 1                | Cerebrovascular |                           |
| I63.9 Cerebral infarction, unspecified (Stroke NOS; transient cerebral ischemic attacks and related syndromes (G45.-))                                                                                        | 41               | Cerebrovascular |                           |
| I67.2 Cerebral atherosclerosis (Atheroma of cerebral and precerebral arteries)                                                                                                                                | 2                | Cerebrovascular |                           |
| I67.4 Hypertensive encephalopathy (insufficiency, NOS, of precerebral arteries (G45.2))                                                                                                                       | 1                | Cerebrovascular |                           |
| I67.5 Moyamoya disease                                                                                                                                                                                        | 11               | Cerebrovascular |                           |
| I67.850 Cerebral autosomal dominant arteriopathy with subcortical infarcts and leukoencephalopathy (CADASIL; any associated diagnoses, such as:; epilepsy (G40.-); stroke (I63.-); vascular dementia (F01.-)) | 1                | Cerebrovascular |                           |
| I67.9 Cerebrovascular disease, unspecified                                                                                                                                                                    | 4                | Cerebrovascular |                           |
| I68.0 Cerebral amyloid angiopathy (underlying amyloidosis (E85.-))                                                                                                                                            | 1                | Cerebrovascular |                           |
| I69.120 Aphasia following nontraumatic intracerebral hemorrhage                                                                                                                                               | 1                | Cerebrovascular |                           |
| I69.3 Sequelae of cerebral infarction (Sequelae of stroke NOS)                                                                                                                                                | 3                | Cerebrovascular |                           |

## Supplemental Table 2

Recoding of Original ICD-10-CM Codes into Diagnostic Types (DX\_TYPE) for Pre-Exam Diagnoses

| Diagnosis Code & Label                                                                                                                                                                                                                                                                     | Frequency | DX Label        | DX_TYPE (code) |
|--------------------------------------------------------------------------------------------------------------------------------------------------------------------------------------------------------------------------------------------------------------------------------------------|-----------|-----------------|----------------|
| I69.30 Unspecified sequelae of cerebral infarction                                                                                                                                                                                                                                         | 34        | Cerebrovascular |                |
| I69.31 Cognitive deficits following cerebral infarction                                                                                                                                                                                                                                    | 1         | Cerebrovascular |                |
| I69.311 Memory deficit following cerebral infarction                                                                                                                                                                                                                                       | 1         | Cerebrovascular |                |
| I69.319 Unspecified symptoms and signs involving cognitive functions following cerebral infarction                                                                                                                                                                                         | 2         | Cerebrovascular |                |
| I69.320 Aphasia following cerebral infarction                                                                                                                                                                                                                                              | 1         | Cerebrovascular |                |
| I69.322 Dysarthria following cerebral infarction (transient ischemic attack (TIA) (G45.9))                                                                                                                                                                                                 | 1         | Cerebrovascular |                |
| I69.80 Unspecified sequelae of other cerebrovascular disease                                                                                                                                                                                                                               | 1         | Cerebrovascular |                |
| I69.9 Sequelae of unspecified cerebrovascular diseases (sequelae of stroke (I69.3); sequelae of traumatic intracranial injury (S06.-))                                                                                                                                                     | 1         | Cerebrovascular |                |
| I69.919 Unspecified symptoms and signs involving cognitive functions following unspecified cerebrovascular disease                                                                                                                                                                         | 1         | Cerebrovascular |                |
| I69.959 Hemiplegia and hemiparesis following unspecified cerebrovascular disease affecting unspecified side                                                                                                                                                                                | 1         | Cerebrovascular |                |
| I72.9 Aneurysm of unspecified site                                                                                                                                                                                                                                                         | 1         | Cerebrovascular |                |
| I73.9 Peripheral vascular disease, unspecified (Intermittent claudication; Peripheral angiopathy NOS; Spasm of artery; atherosclerosis of the extremities (I70.2--I70.7-))                                                                                                                 | 1         | Cerebrovascular |                |
| I77.0 Arteriovenous fistula, acquired (Aneurysmal varix; Arteriovenous aneurysm, acquired; arteriovenous aneurysm NOS (Q27.3-); presence of arteriovenous shunt (fistula) for dialysis (Z99.2); traumatic - see injury of blood vessel by body region; cerebral (I67.1); coronary (I25.4)) | 1         | Cerebrovascular | 181            |
| I82.0 Budd-Chiari syndrome (Hepatic vein thrombosis)                                                                                                                                                                                                                                       | 1         |                 |                |
| I88.1 Chronic lymphadenitis, except mesenteric (Adenitis; Lymphadenitis)                                                                                                                                                                                                                   | 1         |                 |                |

## Supplemental Table 2

Recoding of Original ICD-10-CM Codes into Diagnostic Types (DX\_TYPE) for Pre-Exam Diagnoses

| Diagnosis Code & Label                                                                                                                                                                                                                    | Frequency | DX Label        | DX_TYPE (code) |
|-------------------------------------------------------------------------------------------------------------------------------------------------------------------------------------------------------------------------------------------|-----------|-----------------|----------------|
| K74.69 Other cirrhosis of liver (Cryptogenic cirrhosis (of liver); Macronodular cirrhosis (of liver); Micronodular cirrhosis (of liver); Mixed type cirrhosis (of liver); Portal cirrhosis (of liver); Postnecrotic cirrhosis (of liver)) | 1         |                 |                |
| M34.83 Systemic sclerosis with polyneuropathy                                                                                                                                                                                             | 1         |                 |                |
| M54.12 Radiculopathy, cervical region                                                                                                                                                                                                     | 1         |                 |                |
| M54.16 Radiculopathy, lumbar region                                                                                                                                                                                                       | 1         |                 |                |
| M79.10 Myalgia, unspecified site                                                                                                                                                                                                          | 1         |                 |                |
| M79.7 Fibromyalgia (Fibromyositis; Fibrositis; Myofibrositis)                                                                                                                                                                             | 3         |                 |                |
| M96.1 Postlaminectomy syndrome, not elsewhere classified                                                                                                                                                                                  | 2         |                 |                |
| N18.3 Chronic kidney disease, stage 3 (moderate)                                                                                                                                                                                          | 1         |                 |                |
| N18.5 Chronic kidney disease, stage 5 (chronic kidney disease, stage 5 requiring chronic dialysis (N18.6))                                                                                                                                | 4         |                 |                |
| N18.6 End stage renal disease (Chronic kidney disease requiring chronic dialysis; code to identify dialysis status (Z99.2))                                                                                                               | 8         |                 |                |
| P10.2 Intraventricular hemorrhage due to birth injury                                                                                                                                                                                     | 1         |                 |                |
| P91.0 Neonatal cerebral ischemia                                                                                                                                                                                                          | 1         |                 |                |
| P91.61 Mild hypoxic ischemic encephalopathy [HIE]                                                                                                                                                                                         | 1         |                 |                |
| Q04.6 Congenital cerebral cysts (Porencephaly; Schizencephaly; acquired porencephalic cyst (G93.0))                                                                                                                                       | 1         |                 |                |
| Q27.30 Arteriovenous malformation, site unspecified                                                                                                                                                                                       | 2         | Cerebrovascular |                |
| Q28.2 Arteriovenous malformation of cerebral vessels (Arteriovenous malformation of brain NOS; Congenital arteriovenous cerebral aneurysm (nonruptured))                                                                                  | 2         | Cerebrovascular |                |
| Q28.3 Other malformations of cerebral vessels (Congenital cerebral aneurysm (nonruptured); Congenital malformation of cerebral vessels NOS; Developmental venous anomaly)                                                                 | 2         | Cerebrovascular |                |
| Q79.60 Ehlers-Danlos syndrome, unspecified                                                                                                                                                                                                | 1         |                 |                |
| Q85.01 Neurofibromatosis, type 1 (Von Recklinghausen disease)                                                                                                                                                                             | 1         |                 |                |

## Supplemental Table 2

Recoding of Original ICD-10-CM Codes into Diagnostic Types (DX\_TYPE) for Pre-Exam Diagnoses

| Diagnosis Code & Label                                                                                                                                                           | Frequency | DX Label           | DX_TYPE (code) |
|----------------------------------------------------------------------------------------------------------------------------------------------------------------------------------|-----------|--------------------|----------------|
| Q85.1 Tuberous sclerosis (Bourneville's disease; Epiloia)                                                                                                                        | 2         |                    |                |
| Q85.8 Other phakomatoses, not elsewhere classified (Peutz-Jeghers Syndrome; Sturge-Weber(-Dimitri) syndrome; von Hippel-Lindau syndrome; Meckel-Gruber syndrome (Q61.9))         | 1         |                    |                |
| Q87.11 Prader-Willi syndrome                                                                                                                                                     | 1         |                    |                |
| Q90.9 Down syndrome, unspecified (Trisomy 21 NOS)                                                                                                                                | 1         |                    |                |
| R00.0 Tachycardia, unspecified (Rapid heart beat; Sinoauricular tachycardia NOS; Sinus [sinusal] tachycardia NOS; neonatal tachycardia (P29.11); paroxysmal tachycardia (I47.-)) | 2         |                    |                |
| R20.0 Anesthesia of skin                                                                                                                                                         | 1         |                    |                |
| R25.1 Tremor, unspecified (chorea NOS (G25.5); essential tremor (G25.0); hysterical tremor (F44.4); intention tremor (G25.2))                                                    | 15        | Movement Disorders |                |
| R25.2 Cramp and spasm (carpopedal spasm (R29.0); charley-horse (M62.831); infantile spasms (G40.4-); muscle spasm of back (M62.830); muscle spasm of calf (M62.831))             | 1         |                    |                |
| R25.9 Unspecified abnormal involuntary movements                                                                                                                                 | 3         | Movement Disorders |                |
| R26.81 Unsteadiness on feet                                                                                                                                                      | 2         |                    |                |
| R26.89 Other abnormalities of gait and mobility                                                                                                                                  | 2         |                    |                |
| R26.9 Unspecified abnormalities of gait and mobility                                                                                                                             | 4         |                    |                |
| R27.0 Ataxia, unspecified (ataxia following cerebrovascular disease (I69. with final characters -93))                                                                            | 2         |                    |                |
| R29.6 Repeated falls (Falling; Tendency to fall; at risk for falling (Z91.81); history of falling (Z91.81))                                                                      | 1         |                    |                |
| R40.4 Transient alteration of awareness                                                                                                                                          | 1         |                    |                |
| R41.0 Disorientation, unspecified (Confusion NOS; Delirium NOS)                                                                                                                  | 5         |                    |                |
| R41.3 Other amnesia                                                                                                                                                              | 36        | Other amnesia      |                |
| R41.3 Other amnesia (Amnesia NOS; Memory loss NOS; amnesic disorder due to known physiologic condition (F04); amnesic syndrome due to psychoactive substance use (F10-F19        | 831       |                    | Other amnesia  |



## Supplemental Table 2

Recoding of Original ICD-10-CM Codes into Diagnostic Types (DX\_TYPE) for Pre-Exam Diagnoses

| Diagnosis Code & Label                                                                                                                                                                                  | Frequency | DX Label | DX_TYPE (code)  |
|---------------------------------------------------------------------------------------------------------------------------------------------------------------------------------------------------------|-----------|----------|-----------------|
| with 5th character .6); mild memory disturbance due to known physiological condition (F06.8); transient global amnesia (G45.4))                                                                         |           |          |                 |
| R41.4 Neurologic neglect syndrome (Asomatognosia; Hemi-akinesia; Hemi-inattention; Hemispatial neglect; Left-sided neglect; Sensory neglect; Visuospatial neglect; visuospatial deficit (R41.842))      | 1         |          |                 |
| R41.8 Other symptoms and signs involving cognitive functions and awareness                                                                                                                              | 665       |          |                 |
| R41.81 Age-related cognitive decline (Senility NOS)                                                                                                                                                     | 2         |          |                 |
| R41.82 Altered mental status, unspecified (Change in mental status NOS; altered level of consciousness (R40.-); altered mental status due to known condition - code to condition; delirium NOS (R41.0)) | 2         |          |                 |
| R41.83 Borderline intellectual functioning (IQ level 71 to 84; intellectual disabilities (F70-F79))                                                                                                     | 1         |          |                 |
| R41.84 Other specified cognitive deficit (cognitive deficits as sequelae of cerebrovascular disease (I69.01-, I69.11-, I69.21-, I69.31-, I69.81-, I69.91-))                                             | 1         |          | Cerebrovascular |
| R41.840 Attention and concentration deficit                                                                                                                                                             | 1         |          |                 |
| R41.840 Attention and concentration deficit (attention-deficit hyperactivity disorders (F90.-))                                                                                                         | 41        |          | ADHD            |
| R41.844 Frontal lobe and executive function deficit                                                                                                                                                     | 2         |          |                 |
| R41.89 Other symptoms and signs involving cognitive functions and awareness                                                                                                                             | 11        |          |                 |
| R41.89 Other symptoms and signs involving cognitive functions and awareness (Anosognosia)                                                                                                               | 630       |          |                 |
| R41.9 Unspecified symptoms and signs involving cognitive functions and awareness                                                                                                                        | 3         |          |                 |
| R41.9 Unspecified symptoms and signs involving cognitive functions and awareness (Unspecified neurocognitive disorder)                                                                                  | 87        |          |                 |

**Supplemental Table 2***Recoding of Original ICD-10-CM Codes into Diagnostic Types (DX\_TYPE) for Pre-Exam Diagnoses*

| <b>Diagnosis Code &amp; Label</b>                                                                                                                                                                                                                                                                                                                                                                                                                                                                                                                                                                                                                           | <b>Frequency</b> | <b>DX Label</b> | <b>DX_TYPE<br/>(code)</b> |
|-------------------------------------------------------------------------------------------------------------------------------------------------------------------------------------------------------------------------------------------------------------------------------------------------------------------------------------------------------------------------------------------------------------------------------------------------------------------------------------------------------------------------------------------------------------------------------------------------------------------------------------------------------------|------------------|-----------------|---------------------------|
| R42 Dizziness and giddiness (Light-headedness; Vertigo NOS; vertiginous syndromes (H81.-); vertigo from infrasound (T75.23))                                                                                                                                                                                                                                                                                                                                                                                                                                                                                                                                | 6                |                 |                           |
| R44.1 Visual hallucinations                                                                                                                                                                                                                                                                                                                                                                                                                                                                                                                                                                                                                                 | 1                |                 |                           |
| R47.01 Aphasia (aphasia following cerebrovascular disease (I69. with final characters -20); progressive isolated aphasia (G31.01))                                                                                                                                                                                                                                                                                                                                                                                                                                                                                                                          | 4                |                 |                           |
| R47.89 Other speech disturbances                                                                                                                                                                                                                                                                                                                                                                                                                                                                                                                                                                                                                            | 6                |                 |                           |
| R47.9 Unspecified speech disturbances                                                                                                                                                                                                                                                                                                                                                                                                                                                                                                                                                                                                                       | 3                |                 |                           |
| R48.0 Dyslexia and alexia                                                                                                                                                                                                                                                                                                                                                                                                                                                                                                                                                                                                                                   | 1                |                 |                           |
| R48.2 Apraxia (apraxia following cerebrovascular disease (I69. with final characters -90))                                                                                                                                                                                                                                                                                                                                                                                                                                                                                                                                                                  | 1                |                 |                           |
| R48.8 Other symbolic dysfunctions (Acalculia; Agraphia)                                                                                                                                                                                                                                                                                                                                                                                                                                                                                                                                                                                                     | 1                |                 |                           |
| R49.0 Dysphonia (Hoarseness)                                                                                                                                                                                                                                                                                                                                                                                                                                                                                                                                                                                                                                | 1                |                 |                           |
| R51 Headache (Facial pain NOS; atypical face pain (G50.1); migraine and other headache syndromes (G43-G44); trigeminal neuralgia (G50.0))                                                                                                                                                                                                                                                                                                                                                                                                                                                                                                                   | 3                |                 |                           |
| R52 Pain, unspecified (Acute pain NOS; Generalized pain NOS; Pain NOS; acute and chronic pain, not elsewhere classified (G89.-); localized pain, unspecified type - code to pain by site, such as:; abdomen pain (R10.-); back pain (M54.9); breast pain (N64.4); chest pain (R07.1-R07.9); ear pain (H92.0-); eye pain (H57.1); headache (R51); joint pain (M25.5-); limb pain (M79.6-); lumbar region pain (M54.5); pelvic and perineal pain (R10.2); shoulder pain (M25.51-); spine pain (M54.-); throat pain (R07.0); tongue pain (K14.6); tooth pain (K08.8); renal colic (N23); pain disorders exclusively related to psychological factors (F45.41)) | 1                |                 |                           |
| R53.83 Other fatigue (Fatigue NOS; Lack of energy; Lethargy; Tiredness; exhaustion and fatigue due to depressive episode (F32.-))                                                                                                                                                                                                                                                                                                                                                                                                                                                                                                                           | 1                |                 |                           |

Cerebrovascular

## Supplemental Table 2

Recoding of Original ICD-10-CM Codes into Diagnostic Types (DX\_TYPE) for Pre-Exam Diagnoses

| Diagnosis Code & Label                                                                                                                                                                                                                                                                                                                                                                                                                                                                                                                                          | Frequency | DX Label          | DX_TYPE (code)    |
|-----------------------------------------------------------------------------------------------------------------------------------------------------------------------------------------------------------------------------------------------------------------------------------------------------------------------------------------------------------------------------------------------------------------------------------------------------------------------------------------------------------------------------------------------------------------|-----------|-------------------|-------------------|
| R55 Syncope and collapse (Blackout; Fainting; Vasovagal attack; cardiogenic shock (R57.0); carotid sinus syncope (G90.01); heat syncope (T67.1); neurocirculatory asthenia (F45.8); neurogenic orthostatic hypotension (G90.3); orthostatic hypotension (I95.1); postprocedural shock (T81.1-); psychogenic syncope (F48.8); shock NOS (R57.9); shock complicating or following abortion or ectopic or molar pregnancy (O00-O07, O08.3); shock complicating or following labor and delivery (O75.1); Stokes-Adams attack (I45.9); unconsciousness NOS (R40.2-)) | 1         |                   |                   |
| R56.1 Post traumatic seizures (post traumatic epilepsy (G40.-))                                                                                                                                                                                                                                                                                                                                                                                                                                                                                                 | 1         | Seizure Disorders |                   |
| R56.9 Unspecified convulsions                                                                                                                                                                                                                                                                                                                                                                                                                                                                                                                                   | 1         | Seizure Disorders |                   |
| R56.9 Unspecified convulsions (Convulsion disorder; Fit NOS; Recurrent convulsions; Seizure(s) (convulsive) NOS)                                                                                                                                                                                                                                                                                                                                                                                                                                                | 60        |                   | Seizure Disorders |
| R62.5 Other and unspecified lack of expected normal physiological development in childhood (HIV disease resulting in failure to thrive (B20); physical retardation due to malnutrition (E45))                                                                                                                                                                                                                                                                                                                                                                   | 1         |                   |                   |
| R68.89 Other general symptoms and signs                                                                                                                                                                                                                                                                                                                                                                                                                                                                                                                         | 3         |                   |                   |
| R69 Illness, unspecified (Unknown and unspecified cases of morbidity)                                                                                                                                                                                                                                                                                                                                                                                                                                                                                           | 2         |                   |                   |
| R76.8 Other specified abnormal immunological findings in serum (Raised level of immunoglobulins NOS)                                                                                                                                                                                                                                                                                                                                                                                                                                                            | 1         |                   |                   |
| R90.82 White matter disease, unspecified                                                                                                                                                                                                                                                                                                                                                                                                                                                                                                                        | 3         |                   |                   |
| R90.89 Other abnormal findings on diagnostic imaging of central nervous system                                                                                                                                                                                                                                                                                                                                                                                                                                                                                  | 1         |                   |                   |
| R90.89 Other abnormal findings on diagnostic imaging of central nervous system (Other cerebrovascular abnormality found on diagnostic imaging of central nervous system)                                                                                                                                                                                                                                                                                                                                                                                        | 2         |                   |                   |
| S02.92S Unspecified fracture of facial bones, sequela                                                                                                                                                                                                                                                                                                                                                                                                                                                                                                           | 1         |                   |                   |
| S06.0 Concussion (Commotio cerebri; concussion with other intracranial injuries classified in subcategories S06.1- to S06.6- , S06.81- and S06.82- code to specified intracranial injury)                                                                                                                                                                                                                                                                                                                                                                       | 1         |                   |                   |
|                                                                                                                                                                                                                                                                                                                                                                                                                                                                                                                                                                 |           | TBI/CHI           |                   |

**Supplemental Table 2***Recoding of Original ICD-10-CM Codes into Diagnostic Types (DX\_TYPE) for Pre-Exam Diagnoses*

| <b>Diagnosis Code &amp; Label</b>                                                                                                                                      | <b>Frequency</b> | <b>DX Label</b> | <b>DX_TYPE<br/>(code)</b> |
|------------------------------------------------------------------------------------------------------------------------------------------------------------------------|------------------|-----------------|---------------------------|
| S06.0X Concussion                                                                                                                                                      | 7                | TBI/CHI         |                           |
| S06.0X0A Concussion without loss of consciousness, initial encounter                                                                                                   | 10               | TBI/CHI         |                           |
| S06.0X0D Concussion without loss of consciousness, subsequent encounter                                                                                                | 5                | TBI/CHI         |                           |
| S06.0X0S Concussion without loss of consciousness, sequela                                                                                                             | 3                | TBI/CHI         |                           |
| S06.0X1A Concussion with loss of consciousness of 30 minutes or less, initial encounter                                                                                | 3                | TBI/CHI         |                           |
| S06.0X1S Concussion with loss of consciousness of 30 minutes or less, sequela                                                                                          | 4                | TBI/CHI         |                           |
| S06.0X9A Concussion with loss of consciousness of unspecified duration, initial encounter (Concussion NOS)                                                             | 14               | TBI/CHI         |                           |
| S06.0X9S Concussion with loss of consciousness of unspecified duration, sequela (Concussion NOS)                                                                       | 3                | TBI/CHI         |                           |
| S06.2 Diffuse traumatic brain injury (Diffuse axonal brain injury; traumatic diffuse cerebral edema (S06.1X-))                                                         | 1                | TBI/CHI         |                           |
| S06.2X3S Diffuse traumatic brain injury with loss of consciousness of 1 hour to 5 hours 59 minutes, sequela                                                            | 1                | TBI/CHI         |                           |
| S06.2X5S Diffuse traumatic brain injury with loss of consciousness greater than 24 hours with return to pre-existing conscious levels, sequela                         | 1                | TBI/CHI         |                           |
| S06.2X9A Diffuse traumatic brain injury with loss of consciousness of unspecified duration, initial encounter (Diffuse traumatic brain injury NOS)                     | 1                | TBI/CHI         |                           |
| S06.2X9S Diffuse traumatic brain injury with loss of consciousness of unspecified duration, sequela (Diffuse traumatic brain injury NOS)                               | 3                | TBI/CHI         |                           |
| S06.302S Unspecified focal traumatic brain injury with loss of consciousness of 31 minutes to 59 minutes, sequela                                                      | 2                | TBI/CHI         |                           |
| S06.309A Unspecified focal traumatic brain injury with loss of consciousness of unspecified duration, initial encounter (Unspecified focal traumatic brain injury NOS) | 2                | TBI/CHI         |                           |

**Supplemental Table 2***Recoding of Original ICD-10-CM Codes into Diagnostic Types (DX\_TYPE) for Pre-Exam Diagnoses*

| <b>Diagnosis Code &amp; Label</b>                                                                                                                                                                                                            | <b>Frequency</b> | <b>DX Label</b> | <b>DX_TYPE<br/>(code)</b> |
|----------------------------------------------------------------------------------------------------------------------------------------------------------------------------------------------------------------------------------------------|------------------|-----------------|---------------------------|
| S06.309D Unspecified focal traumatic brain injury with loss of consciousness of unspecified duration, subsequent encounter (Unspecified focal traumatic brain injury NOS)                                                                    | 1                | TBI/CHI         |                           |
| S06.369A Traumatic hemorrhage of cerebrum, unspecified, with loss of consciousness of unspecified duration, initial encounter (Traumatic hemorrhage of cerebrum NOS)                                                                         | 1                | TBI/CHI         |                           |
| S06.4X1D Epidural hemorrhage with loss of consciousness of 30 minutes or less, subsequent encounter                                                                                                                                          | 1                | TBI/CHI         |                           |
| S06.4X9A Epidural hemorrhage with loss of consciousness of unspecified duration, initial encounter (Epidural hemorrhage NOS)                                                                                                                 | 1                | TBI/CHI         |                           |
| S06.5X9A Traumatic subdural hemorrhage with loss of consciousness of unspecified duration, initial encounter (Traumatic subdural hemorrhage NOS)                                                                                             | 29               | TBI/CHI         |                           |
| S06.6X0A Traumatic subarachnoid hemorrhage without loss of consciousness, initial encounter                                                                                                                                                  | 1                | TBI/CHI         |                           |
| S06.6X9A Traumatic subarachnoid hemorrhage with loss of consciousness of unspecified duration, initial encounter (Traumatic subarachnoid hemorrhage NOS)                                                                                     | 2                | TBI/CHI         |                           |
| S06.899S Other specified intracranial injury with loss of consciousness of unspecified duration, sequela                                                                                                                                     | 1                | TBI/CHI         |                           |
| S06.9 Unspecified intracranial injury (Brain injury NOS; Head injury NOS with loss of consciousness; Traumatic brain injury NOS; conditions classifiable to S06.0- to S06.8-code to specified intracranial injury; head injury NOS (S09.90)) | 4                | TBI/CHI         |                           |
| S06.9X Unspecified intracranial injury                                                                                                                                                                                                       | 1                |                 |                           |
| S06.9X0A Unspecified intracranial injury without loss of consciousness, initial encounter                                                                                                                                                    | 2                | TBI/CHI         |                           |
| S06.9X0D Unspecified intracranial injury without loss of consciousness, subsequent encounter                                                                                                                                                 | 13               | TBI/CHI         |                           |
| S06.9X0S Unspecified intracranial injury without loss of consciousness, sequela                                                                                                                                                              | 6                | TBI/CHI         |                           |

**Supplemental Table 2***Recoding of Original ICD-10-CM Codes into Diagnostic Types (DX\_TYPE) for Pre-Exam Diagnoses*

| <b>Diagnosis Code &amp; Label</b>                                                                                                                                                          | <b>Frequency</b> | <b>DX Label</b> | <b>DX_TYPE<br/>(code)</b> |
|--------------------------------------------------------------------------------------------------------------------------------------------------------------------------------------------|------------------|-----------------|---------------------------|
| S06.9X1A Unspecified intracranial injury with loss of consciousness of 30 minutes or less, initial encounter                                                                               | 3                | TBI/CHI         |                           |
| S06.9X1D Unspecified intracranial injury with loss of consciousness of 30 minutes or less, subsequent encounter                                                                            | 6                | TBI/CHI         |                           |
| S06.9X1S Unspecified intracranial injury with loss of consciousness of 30 minutes or less, sequela                                                                                         | 4                | TBI/CHI         |                           |
| S06.9X2A Unspecified intracranial injury with loss of consciousness of 31 minutes to 59 minutes, initial encounter                                                                         | 1                | TBI/CHI         |                           |
| S06.9X3A Unspecified intracranial injury with loss of consciousness of 1 hour to 5 hours 59 minutes, initial encounter                                                                     | 1                | TBI/CHI         |                           |
| S06.9X3S Unspecified intracranial injury with loss of consciousness of 1 hour to 5 hours 59 minutes, sequela                                                                               | 1                | TBI/CHI         |                           |
| S06.9X5A Unspecified intracranial injury with loss of consciousness greater than 24 hours with return to pre-existing conscious level, initial encounter                                   | 4                | TBI/CHI         |                           |
| S06.9X5D Unspecified intracranial injury with loss of consciousness greater than 24 hours with return to pre-existing conscious level, subsequent encounter                                | 1                | TBI/CHI         |                           |
| S06.9X5S Unspecified intracranial injury with loss of consciousness greater than 24 hours with return to pre-existing conscious level, sequela                                             | 2                | TBI/CHI         |                           |
| S06.9X9A Unspecified intracranial injury with loss of consciousness of unspecified duration, initial encounter                                                                             | 67               | TBI/CHI         |                           |
| S06.9X9D Unspecified intracranial injury with loss of consciousness of unspecified duration, subsequent encounter                                                                          | 1                | TBI/CHI         |                           |
| S06.9X9S Unspecified intracranial injury with loss of consciousness of unspecified duration, sequela                                                                                       | 15               | TBI/CHI         |                           |
| S09.90XA Unspecified injury of head, initial encounter (Head injury NOS; brain injury NOS (S06.9-); head injury NOS with loss of consciousness (S06.9-); intracranial injury NOS (S06.9-)) | 8                | TBI/CHI         |                           |

## Supplemental Table 2

Recoding of Original ICD-10-CM Codes into Diagnostic Types (DX\_TYPE) for Pre-Exam Diagnoses

| Diagnosis Code & Label                                                                                                                                                                                                                                                                                                                                                                                                                      | Frequency | DX Label | DX_TYPE (code) |
|---------------------------------------------------------------------------------------------------------------------------------------------------------------------------------------------------------------------------------------------------------------------------------------------------------------------------------------------------------------------------------------------------------------------------------------------|-----------|----------|----------------|
| S09.90XD Unspecified injury of head, subsequent encounter (Head injury NOS; brain injury NOS (S06.9-); head injury NOS with loss of consciousness (S06.9-); intracranial injury NOS (S06.9-))                                                                                                                                                                                                                                               | 3         | TBI/CHI  |                |
| S09.90XS Unspecified injury of head, sequela (Head injury NOS; brain injury NOS (S06.9-); head injury NOS with loss of consciousness (S06.9-); intracranial injury NOS (S06.9-))                                                                                                                                                                                                                                                            | 3         | TBI/CHI  |                |
| S14.105S Unspecified injury at C5 level of cervical spinal cord, sequela                                                                                                                                                                                                                                                                                                                                                                    | 1         |          |                |
| U07.1 2019-nCoV acute respiratory disease                                                                                                                                                                                                                                                                                                                                                                                                   | 64        |          |                |
| V87.7A Person injured in collision between other specified motor vehicles (traffic), initial encounter                                                                                                                                                                                                                                                                                                                                      | 1         |          |                |
| V87.7D Person injured in collision between other specified motor vehicles (traffic), subsequent encounter                                                                                                                                                                                                                                                                                                                                   | 1         |          |                |
| V89.2D Person injured in unspecified motor-vehicle accident, traffic, subsequent encounter (Motor-vehicle accident [MVA] NOS; Road (traffic) accident [RTA] NOS)                                                                                                                                                                                                                                                                            | 1         |          |                |
| W34.00A Accidental discharge from unspecified firearms or gun, initial encounter (Discharge from firearm NOS; Gunshot wound NOS; Shot NOS)                                                                                                                                                                                                                                                                                                  | 1         |          |                |
| Z00.00 Encounter for general adult medical examination without abnormal findings (Encounter for adult health check-up NOS)                                                                                                                                                                                                                                                                                                                  | 1         |          |                |
| Z01.818 Encounter for other preprocedural examination                                                                                                                                                                                                                                                                                                                                                                                       | 3         |          |                |
| Z13.41 Encounter for autism screening                                                                                                                                                                                                                                                                                                                                                                                                       | 1         |          |                |
| Z13.850 Encounter for screening for traumatic brain injury                                                                                                                                                                                                                                                                                                                                                                                  | 42        | TBI/CHI  |                |
| Z21 Asymptomatic human immunodeficiency virus [HIV] infection status (HIV positive NOS; Human immunodeficiency virus [HIV] disease complicating pregnancy, childbirth and the puerperium, if applicable (O98.7-); acquired immunodeficiency syndrome (B20); contact with human immunodeficiency virus [HIV] (Z20.6); exposure to human immunodeficiency virus [HIV] (Z20.6); human immunodeficiency virus [HIV] disease (B20); inconclusive | 1         |          |                |

**Supplemental Table 2***Recoding of Original ICD-10-CM Codes into Diagnostic Types (DX\_TYPE) for Pre-Exam Diagnoses*

| <b>Diagnosis Code &amp; Label</b>                                                                                                                                                                                                                                                                                                                           | <b>Frequency</b> | <b>DX Label</b> | <b>DX_TYPE<br/>(code)</b> |
|-------------------------------------------------------------------------------------------------------------------------------------------------------------------------------------------------------------------------------------------------------------------------------------------------------------------------------------------------------------|------------------|-----------------|---------------------------|
| laboratory evidence of human immunodeficiency virus [HIV] (R75))                                                                                                                                                                                                                                                                                            |                  |                 |                           |
| Z55.8 Other problems related to education and literacy (Problems related to inadequate teaching)                                                                                                                                                                                                                                                            | 1                |                 |                           |
| Z55.9 Problems related to education and literacy, unspecified (Academic problems NOS)                                                                                                                                                                                                                                                                       | 1                |                 |                           |
| Z76.82 Awaiting organ transplant status (Patient waiting for organ availability)                                                                                                                                                                                                                                                                            | 1                |                 |                           |
| Z82.0 Family history of epilepsy and other diseases of the nervous system (Conditions classifiable to G00-G99)                                                                                                                                                                                                                                              | 2                |                 |                           |
| Z85.841 Personal history of malignant neoplasm of brain                                                                                                                                                                                                                                                                                                     | 2                |                 |                           |
| Z86.018 Personal history of other benign neoplasm                                                                                                                                                                                                                                                                                                           | 1                |                 |                           |
| Z86.59 Personal history of other mental and behavioral disorders                                                                                                                                                                                                                                                                                            | 6                |                 |                           |
| Z86.73 Personal history of transient ischemic attack (TIA), and cerebral infarction without residual deficits (Personal history of prolonged reversible ischemic neurological deficit (PRIND); Personal history of stroke NOS without residual deficits; personal history of traumatic brain injury (Z87.820); sequelae of cerebrovascular disease (I69.-)) | 6                |                 |                           |
| Z86.79 Personal history of other diseases of the circulatory system                                                                                                                                                                                                                                                                                         | 1                |                 |                           |
| Z87.730 Personal history of (corrected) cleft lip and palate                                                                                                                                                                                                                                                                                                | 1                |                 |                           |
| Z87.82 Personal history of other (healed) physical injury and trauma (Conditions classifiable to S00-T88, except traumatic fractures)                                                                                                                                                                                                                       | 1                |                 |                           |
| Z87.820 Personal history of traumatic brain injury                                                                                                                                                                                                                                                                                                          | 1                | TBI/CHI         |                           |



**Supplemental Table 2***Recoding of Original ICD-10-CM Codes into Diagnostic Types (DX\_TYPE) for Pre-Exam Diagnoses*

| <b>Diagnosis Code &amp; Label</b>                                                                                                                                    | <b>Frequency</b> | <b>DX Label</b> | <b>DX_TYPE<br/>(code)</b> |
|----------------------------------------------------------------------------------------------------------------------------------------------------------------------|------------------|-----------------|---------------------------|
| Z87.820 Personal history of traumatic brain injury (personal history of transient ischemic attack (TIA), and cerebral infarction without residual deficits (Z86.73)) | 24               | TBI/CHI         |                           |
| Z92.89 Personal history of other medical treatment                                                                                                                   | 1                |                 |                           |
| Z94.81 Bone marrow transplant status                                                                                                                                 | 1                |                 |                           |
| Z98.2 Presence of cerebrospinal fluid drainage device (Presence of CSF shunt)                                                                                        | 1                |                 |                           |
| Z98.89 Other specified postprocedural states                                                                                                                         | 1                |                 |                           |
| Z98.890 Other specified postprocedural states (Personal history of surgery, not elsewhere classified)                                                                | 2                |                 |                           |
|                                                                                                                                                                      |                  |                 |                           |
