# Supplementary material
Source: PubMed Central journal article supplement (PMC9945479)
Supplement: NIHMS1868877-supplement-Supplemental_Material_4.pdf [file NIHMS1868877-supplement-Supplemental_Material_4.pdf]

**Supplemental Table 3***Descriptive Statistics for Original Variables Used in Confirmatory Factor Analyses*

| Test Variable | Test or Battery Name                                                               | N    | M     | SD    | Min | Max |
|---------------|------------------------------------------------------------------------------------|------|-------|-------|-----|-----|
| <b>CVLT3</b>  |                                                                                    |      |       |       |     |     |
|               | Cued Recall Intrusions scaled score                                                | 1281 | 9.51  | 3.14  | 1   | 14  |
|               | Free Recall Intrusions scaled score                                                | 1281 | 9.46  | 3.28  | 1   | 14  |
|               | Total Intrusions (All Recall Trials) scaled score                                  | 1281 | 9.4   | 3.26  | 1   | 14  |
|               | List A Trial 1 Total Correct Scaled Score                                          | 1281 | 8.99  | 3.02  | 1   | 18  |
|               | Trials 1-5 Standard Score (Trials 1-4 on Brief Form)                               | 1281 | 96.48 | 17.12 | 45  | 140 |
|               | Trial 1-5 Learning Slope Analysis scaled score                                     | 1296 | 10.29 | 3.09  | 1   | 18  |
|               | % Recall Middle scaled score                                                       | 1297 | 8.85  | 2.96  | 1   | 18  |
|               | % Recall Primacy scaled score                                                      | 1297 | 10.13 | 3.16  | 1   | 19  |
|               | Recall Consistency scaled score                                                    | 1297 | 10.34 | 3.15  | 1   | 19  |
|               | % Recall Recency scaled score                                                      | 1297 | 10.99 | 3.28  | 1   | 19  |
|               | Semantic Clustering (Chance Adjusted) scaled score                                 | 1297 | 9.58  | 3.12  | 2   | 18  |
|               | Serial Clustering (Chance Adjusted) scaled score                                   | 1297 | 10.32 | 3.23  | 1   | 19  |
|               | List A Trial 2 Total Correct Scaled Score                                          | 1280 | 9.51  | 3.05  | 1   | 18  |
|               | List A Trial 3 Total Correct Scaled Score                                          | 1281 | 9.59  | 3.25  | 1   | 17  |
|               | List A Trial 4 Total Correct Scaled Score                                          | 1281 | 9.61  | 3.39  | 1   | 17  |
|               | List A Trial 5 Total Correct Scaled Score                                          | 1296 | 9.59  | 3.33  | 1   | 16  |
|               | List B Immediate Free Recall Response Total Correct Scaled Score                   | 1296 | 9.41  | 2.91  | 1   | 17  |
|               | Long-Delay Cued Recall Response Total Correct scaled score                         | 1281 | 9.35  | 3.44  | 1   | 17  |
|               | Long-Delay Free Recall Response Total Correct Scaled Score                         | 1281 | 9.3   | 3.4   | 1   | 16  |
|               | Long-Delay Forced-Choice Recognition Total Correct (Total Hits)                    | 1301 | 15.58 | 1.38  | 6   | 16  |
|               | Total Recognition Discriminability d' (Hits vs. Total False Positive) scaled score | 1282 | 9.02  | 3.22  | 1   | 15  |
|               | Long-Delay Yes/No Recognition - Total False Positives scaled score                 | 1282 | 9.4   | 3.03  | 1   | 14  |
|               | Long-Delay Yes/No Recognition - Total Correct scaled score                         | 1282 | 9.14  | 3.3   | 1   | 14  |
|               | Total Response Bias scaled score                                                   | 1297 | 10.52 | 3.13  | 1   | 19  |
|               | Total Repetitions (All Recall Trials) scaled score                                 | 1281 | 10.53 | 2.76  | 1   | 15  |
|               | Short-Delay Cued Recall Response Total Correct Scaled Score                        | 1296 | 9.75  | 3.53  | 1   | 18  |
|               | Short-Delay Free Recall Response Total Correct Scaled Score                        | 1281 | 9.57  | 3.46  | 1   | 17  |
| <b>D-KEFS</b> |                                                                                    |      |       |       |     |     |
|               | Color-Word Interference Test : Color Naming - scaled                               | 1608 | 8.4   | 3.44  | 1   | 15  |
|               | Color-Word Interference Test : Inhibition - scaled                                 | 1609 | 9.55  | 3.81  | 1   | 19  |
|               | Color-Word Interference Test : Inhibition/Switching - scaled                       | 1616 | 9.2   | 3.79  | 1   | 17  |
|               | Color-Word Interference Test : Word Reading - scaled                               | 1608 | 9.14  | 3.37  | 1   | 15  |

**Supplemental Table 3***Descriptive Statistics for Original Variables Used in Confirmatory Factor Analyses*

| <b>Test or Battery Name</b>                                                | <b>N</b> | <b>M</b> | <b>SD</b> | <b>Min</b> | <b>Max</b> |
|----------------------------------------------------------------------------|----------|----------|-----------|------------|------------|
| <b>Test Variable</b>                                                       |          |          |           |            |            |
| Trail Making Test : Letter Sequencing - scaled                             | 1812     | 9.5      | 3.92      | 1          | 16         |
| Trail Making Test : Motor Speed - scaled                                   | 1832     | 10.96    | 2.56      | 1          | 15         |
| Trail Making Test : Number-Letter Switching - scaled                       | 1813     | 8.58     | 3.99      | 1          | 15         |
| Trail Making Test : Number Sequencing - scaled                             | 1831     | 9.8      | 3.84      | 1          | 15         |
| Trail Making Test : Visual Scanning - scaled                               | 1830     | 9.51     | 3.56      | 1          | 18         |
| Verbal Fluency Test (Alternate) : Category Fluency Total Correct - scaled  | 1881     | 7.18     | 4.55      | 1          | 19         |
| Verbal Fluency Test (Alternate) : Switching Accuracy - scaled              | 1913     | 9.24     | 2.2       | 5          | 14         |
| Verbal Fluency Test (Alternate) : Letter Fluency Total Correct - scaled    | 1882     | 8.46     | 3.69      | 2          | 17         |
| Verbal Fluency Test (Standard) : Category Fluency Total Correct - scaled   | 1543     | 9.81     | 4.1       | 1          | 19         |
| Verbal Fluency Test (Standard) : Category Switching Total Correct - scaled | 1578     | 9.51     | 3.97      | 1          | 19         |
| Verbal Fluency Test (Standard) : Letter Fluency Total Correct - scaled     | 1537     | 9.54     | 3.94      | 1          | 19         |
| <b>WAIS-IV</b>                                                             |          |          |           |            |            |
| Arithmetic (AR) Scaled Score                                               | 1352     | 9.17     | 3.14      | 1          | 19         |
| Block Design (BD) Scaled Score                                             | 721      | 8.74     | 3.01      | 1          | 18         |
| Coding (CD) Scaled Score                                                   | 577      | 8.58     | 3.23      | 1          | 19         |
| Digit Span Backward (DB) Scaled Score                                      | 59       | 9.17     | 2.77      | 1          | 19         |
| Digit Span Forward (DF) Scaled Score                                       | 61       | 9.23     | 3.03      | 1          | 19         |
| Digit Span Sequencing (DQ) Scaled Score                                    | 61       | 8.8      | 2.96      | 1          | 18         |
| Digit Span (DS) Scaled Score                                               | 63       | 8.84     | 3.02      | 1          | 19         |
| Full Scale IQ Scaled Score (Index Score)                                   | 1574     | 98.78    | 16.11     | 56         | 137        |
| General Ability Scaled Score                                               | 870      | 97.77    | 16.99     | 49         | 147        |
| Information (IN) Scaled Score                                              | 1117     | 9.71     | 3.25      | 3          | 19         |
| Letter-Number Seq. (LN) Scaled Score                                       | 1846     | 8.77     | 3.02      | 1          | 19         |
| Matrix Reasoning (MR) Scaled Score                                         | 478      | 9.9      | 3.33      | 1          | 19         |
| Perceptual Reasoning Scaled Score (Index Score)                            | 813      | 96.4     | 16.57     | 50         | 144        |
| Processing Speed Scaled Score (Index Score)                                | 1132     | 94.74    | 16.21     | 50         | 146        |
| Similarity (SI) Scaled Score                                               | 272      | 10       | 3.15      | 1          | 19         |
| Symbol Span (SS) Scaled Score                                              | 1108     | 8.91     | 3.34      | 1          | 19         |
| Vocabulary (VC) Scaled Score                                               | 964      | 10.24    | 3.16      | 2          | 19         |
| Verbal Comprehension Scaled Score (Index Score)                            | 385      | 99.84    | 16.57     | 51         | 150        |
| Visual Puzzles (VP) Scaled Score                                           | 1653     | 10.05    | 3.04      | 1          | 19         |
| Working Memory Scaled Score (Index Score)                                  | 1357     | 95.43    | 15.48     | 55         | 145        |
| <b>WMS-IV</b>                                                              |          |          |           |            |            |
| Logical Memory I Scaled Score                                              | 348      | 8.59     | 3.52      | 1          | 18         |
| Logical Memory II Scaled Score                                             | 353      | 8.08     | 3.66      | 1          | 17         |

**Supplemental Table 3***Descriptive Statistics for Original Variables Used in Confirmatory Factor Analyses*

| <b>Test or Battery Name</b>                             | <b>N</b> | <b>M</b> | <b>SD</b> | <b>Min</b> | <b>Max</b> |
|---------------------------------------------------------|----------|----------|-----------|------------|------------|
| Test Variable                                           |          |          |           |            |            |
| Logical Memory II Recognition Total Raw Score           | 341      | 21.45    | 4.21      | 8          | 30         |
| Visual Reproduction I Scaled Score                      | 824      | 8.47     | 3.45      | 1          | 19         |
| Visual Reproduction II Scaled Score                     | 828      | 8.16     | 3.74      | 1          | 19         |
| Visual Reproduction II Recognition Total Raw Score      | 819      | 4.57     | 1.87      | 0          | 7          |
| Verbal Paired Associates I Scaled Score                 | 1653     | 8.2      | 2.97      | 1          | 18         |
| Verbal Paired Associates II Scaled Score                | 1655     | 7.98     | 3.48      | 1          | 15         |
| Verbal Paired Associates II Recognition Total Raw Score | 1655     | 35.55    | 4.63      | 10         | 40         |
