# Supplementary material
Source: PubMed Central journal article supplement (PMC9945479)
Supplement: NIHMS1868877-supplement-Supplemental_Material_5.pdf [file NIHMS1868877-supplement-Supplemental_Material_5.pdf]

## Supplemental Table 4

### Correlations among Manifest Variables for Each Instrument, by Sample

#### Correlations Among CVLT3 Variables

For NNN sample

|         | LA1COR | LBCOR | LA15MRG | LA5COR | LA15SMC |
|---------|--------|-------|---------|--------|---------|
| LA1COR  | 1.000  |       |         |        |         |
| LBCOR   | 0.533  | 1.000 |         |        |         |
| LA15MRG | 0.405  | 0.317 | 1.000   |        |         |
| LA5COR  | 0.528  | 0.465 | 0.524   | 1.000  |         |
| LA15SMC | 0.314  | 0.213 | 0.419   | 0.476  | 1.000   |
| LA15RCN | 0.386  | 0.376 | 0.250   | 0.709  | 0.356   |
| SDFCOR  | 0.541  | 0.438 | 0.531   | 0.833  | 0.535   |
| SDCCOR  | 0.547  | 0.440 | 0.515   | 0.809  | 0.535   |
| LDFCOR  | 0.541  | 0.471 | 0.513   | 0.819  | 0.497   |
| LDCCOR  | 0.548  | 0.467 | 0.520   | 0.808  | 0.497   |
| LDRCHIT | 0.335  | 0.287 | 0.355   | 0.538  | 0.260   |
| INT     | 0.288  | 0.223 | 0.145   | 0.341  | 0.174   |
| LDRCFP  | 0.425  | 0.278 | 0.326   | 0.570  | 0.275   |

|         | Correlations<br>LA15RCN | SDFCOR | SDCCOR | LDFCOR | LDCCOR |
|---------|-------------------------|--------|--------|--------|--------|
| LA15RCN | 1.000                   |        |        |        |        |
| SDFCOR  | 0.616                   | 1.000  |        |        |        |
| SDCCOR  | 0.589                   | 0.883  | 1.000  |        |        |
| LDFCOR  | 0.618                   | 0.893  | 0.883  | 1.000  |        |
| LDCCOR  | 0.577                   | 0.875  | 0.926  | 0.916  | 1.000  |
| LDRCHIT | 0.317                   | 0.578  | 0.593  | 0.607  | 0.629  |
| INT     | 0.209                   | 0.387  | 0.378  | 0.412  | 0.400  |
| LDRCFP  | 0.432                   | 0.593  | 0.568  | 0.608  | 0.593  |

|         | Correlations<br>LDRCHIT | INT   | LDRCFP |
|---------|-------------------------|-------|--------|
| LDRCHIT | 1.000                   |       |        |
| INT     | 0.268                   | 1.000 |        |
| LDRCFP  | 0.223                   | 0.497 | 1.000  |

## Correlations Among CVLT3 Variables

For Pearson sample

|         | Correlations |       |         |        |         |
|---------|--------------|-------|---------|--------|---------|
|         | LA1COR       | LBCOR | LA15MRG | LA5COR | LA15SMC |
| LA1COR  | 1.000        |       |         |        |         |
| LBCOR   | 0.340        | 1.000 |         |        |         |
| LA15MRG | 0.313        | 0.196 | 1.000   |        |         |
| LA5COR  | 0.432        | 0.431 | 0.415   | 1.000  |         |
| LA15SMC | 0.364        | 0.188 | 0.353   | 0.494  | 1.000   |
| LA15RCN | 0.257        | 0.261 | 0.149   | 0.642  | 0.364   |
| SDFCOR  | 0.458        | 0.319 | 0.412   | 0.778  | 0.470   |
| SDCCOR  | 0.458        | 0.320 | 0.382   | 0.745  | 0.525   |
| LDFCOR  | 0.452        | 0.341 | 0.428   | 0.783  | 0.522   |
| LDCCOR  | 0.447        | 0.323 | 0.396   | 0.738  | 0.510   |
| LDRCHIT | 0.279        | 0.185 | 0.290   | 0.470  | 0.250   |
| INT     | 0.144        | 0.063 | 0.071   | 0.235  | 0.155   |
| LDRCFP  | 0.314        | 0.195 | 0.275   | 0.502  | 0.302   |

|         | Correlations |        |        |        |        |
|---------|--------------|--------|--------|--------|--------|
|         | LA15RCN      | SDFCOR | SDCCOR | LDFCOR | LDCCOR |
| LA15RCN | 1.000        |        |        |        |        |
| SDFCOR  | 0.517        | 1.000  |        |        |        |
| SDCCOR  | 0.479        | 0.811  | 1.000  |        |        |
| LDFCOR  | 0.537        | 0.829  | 0.830  | 1.000  |        |
| LDCCOR  | 0.476        | 0.797  | 0.890  | 0.862  | 1.000  |
| LDRCHIT | 0.240        | 0.518  | 0.539  | 0.545  | 0.569  |
| INT     | 0.200        | 0.295  | 0.308  | 0.302  | 0.311  |
| LDRCFP  | 0.354        | 0.539  | 0.524  | 0.554  | 0.539  |

|         | Correlations |       |        |
|---------|--------------|-------|--------|
|         | LDRCHIT      | INT   | LDRCFP |
| LDRCHIT | 1.000        |       |        |
| INT     | 0.162        | 1.000 |        |
| LDRCFP  | 0.156        | 0.474 | 1.000  |

## Correlations Among D-KEFS Variables

For NNN sample

|          | Correlations |         |          |         |         |
|----------|--------------|---------|----------|---------|---------|
|          | D_CW_CN      | D_CW_IN | D_CW_ISW | D_CW_WR | D_TM_LS |
| D_CW_CN  | 1.000        |         |          |         |         |
| D_CW_IN  | 0.694        | 1.000   |          |         |         |
| D_CW_ISW | 0.601        | 0.724   | 1.000    |         |         |
| D_CW_WR  | 0.707        | 0.633   | 0.587    | 1.000   |         |
| D_TM_LS  | 0.558        | 0.618   | 0.505    | 0.459   | 1.000   |
| D_TM_MS  | 0.431        | 0.534   | 0.394    | 0.446   | 0.656   |
| D_TM-NLS | 0.641        | 0.741   | 0.729    | 0.618   | 0.655   |
| D_TM_NS  | 0.504        | 0.575   | 0.481    | 0.402   | 0.897   |
| D_TM_VS  | 0.394        | 0.458   | 0.383    | 0.446   | 0.606   |
| D_VF_SCF | 0.406        | 0.458   | 0.390    | 0.409   | 0.462   |
| D_VF_SCS | 0.352        | 0.530   | 0.481    | 0.391   | 0.523   |
| D_VF_SLF | 0.428        | 0.488   | 0.452    | 0.519   | 0.371   |

|          | Correlations |          |         |         |          |
|----------|--------------|----------|---------|---------|----------|
|          | D_TM_MS      | D_TM-NLS | D_TM_NS | D_TM_VS | D_VF_SCF |
| D_TM_MS  | 1.000        |          |         |         |          |
| D_TM-NLS | 0.558        | 1.000    |         |         |          |
| D_TM_NS  | 0.656        | 0.649    | 1.000   |         |          |
| D_TM_VS  | 0.579        | 0.541    | 0.612   | 1.000   |          |
| D_VF_SCF | 0.405        | 0.498    | 0.472   | 0.327   | 1.000    |
| D_VF_SCS | 0.429        | 0.495    | 0.511   | 0.378   | 0.651    |
| D_VF_SLF | 0.309        | 0.440    | 0.307   | 0.208   | 0.644    |

|          | Correlations |          |
|----------|--------------|----------|
|          | D_VF_SCS     | D_VF_SLF |
| D_VF_SCS | 1.000        |          |
| D_VF_SLF | 0.520        | 1.000    |

## Correlations Among D-KEFS Variables

For Pearson sample

|          | Correlations |         |          |         |         |
|----------|--------------|---------|----------|---------|---------|
|          | D_CW_CN      | D_CW_IN | D_CW_ISW | D_CW_WR | D_TM_LS |
| D_CW_CN  | 1.000        |         |          |         |         |
| D_CW_IN  | 0.533        | 1.000   |          |         |         |
| D_CW_ISW | 0.466        | 0.603   | 1.000    |         |         |
| D_CW_WR  | 0.605        | 0.445   | 0.436    | 1.000   |         |
| D_TM_LS  | 0.337        | 0.305   | 0.284    | 0.265   | 1.000   |
| D_TM_MS  | 0.202        | 0.136   | 0.203    | 0.221   | 0.311   |
| D_TM-NLS | 0.347        | 0.382   | 0.401    | 0.266   | 0.550   |
| D_TM_NS  | 0.335        | 0.287   | 0.281    | 0.226   | 0.599   |
| D_TM_VS  | 0.319        | 0.186   | 0.197    | 0.297   | 0.347   |
| D_VF_SCF | 0.373        | 0.319   | 0.298    | 0.338   | 0.279   |
| D_VF_SCS | 0.274        | 0.275   | 0.238    | 0.233   | 0.206   |
| D_VF_SLF | 0.339        | 0.321   | 0.277    | 0.365   | 0.276   |

|          | Correlations |          |         |         |          |
|----------|--------------|----------|---------|---------|----------|
|          | D_TM_MS      | D_TM-NLS | D_TM_NS | D_TM_VS | D_VF_SCF |
| D_TM_MS  | 1.000        |          |         |         |          |
| D_TM-NLS | 0.244        | 1.000    |         |         |          |
| D_TM_NS  | 0.305        | 0.474    | 1.000   |         |          |
| D_TM_VS  | 0.257        | 0.252    | 0.372   | 1.000   |          |
| D_VF_SCF | 0.198        | 0.336    | 0.235   | 0.235   | 1.000    |
| D_VF_SCS | 0.102        | 0.296    | 0.197   | 0.148   | 0.435    |
| D_VF_SLF | 0.193        | 0.335    | 0.238   | 0.188   | 0.584    |

|          | Correlations |          |
|----------|--------------|----------|
|          | D_VF_SCS     | D_VF_SLF |
| D_VF_SCS | 1.000        |          |
| D_VF_SLF | 0.338        | 1.000    |

## Correlations Among WAIS-IV Variables

### For NNN sample

|         | WAIS_SI | WAIS_VC | WAIS_IN | WAIS_BD | WAIS_MR |
|---------|---------|---------|---------|---------|---------|
| WAIS_SI | 1.000   |         |         |         |         |
| WAIS_VC | 0.772   | 1.000   |         |         |         |
| WAIS_IN | 0.689   | 0.745   | 1.000   |         |         |
| WAIS_BD | 0.519   | 0.501   | 0.485   | 1.000   |         |
| WAIS_MR | 0.547   | 0.561   | 0.542   | 0.638   | 1.000   |
| WAIS_VP | 0.448   | 0.469   | 0.440   | 0.660   | 0.531   |
| WAIS_DS | 0.484   | 0.512   | 0.448   | 0.453   | 0.500   |
| WAIS_AR | 0.554   | 0.584   | 0.535   | 0.519   | 0.613   |
| WAIS_SS | 0.464   | 0.439   | 0.365   | 0.539   | 0.468   |
| WAIS_CD | 0.495   | 0.486   | 0.389   | 0.533   | 0.485   |

|         | Correlations<br>WAIS_VP | WAIS_DS | WAIS_AR | WAIS_SS | WAIS_CD |
|---------|-------------------------|---------|---------|---------|---------|
| WAIS_VP | 1.000                   |         |         |         |         |
| WAIS_DS | 0.378                   | 1.000   |         |         |         |
| WAIS_AR | 0.474                   | 0.624   | 1.000   |         |         |
| WAIS_SS | 0.501                   | 0.489   | 0.484   | 1.000   |         |
| WAIS_CD | 0.494                   | 0.522   | 0.529   | 0.727   | 1.000   |

### For Pearson sample

|         | WAIS_SI | WAIS_VC | WAIS_IN | WAIS_BD | WAIS_MR |
|---------|---------|---------|---------|---------|---------|
| WAIS_SI | 1.000   |         |         |         |         |
| WAIS_VC | 0.728   | 1.000   |         |         |         |
| WAIS_IN | 0.633   | 0.724   | 1.000   |         |         |
| WAIS_BD | 0.475   | 0.452   | 0.441   | 1.000   |         |
| WAIS_MR | 0.491   | 0.497   | 0.474   | 0.538   | 1.000   |
| WAIS_VP | 0.437   | 0.430   | 0.432   | 0.642   | 0.522   |
| WAIS_DS | 0.468   | 0.500   | 0.422   | 0.435   | 0.473   |
| WAIS_AR | 0.527   | 0.575   | 0.564   | 0.498   | 0.520   |
| WAIS_SS | 0.335   | 0.342   | 0.327   | 0.404   | 0.383   |
| WAIS_CD | 0.383   | 0.392   | 0.327   | 0.381   | 0.438   |

|         | Correlations<br>WAIS_VP | WAIS_DS | WAIS_AR | WAIS_SS | WAIS_CD |
|---------|-------------------------|---------|---------|---------|---------|
| WAIS_VP | 1.000                   |         |         |         |         |
| WAIS_DS | 0.398                   | 1.000   |         |         |         |
| WAIS_AR | 0.480                   | 0.598   | 1.000   |         |         |
| WAIS_SS | 0.369                   | 0.399   | 0.364   | 1.000   |         |
| WAIS_CD | 0.348                   | 0.439   | 0.429   | 0.643   | 1.000   |

## Correlations Among WMS-IV Variables

### For NNN sample

|          | Correlations |        |         |        |        |
|----------|--------------|--------|---------|--------|--------|
|          | WMS_VA       | WMS_VB | WMS_VBR | WMS_LA | WMS_LB |
| WMS_VA   | 1.000        |        |         |        |        |
| WMS_VB   | 0.686        | 1.000  |         |        |        |
| WMS_VBR  | 0.512        | 0.577  | 1.000   |        |        |
| WMS_LA   | 0.476        | 0.463  | 0.369   | 1.000  |        |
| WMS_LB   | 0.474        | 0.545  | 0.407   | 0.872  | 1.000  |
| WMS_LBR  | 0.303        | 0.411  | 0.460   | 0.543  | 0.590  |
| WMS_VPA  | 0.454        | 0.492  | 0.408   | 0.589  | 0.630  |
| WMS_VPB  | 0.480        | 0.563  | 0.457   | 0.546  | 0.605  |
| WMS_VPBR | 0.381        | 0.551  | 0.591   | 0.430  | 0.516  |

|         | Correlations |         |         |          |
|---------|--------------|---------|---------|----------|
|         | WMS_LBR      | WMS_VPA | WMS_VPB | WMS_VPBR |
| WMS_LBR | 1.000        |         |         |          |
| WMS_VPA | 0.360        | 1.000   |         |          |
| WMS_VPB | 0.388        | 0.849   | 1.000   |          |

### For Pearson sample

|          | Correlations |        |         |        |        |
|----------|--------------|--------|---------|--------|--------|
|          | WMS_VA       | WMS_VB | WMS_VBR | WMS_LA | WMS_LB |
| WMS_VA   | 1.000        |        |         |        |        |
| WMS_VB   | 0.608        | 1.000  |         |        |        |
| WMS_VBR  | 0.475        | 0.467  | 1.000   |        |        |
| WMS_LA   | 0.326        | 0.313  | 0.241   | 1.000  |        |
| WMS_LB   | 0.294        | 0.325  | 0.230   | 0.869  | 1.000  |
| WMS_LBR  | 0.286        | 0.285  | 0.227   | 0.672  | 0.659  |
| WMS_VPA  | 0.344        | 0.332  | 0.301   | 0.444  | 0.434  |
| WMS_VPB  | 0.355        | 0.347  | 0.346   | 0.400  | 0.419  |
| WMS_VPBR | 0.239        | 0.256  | 0.329   | 0.255  | 0.250  |

|          | Correlations |         |         |          |
|----------|--------------|---------|---------|----------|
|          | WMS_LBR      | WMS_VPA | WMS_VPB | WMS_VPBR |
| WMS_LBR  | 1.000        |         |         |          |
| WMS_VPA  | 0.394        | 1.000   |         |          |
| WMS_VPB  | 0.381        | 0.835   | 1.000   |          |
| WMS_VPBR | 0.296        | 0.562   | 0.646   | 1.000    |
