# Supplementary material
Source: PubMed Central journal article supplement (PMC9945479)
Supplement: NIHMS1868877-supplement-Supplemental_Material_6.pdf [file NIHMS1868877-supplement-Supplemental_Material_6.pdf]

**Supplemental Table 5**

*Characteristics of Patients Included Compared to Patients Not Included in Each Set of Tests*

|                                                     | WAIS-IV                                |                |                                            |             | Test<br>Statistic         | df   | nominal<br>p | Effect<br>Size |
|-----------------------------------------------------|----------------------------------------|----------------|--------------------------------------------|-------------|---------------------------|------|--------------|----------------|
|                                                     | Included - WAIS-IV<br>(N = 1,917; 38%) |                | Not Included - WAIS-IV<br>(N = 3,073; 62%) |             |                           |      |              |                |
|                                                     | N                                      | Mean<br>(SD)   | N                                          | Mean (SD)   |                           |      |              |                |
| Age<br>(1)                                          | 1910                                   | 52.9<br>(18.3) | 3073                                       | 59.4 (18.2) | t=12.2                    | 4981 | 0.001        | d=0.355        |
| Education<br>(2)                                    | 252                                    | 14.6 (2.5)     | 433                                        | 15.22 (2.9) | t=2.4                     | 471  | 0.019        | d=0.193        |
| Sex                                                 | N                                      | Percent        | N                                          | Percent     | X <sup>2</sup> =0.39      | 3    | 0.943        | phi=.009       |
| Male                                                | 907                                    | 38.2%          | 1469                                       | 61.8%       |                           |      |              |                |
| Female                                              | 1000                                   | 38.2%          | 1615                                       | 61.8%       |                           |      |              |                |
| Intersex                                            | 1                                      | 0.1%           | 2                                          | 0.1%        |                           |      |              |                |
| None of<br>these<br>describe me                     | 3                                      | 3.0%           | 6                                          | 0.1%        |                           |      |              |                |
| Race                                                | N                                      | Percent        | N                                          | Percent     | X <sup>2</sup> =17.0<br>4 | 7    | 0.017        | phi=.058       |
| White                                               | 1496                                   | 37.3%          | 2518                                       | 62.7%       |                           |      |              |                |
| Black                                               | 264                                    | 44.2%          | 333                                        | 55.8%       |                           |      |              |                |
| Asian                                               | 35                                     | 34.0%          | 68                                         | 66.0%       |                           |      |              |                |
| Native<br>Hawaiian/<br>Other<br>Pacific<br>Islander | 2                                      | 66.7%          | 1                                          | 33.3%       |                           |      |              |                |
| Native<br>American/<br>Alaskan<br>Native            | 8                                      | 50.0%          | 8                                          | 50.0%       |                           |      |              |                |
| Other                                               | 31                                     | 32.6%          | 1                                          | 67.4%       |                           |      |              |                |
| Unknown                                             | 62                                     | 42.8%          | 83                                         | 57.2%       |                           |      |              |                |
| Prefer Not<br>to Answer/<br>Declined to<br>Specify  | 13                                     | 48.1%          | 52                                         | 0.5%        |                           |      |              |                |
| Ethnicity                                           | N                                      | Percent        | N                                          | Percent     | X <sup>2</sup> =21.8<br>8 | 2    | 0.001        | 0.066          |

**Supplemental Table 5**

*Characteristics of Patients Included Compared to Patients Not Included in Each Set of Tests*

|                        |      |       |      |       |
|------------------------|------|-------|------|-------|
| Hispanic or Latino     | 44   | 25.0% | 132  | 75.0% |
| Not Hispanic or Latino | 1780 | 38.3% | 1868 | 61.7% |
| Unknown/ Missing       | 86   | 38.2% | 89   | 61.8% |

Notes. (1) Age was recoded as 90 for those with age > 89. (2) Education was coded using an adaptation of the PhenX Toolkit; a score of 14 indicates an Associates Degree and 15 indicates completion of 3 years but not graduating from college (full code available at [www.nnn.ucla.edu](http://www.nnn.ucla.edu)).

|                                        | Included - WMS-IV |            | Not Included - WMS-IV |            | Test Statistic | df   | nominal p | Effect Size |
|----------------------------------------|-------------------|------------|-----------------------|------------|----------------|------|-----------|-------------|
|                                        | N                 | Mean (SD)  | N                     | Mean (SD)  |                |      |           |             |
| Age(1)                                 | 1634              | 53.9(18.2) | 3349                  | 58.4(18.4) | t=8.3          | 4981 | 0.001     | d=0.252     |
| Education(2)                           | 365               | 14.7(2.5)  | 320                   | 15.0(2.8)  | t=1.8          | 683  | 0.07      | d=0.14      |
| Sex                                    | N                 | Percent    | N                     | Percent    | X2 = 0.29      | 3    | 0.961     | phi=.008    |
| Male                                   | 768               | 32.3%      | 1608                  | 67.7%      |                |      |           |             |
| Female                                 | 864               | 33.0%      | 1751                  | 67.0%      |                |      |           |             |
| Intersex                               | 1                 | 33.3%      | 2                     | 66.7%      |                |      |           |             |
| None of these describe me              | 2                 | 33.3%      | 4                     | 66.7%      |                |      |           |             |
| Race                                   | N                 | Percent    | N                     | Percent    |                |      |           |             |
| White                                  | 1304              | 32.5%      | 2710                  | 67.5%      |                |      |           |             |
| Black                                  | 236               | 39.5%      | 361                   | 60.5%      |                |      |           |             |
| Asian                                  | 28                | 27.2%      | 75                    | 72.8%      |                |      |           |             |
| Native Hawaiian/Other Pacific Islander | 2                 | 66.7%      | 1                     | 33.3%      |                |      |           |             |
| Native American/Alaskan Native         | 5                 | 31.3%      | 11                    | 68.8%      |                |      |           |             |
| Other                                  | 22                | 23.2%      | 73                    | 76.8%      |                |      |           |             |

**Supplemental Table 5**

*Characteristics of Patients Included Compared to Patients Not Included in Each Set of Tests*

|                                          |                                      |            |                                          |            |                       |      |           |             |
|------------------------------------------|--------------------------------------|------------|------------------------------------------|------------|-----------------------|------|-----------|-------------|
| Unknown                                  | 29                                   | 20.0%      | 116                                      | 80.0%      |                       |      |           |             |
| Prefer Not to Answer/Declined to Specify | 9                                    | 33.3%      | 18                                       | 66.7%      |                       |      |           |             |
| Ethnicity                                | N                                    | Percent    | N                                        | Percent    | X <sup>2</sup> =18.88 | 2    | 0.001     | phi=0.061   |
| Hispanic or Latino                       | 35                                   | 19.9%      | 141                                      | 80.1%      |                       |      |           |             |
| Not Hispanic or Latino                   | 155                                  | 33.5%      | 3093                                     | 66.5%      |                       |      |           |             |
| Unknown/Missing                          | 44                                   | 25.1%      | 131                                      | 74.9%      |                       |      |           |             |
| CVLT3                                    |                                      |            |                                          |            |                       |      |           |             |
|                                          | Included - CVLT3<br>(N = 1,917; 38%) |            | Not Included - CVLT3<br>(N = 3,073; 62%) |            | Test Statistic        | df   | nominal p | Effect Size |
|                                          | N                                    | Mean (SD)  | N                                        | Mean (SD)  |                       |      |           |             |
| Age(1)                                   | 4326                                 | 58.9(18.1) | 657                                      | 43.7(15.2) | t=20.47               | 4981 | 0.001     | d=0.857     |
| Education(2)                             | 209                                  | 14.8(2.5)  | 476                                      | 14.9(2.7)  | t=0.513               | 683  | 0.594     | d=0.043     |
| Sex                                      |                                      |            |                                          |            | X <sup>2</sup> =1.42  | 3    | 0.702     | phi=.017    |
| Male                                     | 301                                  | 12.7%      | 2075                                     | 87.3%      |                       |      |           |             |
| Female                                   | 366                                  | 13.6%      | 2260                                     | 86.4%      |                       |      |           |             |
| Intersex                                 | 0                                    | 0.0%       | 3                                        | 100.0%     |                       |      |           |             |
| None of these describe me                | 1                                    | 16.7%      | 5                                        | 83.3%      |                       |      |           |             |
| Race                                     | N                                    | Percent    | N                                        | Percent    | X <sup>2</sup> =91.58 | 7    | 0.001     | phi=0.135   |
| White                                    | 505                                  | 12.6%      | 3509                                     | 87.4%      |                       |      |           |             |
| Black                                    | 46                                   | 7.7%       | 551                                      | 92.3%      |                       |      |           |             |
| Asian                                    | 25                                   | 24.3%      | 78                                       | 75.7%      |                       |      |           |             |



**Supplemental Table 5***Characteristics of Patients Included Compared to Patients Not Included in Each Set of Tests*

|                                          | N   | Percent | N    | Percent |                        |   |       |           |
|------------------------------------------|-----|---------|------|---------|------------------------|---|-------|-----------|
| None of these describe me                | 0   | 0.0%    | 6    | 100.0%  |                        |   |       |           |
| Race                                     | N   | Percent | N    | Percent | X <sup>2</sup> =169.29 | 7 | 0.001 | phi=0.184 |
| White                                    | 385 | 9.6%    | 3629 | 90.4%   |                        |   |       |           |
| Black                                    | 44  | 7.4%    | 553  | 92.6%   |                        |   |       |           |
| Asian                                    | 20  | 19.4%   | 83   | 80.6%   |                        |   |       |           |
| Native Hawaiian/Other Pacific Islander   | 0   | 0.0%    | 3    | 100.0%  |                        |   |       |           |
| Native American/Alaskan Native           | 3   | 18.8%   | 13   | 81.3%   |                        |   |       |           |
| Other                                    | 16  | 16.8%   | 79   | 83.2%   |                        |   |       |           |
| Unknown                                  | 57  | 39.3%   | 88   | 60.7%   |                        |   |       |           |
| Prefer Not to Answer/Declined to Specify | 10  | 37.0%   | 17   | 63.0%   |                        |   |       |           |
| Ethnicity                                | N   | Percent | N    | Percent | X <sup>2</sup> =189.84 | 2 | 0.001 | phi=0.195 |
| Hispanic or Latino                       | 17  | 9.7%    | 159  | 90.3%   |                        |   |       |           |
| Not Hispanic or Latino                   | 443 | 9.5%    | 4205 | 90.5%   |                        |   |       |           |
| Unknown/Missing                          | 74  | 13.9%   | 101  | 57.7%   |                        |   |       |           |

Notes. (1) Age was recoded as 90 for those with age > 89. (2) Education was coded using an adaptation of the PhenX Toolkit; a score of 14 indicates an Associate's Degree and 15 indicates completion of 3 years but not graduating from college (full code available at [www.nnn.ucla.edu](http://www.nnn.ucla.edu)).
