# Supplementary material
Source: PubMed Central journal article supplement (PMC9945479)
Supplement: NIHMS1868877-supplement-Supplemental_Material_7.pdf [file NIHMS1868877-supplement-Supplemental_Material_7.pdf]

**Supplemental Table 5**

*Confirmatory Factor Analysis Models and Fit Indices in the NNN Sample*

WAIS models (N = 1911) [models numbered based on WAIS technical manual]

10 subtest scores: [SI, VC, IN], [BD, MR, VP], [DS, AR], [SS, CD]

|                                                   | $\chi^2$ | df | CFI  | TLI  | RMSEA [CI]        | SRMR | BIC     |
|---------------------------------------------------|----------|----|------|------|-------------------|------|---------|
| 1. One-factor                                     | 691.63   | 35 | .876 | .840 | .099 [.093, .106] | .069 | 52513.5 |
| 2. One second-order and two first-order factors   | 503.55   | 34 | .911 | .883 | .085 [.079, .092] | .060 | 52333.0 |
| 3. One second-order and three first-order factors | 227.60   | 32 | .963 | .948 | .057 [.050, .064] | .045 | 52072.2 |
| 4. One second-order and four first-order factors  | 86.24    | 31 | .990 | .985 | .031 [.023, .038] | .034 | 51938.4 |
| 6. Four correlated first-order factors            | 71.84    | 29 | .992 | .987 | .028 [.020, .036] | .030 | 51939.1 |

| <u>Wechsler Terms</u> | <u>CHC theory terms</u> | <u>Indicators</u> |             |
|-----------------------|-------------------------|-------------------|-------------|
| Verbal Comprehension  | (Gc)                    | SI, VC, IN        | Verbal      |
| Perceptual Reasoning  | (Gv / Gf)               | BD, MR, VP        | Performance |
| Working Memory        | (Gsm)                   | DS, AR            | Verbal      |
| Processing Speed      | (Gs)                    | SS, CD            | Performance |

Model 1: General intelligence

Model 2: General intelligence + (Verbal and Performance)

Model 3: General intelligence + (Verbal Comprehension, Perceptual Reasoning, and Working Memory/Proc. Speed??)

Model 4: General intelligence + (Verbal Comp, Percep. Reasoning, Working Memory, Processing Speed)

Model 6: Four correlated first-order factors (cf. Model 4)

Red ink: Optimal model with higher-order g factor

Blue ink: Optimal model with correlated first-order factors (without g factor)

## Supplemental Table 5

### Confirmatory Factor Analysis Models and Fit Indices in the NNN Sample

CVLT models (N = 657) [models based on Donders, 2008]

13 manifest variables [list A trial 1, list B, recall middle], [list A trial 5, semantic clust., recall consis.], [short-delay free, short-delay cued, long-delay free, long-delay cued, long-delay fc recog hits], [intrusions, total recog discrimin d']

|                                       | $\chi^2$ | df | CFI  | TLI  | RMSEA [CI]        | SRMR | BIC     |
|---------------------------------------|----------|----|------|------|-------------------|------|---------|
| 1. One-factor                         | 654.53   | 65 | .915 | .898 | .117 [.109, .126] | .051 | 37615.9 |
| 2. Two-factor                         | 577.27   | 64 | .926 | .909 | .110 [.102, .119] | .045 | 37545.2 |
| 3. Three-factor                       | 431.54   | 60 | .946 | .930 | .097 [.082, .099] | .042 | 37425.4 |
| 4. Four-factor                        | 299.84   | 56 | .965 | .951 | .081 [.072, .091] | .037 | 37319.7 |
| 5. Model 4, but with a general factor | 303.08   | 58 | .965 | .952 | .080 [.071, .089] | .037 | 37309.9 |

Model 1: General Memory factor

Model 2: Accurate Memory (11 indicators), Inaccurate Memory (2 indicators)

Model 3: Immediate Memory (6 indicators), Delayed Memory (5 indicators), Inaccurate Memory (2 indicators)

Model 4: Attention Span (3 indicators), Learning Efficiency (3 indicators), Delayed Memory (5), Inaccurate Memory (2)

ML function minimum,  $F_{ml}$ , multiplied by (N – 1) yields the chi-square value. So, for Donders (2008), we get the following:

Young ( $n = 357$ ) chi-square of 140.02 implies  $F_{ml} = 140.02 / 356 = 0.3933$

Middle ( $n = 331$ ) chi-square of 132.35 implies  $F_{ml} = 132.35 / 330 = 0.4011$

Old ( $n = 388$ ) chi-square of 187.45 implies  $F_{ml} = 187.45 / 387 = 0.4844$

In our sample, with a rather larger sample size, we get

NNN ( $n = 657$ ) chi-square of 299.84 implies  $F_{ml} = 299.84 / 656 = 0.4571$

so our CVLT 4-factor model fits about as well as those in Donders (2008).

Red ink: Optimal model with higher-order g factor

Blue ink: Optimal model with correlated first-order factors (without g factor)

**Supplemental Table 5**

*Confirmatory Factor Analysis Models and Fit Indices in the NNN Sample*

WMS models (N = 1635)

9 manifest variables

|                                                                             | $\chi^2$     | df        | CFI         | TLI         | RMSEA [CI]               | SRMR        | BIC            |
|-----------------------------------------------------------------------------|--------------|-----------|-------------|-------------|--------------------------|-------------|----------------|
| 1. One-factor                                                               | 1178.45      | 27        | .798        | .718        | .162 [.154, .169]        | .147        | 43318.2        |
| 2. One second-order, two first-order factors                                | 528.19       | 26        | .908        | .872        | .109 [.101, .117]        | .140        | 42675.3        |
| 3. One 2 <sup>nd</sup> -order, three 1 <sup>st</sup> -order w 2 uniq covs   | 243.71       | 24        | .960        | .940        | .075 [.066, .083]        | .117        | 42405.6        |
| <b>4. One 2<sup>nd</sup> order, 3 1<sup>st</sup>-order, plus correlated</b> |              |           |             |             |                          |             |                |
| <b>Recognition factor, w 2 uniq cov</b>                                     | <b>51.64</b> | <b>18</b> | <b>.994</b> | <b>.988</b> | <b>.034 [.023, .045]</b> | <b>.028</b> | <b>42258.0</b> |
| <b>5. Four 1<sup>st</sup> order correlated factors w 2 uniq cov</b>         | <b>46.55</b> | <b>16</b> | <b>.994</b> | <b>.987</b> | <b>.034 [.023, .046]</b> | <b>.027</b> | <b>42267.7</b> |

Model 1: General Memory

Model 2: General Memory + (Visual and Auditory first-order factors)

Model 3: General Memory + (Visual, Logical Memory, & Paired Associates first-order factors), plus 2 covariances between unique factors

Model 4: General Memory + (Visual, Logical Memory, & Paired Associates first-order factors), plus 2 covariances between unique factors, but adding Recognition factor correlated with the General Memory factor

Model 5: Visual, Logical Memory, Paired Associates, and Recognition correlated first-order factors, plus 2 covariances between unique factors

Red ink: Optimal model with higher-order g factor

Blue ink: Optimal model with correlated first-order factors (without g factor)

## Supplemental Table 5

### Confirmatory Factor Analysis Models and Fit Indices in the NNN Sample

DKEFS models (N = 535)

12 manifest variables: [cw\_cn, cw\_in, cw\_isw, cw\_wr],[tm\_ls, tm\_ms, tm\_nls, tm\_ns, tm\_vs],[vf\_scf, vf\_scs, vf\_slf]

|                                                  | $\chi^2$ | df | CFI  | TLI  | RMSEA [CI]        | SRMR | BIC      |
|--------------------------------------------------|----------|----|------|------|-------------------|------|----------|
| 1. One-factor                                    | 340.91   | 54 | .829 | .791 | .100 [.090, .110] | .100 | 15454.06 |
| 2. General factor plus three first-order factors | 107.81   | 50 | .965 | .954 | .046 [.034, .059] | .059 | 15246.10 |
| 3. General factor plus four first-order factors  | 54.37    | 45 | .994 | .992 | .020 [.000, .037] | .041 | 15224.07 |
| 4. Three correlated first-order factors          | 107.81   | 50 | .965 | .954 | .046 [.034, .059] | .059 | 15246.10 |
| 5. Four correlated first-order factors           | 53.49    | 43 | .994 | .990 | .021 [.000, .038] | .040 | 15235.75 |

Model 1: General Exec Functioning (?)

Model 2: General Exec. Functioning + (Color Word Interference, Trail Making, Fluency)

Model 3: General Exec. Functioning + (Color Word Interference, Trail Making, Fluency, Inhibition/Switching)

Model 4: Color Word Interference, Trail Making, Fluency

Model 5: Color Word Interference, Trail Making, Fluency, Inhibition/Switching (same as Model 3, except no General factor)

Red ink: Optimal model with higher-order g factor

Blue ink: Optimal model with correlated first-order factors (without g factor)
