# Supplementary material
Source: PubMed Central journal article supplement (PMC9945479)
Supplement: NIHMS1868877-supplement-Supplemental_Material_9.pdf [file NIHMS1868877-supplement-Supplemental_Material_9.pdf]

## **FACTORIAL INVARIANCE: MODEL FITS FOR MODELS USING NNN AND PEARSON DATA**

When exploring factorial invariance, common practice is to begin with relatively a unconstrained model and then add across-groups constraints in a systematic fashion to determine whether the additional constraints harm the fit of the model to data. This approach has been discussed in several publications, including Widaman and Reise (1997) and Widaman and Olivera-Aguilar (2022). The following approach has been taken for models, with model numbering:

### **Models with a second-order general factor**

In models with a second-order general factor, correlations among factors are typically fixed at zero to identify the model. Thus, one can test invariance of factor variances, but not invariance of factor covariances (which are fixed at zero).

1. Configural invariance = same pattern of fixed and free parameters across groups
2. Weak factorial invariance = invokes invariance of factor loadings
3. Strong factorial invariance = adds to Model 2 invariance of intercepts
4. Strict factorial invariance = adds to Model 3 invariance of unique factor variances
5. Test of factor variances = adds to Model 4 invariance of latent variable variances
6. Test of factor means = adds – typically to Model 5, sometimes to Model 4 – invariance of latent variable means

### **Models with a second-order general factor**

In models without a second-order general factor (so consisting of simply a set of correlated first-order factors), it is possible to test invariance constraints separately on latent variable variances and latent variable covariances. Because of this, a slight alteration in number was used:

1. Configural invariance = same pattern of fixed and free parameters across groups
2. Weak factorial invariance = invokes invariance of factor loadings
3. Strong factorial invariance = adds to Model 2 invariance of intercepts
4. Strict factorial invariance = adds to Model 3 invariance of unique factor variances
5. Test of factor variances = adds to Model 4 invariance of latent variable variances
6. Test of factor covariances = adds to Model 4 invariance of latent variable covariances
7. Test of factor means = adds – typically to Model 5 or 6, sometimes to Model 4 – invariance of latent variable means

In models designated by simple numerals (i.e., with no accompanying letter), full invariance of all relevant parameters is assumed. If an English letter is appended to the model number, one or more parameter restrictions have been relaxed to improve model fit, leading to partial factorial invariance of the set of parameters. For example, suppose the following models are listed:

1. Configural invariance
2. Weak factorial invariance – all factor loadings are invariant
3. Strong factorial invariance – all intercepts are invariant
  - 3a. Partial strong factorial invariance – the ‘a’ indicates relaxing constraints on one or more intercepts
  - 4a. Partial strict factorial invariance – the ‘a’ indicates that the relaxed constraints on one or more intercepts were retained, but all unique variances forced to invariance
  - 4b. Partial strict factorial invariance – the ‘b’ indicates that one or more unique variance constraints have been relaxed, in addition to the relaxing of constraints on intercepts in Model 3a
  - 5b. Test of factor variances – retaining the relaxed constraints on intercepts (Model 3a) and on unique variances (Model 4b), but adding to Model 4b invariance of factor variances
  - 6b. Test of factor means – retaining the relaxed constraints on intercepts (Model 3a) and on unique variances (Model 4b), but adding – typically to Model 5b – invariance of factor means

**WAIS-IV models (NNN data, N = 1911; Pearson, N = 2200)**

10 subtest scores: [SI, VC, IN], [BD, MR, VP], [DS, AR], [SS, CD]

All models had 4 first-order factors, based on best-fitting model for NNN and Pearson data separately, specifically:

|                              |            |
|------------------------------|------------|
| Verbal Comprehension (Gc)    | SI, VC, IN |
| Perceptual Reasoning (Gf/Gv) | BD, MR, VP |
| Working Memory (Gsm)         | DS, AR     |
| Processing Speed (Gs)        | SS, CD     |

|                                                             | $\chi^2$      | df        | CFI         | TLI         | RMSEA [CI]               | SRMR        | BIC              |
|-------------------------------------------------------------|---------------|-----------|-------------|-------------|--------------------------|-------------|------------------|
| <b>Models WITH a g factor and 4 first-order factors</b>     |               |           |             |             |                          |             |                  |
| 1. Configural invariance                                    | 372.72        | 60        | .981        | .972        | .050 [.046, .055]        | .030        | 152531.38        |
| 2. Weak factorial invariance                                | 428.97        | 70        | .978        | .972        | .050 [.045, .055]        | .045        | 152504.41        |
| 3. Strong factorial invariance                              | 658.63        | 76        | .965        | .958        | .061 [.057, .065]        | .049        | 152684.14        |
| 3a. Partial strong factorial invariance, free 2 intercepts* | 486.87        | 74        | .975        | .970        | .052 [.048, .057]        | .045        | 152529.02        |
| 4a. Partial strict factorial invariance                     | 500.30        | 84        | .975        | .973        | .049 [.045, .050]        | .045        | 152459.23        |
| <b>5a. Model 4a, plus invariance of LV variances</b>        | <b>518.66</b> | <b>89</b> | <b>.974</b> | <b>.974</b> | <b>.048 [.044, .053]</b> | <b>.061</b> | <b>152435.99</b> |
| 6a. Model 5a, plus invariance of LV means                   | 1015.89       | 93        | .944        | .946        | .069 [.066, .073]        | .096        | 152899.93        |
| <b>Models WITHOUT a g factor, just 4 correlated factors</b> |               |           |             |             |                          |             |                  |
| 11. Configural invariance                                   | 354.89        | 58        | .982        | .972        | .050 [.045, .055]        | .028        | 152530.19        |
| 12. Weak factorial invariance                               | 384.39        | 64        | .981        | .973        | .049 [.045, .054]        | .037        | 152509.76        |
| 13. Strong factorial invariance                             | 604.95        | 70        | .968        | .958        | .061 [.057, .065]        | .041        | 152680.39        |
| 13a. Strong factorial invariance, free 2 intercepts*        | 434.40        | 68        | .978        | .971        | .051 [.047, .056]        | .035        | 152526.48        |
| 14a. Strict factorial invariance                            | 448.39        | 78        | .978        | .974        | .048 [.044, .052]        | .036        | 152457.26        |

|                                                          |               |           |             |             |                          |             |                  |
|----------------------------------------------------------|---------------|-----------|-------------|-------------|--------------------------|-------------|------------------|
| 15a. Model 14a, plus invariance of LV variances          | 469.59        | 82        | .976        | .974        | .048 [.044, .052]        | .054        | 152445.17        |
| <b>16a. Model 15a, plus invariance of LV covariances</b> | <b>497.81</b> | <b>88</b> | <b>.975</b> | <b>.975</b> | <b>.048 [.044, .052]</b> | <b>.059</b> | <b>152423.46</b> |
| 17a. Model 16a, plus invariance of LV means              | 978.60        | 92        | .946        | .947        | .068 [.065, .072]        | .095        | 152870.96        |

**Red ink: Optimal higher-order model (with g factor)**

**Blue ink: Optimal correlated factor model (without g factor)**

\* The two intercepts freed were for IN and BD manifest variables in NNN sample

Factor means in NNN sample (means fixed to 0.00 in Pearson sample, as reference group)

| Model 5a: WITH g factor | Mean (SE)     | Corrected means (adjusting for g) |
|-------------------------|---------------|-----------------------------------|
| g                       | -0.326 (.036) |                                   |
| Verbal comprehension    | 0.353 (.023)  | $0.353 - 0.326 = 0.027 (.041)$    |
| Perceptual reasoning    | 0.208 (.026)  | $0.208 - 0.326 = -0.118 (.044)$   |
| Working memory          | -0.272 (.025) | $-0.272 - 0.326 = -0.598 (.043)$  |
| Processing speed        | -0.289 (.027) | $-0.289 - 0.326 = -0.615 (.046)$  |

Model 15b: WITHOUT g factor

|                      |               |
|----------------------|---------------|
| Verbal comprehension | 0.088 (.035)  |
| Perceptual reasoning | -0.087 (.041) |
| Working memory       | -0.545 (.040) |
| Processing speed     | -0.533 (.039) |

**CVLT3** models (NNN data, N = 657; Pearson data, N = 698) [models based on Donders, 2008]

13 manifest variables [list A trial 1, list B, recall middle], [list A trial 5, semantic clust. recall consistency], [short-delay free, short-delay cued, long-delay free, long-delay cued, long-delay forced choice recog hits], [intrusions, total recog discrimin d']

|                                                             | $\chi^2$      | df         | CFI         | TLI         | RMSEA [CI]               | SRMR        | BIC             |
|-------------------------------------------------------------|---------------|------------|-------------|-------------|--------------------------|-------------|-----------------|
| <b>Models WITH a g factor and 4 first-order factors</b>     |               |            |             |             |                          |             |                 |
| 1. Configural invariance                                    | 547.30        | 116        | .966        | .954        | .074 [.068, .080]        | .036        | 77584.65        |
| 2. Weak factorial invariance                                | 560.58        | 128        | .966        | .959        | .071 [.065, .077]        | .040        | 77511.39        |
| 3. Strong factorial invariance                              | 642.08        | 137        | .960        | .955        | .074 [.068, .080]        | .041        | 77527.98        |
| 4. Strict factorial invariance                              | 681.85        | 153        | .958        | .958        | .071 [.066, .077]        | .050        | 77452.37        |
| <b>5. Model 4, plus invariance of LV variances</b>          | <b>700.84</b> | <b>158</b> | <b>.957</b> | <b>.958</b> | <b>.071 [.066, .077]</b> | <b>.083</b> | <b>77435.30</b> |
| 6. Model 5, plus invariance of LV means                     | 773.31        | 162        | .952        | .954        | .075 [.069, .080]        | .104        | 77478.92        |
| <b>Models WITHOUT a g factor, just 4 correlated factors</b> |               |            |             |             |                          |             |                 |
| 11. Configural invariance                                   | 533.87        | 112        | .967        | .954        | .075 [.068, .081]        | .035        | 77600.06        |
| 12. Weak factorial invariance                               | 544.98        | 121        | .967        | .957        | .072 [.066, .078]        | .039        | 77546.27        |
| 13. Strong factorial invariance                             | 626.55        | 130        | .961        | .953        | .075 [.069, .081]        | .040        | 77562.93        |
| 14. Strict factorial invariance                             | 666.70        | 146        | .959        | .956        | .073 [.067, .078]        | .049        | 77487.69        |
| 15. Model 14, plus invariance of LV variances               | 686.12        | 150        | .958        | .956        | .073 [.067, .078]        | .083        | 77478.27        |
| <b>16. Model 15, plus invariance of LV covariances</b>      | <b>687.64</b> | <b>156</b> | <b>.958</b> | <b>.958</b> | <b>.071 [.066, .076]</b> | <b>.083</b> | <b>77436.52</b> |
| 17. Model 16, plus invariance of LV means                   | 761.56        | 160        | .953        | .954        | .074 [.069, .080]        | .104        | 77481.60        |

**Red ink: Optimal higher-order model (with g factor)**  
**Blue ink: Optimal correlated factor model (without g factor)**

Factor means in NNN sample (means fixed to 0.00 in Pearson sample, as reference group)

| Model 5: WITH g factor | Mean (SE)     | Corrected means (adjusting for g) |
|------------------------|---------------|-----------------------------------|
| g                      | -0.337 (.059) |                                   |
| Attention Span         | -0.246 (.043) | $-0.246 - 0.337 = -0.583 (.078)$  |
| Learning Efficiency    | 0.156 (.028)  | $0.156 - 0.337 = -0.181 (.061)$   |
| Delayed Memory         | 0.137 (.025)  | $0.137 - 0.337 = -0.200 (.057)$   |
| Inaccurate Memory      | -0.047 (.039) | $-0.047 - 0.337 = -0.384 (.075)$  |

Model 16: WITHOUT g factor

|                     |               |
|---------------------|---------------|
| Attention Span      | -0.531 (.071) |
| Learning Efficiency | -0.155 (.057) |
| Delayed Memory      | -0.191 (.056) |
| Inaccurate Memory   | -0.285 (.060) |

**WMS-IV** models (NNN data,  $N = 1635$ ; Pearson data,  $N = 898$ ), based on 9 manifest variables

All models identified Recognition indicators as censored above, so used WLSMV estimator

|                                                             | $\chi^2$      | df        | CFI         | TLI         | RMSEA [CI]               | SRMR        | BIC |
|-------------------------------------------------------------|---------------|-----------|-------------|-------------|--------------------------|-------------|-----|
| <b>Models WITH a g factor and 4 first-order factors</b>     |               |           |             |             |                          |             |     |
| 31. Configural invariance                                   | 76.41         | 36        | .990        | .981        | .030 [.020, .039]        | .021        |     |
| 32. Weak factorial invariance                               | 100.65        | 46        | .987        | .979        | .031 [.022, .039]        | .034        |     |
| 33. Strong factorial invariance                             | 110.81        | 51        | .986        | .980        | .030 [.023, .038]        | .035        |     |
| <b>34. Strict factorial invariance</b>                      | <b>134.39</b> | <b>62</b> | <b>.983</b> | <b>.980</b> | <b>.030 [.023, .037]</b> | <b>.053</b> |     |
| 35. Model 34, plus invariance of LV variances               | 530.81        | 68        | .889        | .882        | .073 [.068, .079]        | .249        |     |
| 36. Model 35, plus invariance of LV means                   | 1333.47       | 72        | .697        | .697        | .118 [.112, .123]        | .386        |     |
| <b>Models WITHOUT a g factor, just 4 correlated factors</b> |               |           |             |             |                          |             |     |
| 21. Configural invariance                                   | 51.57         | 32        | .995        | .989        | .022 [.010, .033]        | .017        |     |
| 22. Weak factorial invariance                               | 86.21         | 40        | .989        | .980        | .030 [.021, .039]        | .027        |     |
| 23. Strong factorial invariance                             | 111.34        | 45        | .984        | .975        | .034 [.026, .042]        | .033        |     |
| <b>24. Strict factorial invariance</b>                      | <b>131.26</b> | <b>56</b> | <b>.982</b> | <b>.977</b> | <b>.033 [.025, .040]</b> | <b>.048</b> |     |
| 25. Model 24, plus invariance of LV variances               | 338.47        | 60        | .933        | .920        | .061 [.054, .067]        | .148        |     |
| 26. Model 25, plus invariance of LV covariances             | 521.83        | 66        | .891        | .881        | .074 [.068, .080]        | .249        |     |
| 27. Model 26, plus invariance of LV means                   | 1314.19       | 70        | .702        | .693        | .118 [.113, .124]        | .386        |     |

**Red ink:** Optimal higher-order model (with g factor)

**Blue ink:** Optimal correlated factor model (without g factor)

**Models specifying Recognition indicators as Censored Above, so WLSMV is used as estimator**

Factor means in NNN sample (means fixed to 0.00 in Pearson sample, as reference group, except for Recognition/Familiarity factor, which had mean fixed at 0.00 in NNN sample and then estimated in Pearson sample)

| Model 34: WITH g factor                      | Mean (SE)     | Corrected mean (adjusting for g) |
|----------------------------------------------|---------------|----------------------------------|
| g                                            | -0.986 (.075) |                                  |
| Visual                                       | -0.091 (.067) | $-0.091 - 0.986 = -1.078$ (.096) |
| Logical Memory                               | 0.089 (.063)  | $0.089 - 0.986 = -0.898$ (.085)  |
| Paired Associates                            | 0.003 (.085)  | $0.003 - 0.986 = -0.984$ (.126)  |
| Recognition/Familiarity                      | 0.000 (-----) |                                  |
| Recognition/Familiarity in<br>Pearson sample | 1.026 (.061)  |                                  |

| Model 24: WITHOUT g factor                   | Mean (SE)     |
|----------------------------------------------|---------------|
| Visual                                       | -0.736 (.061) |
| Logical Memory                               | -0.576 (.048) |
| Paired Associates                            | -0.686 (.081) |
| Recognition/Familiarity                      | 0.000 (-----) |
| Recognition/Familiarity in<br>Pearson sample | 1.014 (.063)  |



**DKEFS models (NNN data, N = 535, Pearson data, N = 890)**

12 manifest variables: [cw\_cn, cw\_in, cw\_isw, cw\_wr],[tm\_ls, tm\_ms, tm\_nls, tm\_ns, tm\_vs],[vf\_scf, vf\_scs, vf\_slf]

|                                                             | $\chi^2$      | df         | CFI         | TLI         | RMSEA [CI]               | SRMR        | BIC             |
|-------------------------------------------------------------|---------------|------------|-------------|-------------|--------------------------|-------------|-----------------|
| <b>Models WITH a g factor and 4 first-order factors</b>     |               |            |             |             |                          |             |                 |
| 1. Configural invariance                                    | 179.47        | 90         | .982        | .974        | .037 [.029, .045]        | .033        | 66231.63        |
| 2. Weak factorial invariance                                | 211.80        | 105        | .979        | .974        | .038 [.030, .045]        | .053        | 66155.04        |
| 3. Strong factorial invariance                              | 278.06        | 113        | .968        | .962        | .045 [.039, .052]        | .062        | 66163.20        |
| 3a. Partial Strong (freed 1 intercept)*                     | 242.94        | 112        | .974        | .970        | .041 [.034, .047]        | .055        | 66135.34        |
| 4a. Partial Strict factorial invariance                     | 282.69        | 124        | .969        | .967        | .042 [.036, .049]        | .080        | 66087.95        |
| <b>4b. 4a plus freed one unique variance**</b>              | <b>258.01</b> | <b>123</b> | <b>.973</b> | <b>.972</b> | <b>.039 [.033, .046]</b> | <b>.056</b> | <b>66070.53</b> |
| 5b. Model 4b, plus invariance of LV variances               | 357.52        | 128        | .955        | .955        | .050 [.044, .056]        | .166        | 66133.74        |
| 6b. Model 5b, plus invariance of LV means                   | 452.05        | 132        | .937        | .937        | .058 [.052, .064]        | .206        | 66199.22        |
| <b>Models WITHOUT a g factor, just 4 correlated factors</b> |               |            |             |             |                          |             |                 |
| 11. Configural invariance                                   | 178.40        | 86         | .982        | .972        | .039 [.031, .047]        | .033        | 66259.61        |
| 12. Weak factorial invariance                               | 201.80        | 98         | .980        | .973        | .039 [.031, .046]        | .043        | 66195.86        |
| 13. Strong factorial invariance                             | 267.03        | 106        | .968        | .961        | .046 [.039, .053]        | .056        | 66203.00        |
| 13a. Partial Strong (freed 1 intercept)*                    | 232.07        | 105        | .975        | .969        | .041 [.034, .048]        | .045        | 66175.30        |
| 14a. Partial Strict factorial invariance                    | 272.28        | 117        | .969        | .966        | .043 [.036, .050]        | .077        | 66128.37        |
| <b>14b. 14a, plus freed one unique variance**</b>           | <b>248.04</b> | <b>116</b> | <b>.974</b> | <b>.970</b> | <b>.040 [.033, .047]</b> | <b>.046</b> | <b>66111.40</b> |
| 15b. Model 14b, plus invariance of LV variances             | 338.01        | 120        | .957        | .953        | .050 [.044, .057]        | .152        | 66172.31        |
| 16b. Model 15b, plus invariance of LV covariances           | 357.21        | 126        | .955        | .952        | .051 [.045, .057]        | .166        | 66147.95        |
| 17b. Model 16b, plus invariance of LV means                 | 452.04        | 130        | .937        | .936        | .059 [.053, .065]        | .206        | 66213.73        |

**Red ink:**      **Optimal higher-order model (with g factor)**  
**Blue ink:**    **Optimal correlated factor model (without g factor)**

\* Intercept freed was for the Trail Making MS (or Motor Speed) indicator in the NNN sample

\*\* Unique variance freed was for the Trail Making MS (or Motor Speed) indicator in the NNN sample

Factor means in NNN sample (means fixed to 0.00 in Pearson sample, as reference group)

| Model 4b: WITH g factor | Mean (SE)     | Corrected mean (adjusting for g) |
|-------------------------|---------------|----------------------------------|
| g                       | -0.569 (.098) |                                  |
| Color-Word              | -0.337 (.068) | $-0.337 - 0.569 = -0.906 (.108)$ |
| Trail Making Test       | -0.025 (.092) | $-0.025 - 0.569 = -0.594 (.147)$ |
| Fluency                 | 0.253 (.068)  | $0.253 - 0.569 = -0.316 (.109)$  |
| Inhibition              | 0.110 (.084)  | $0.110 - 0.569 = -0.459 (.135)$  |

Model 14b: WITHOUT g factor

|                   |               |
|-------------------|---------------|
| Color-Word        | -0.759 (.088) |
| Trail Making Test | -0.436 (.130) |
| Fluency           | -0.144 (.085) |
| Inhibition        | -0.220 (.137) |
