# Supplementary material
Source: PubMed Central journal article supplement (PMC9945479)
Supplement: NIHMS1868877-supplement-Supplemental_Material_10.pdf [file NIHMS1868877-supplement-Supplemental_Material_10.pdf]

**Supplemental Table 8**  
*Factor Score Correlations with Age and Education*

|                         |                     | WAIS-IV |           |
|-------------------------|---------------------|---------|-----------|
|                         |                     | AGE     | EDUCATION |
| General                 | Pearson Correlation | .046*   | .447**    |
|                         | Sig. (2-tailed)     | .044    | .000      |
|                         | N                   | 1910    | 433       |
| Verbal Comp             | Pearson Correlation | .039    | .481**    |
|                         | Sig. (2-tailed)     | .088    | .000      |
|                         | N                   | 1910    | 433       |
| Perceptual Reasoning    | Pearson Correlation | .030    | .426**    |
|                         | Sig. (2-tailed)     | .189    | .000      |
|                         | N                   | 1910    | 433       |
| Working Memory          | Pearson Correlation | .054*   | .426**    |
|                         | Sig. (2-tailed)     | .018    | .000      |
|                         | N                   | 1910    | 433       |
| Processing Speed        | Pearson Correlation | .057*   | .398**    |
|                         | Sig. (2-tailed)     | .012    | .000      |
|                         | N                   | 1910    | 433       |
| CVLT3                   |                     |         |           |
| General                 | Pearson Correlation | -.163** | .255**    |
|                         | Sig. (2-tailed)     | .000    | .000      |
|                         | N                   | 657     | 209       |
| Attention               | Pearson Correlation | -.174** | .255**    |
|                         | Sig. (2-tailed)     | .000    | .000      |
|                         | N                   | 657     | 209       |
| Learning                | Pearson Correlation | -.153** | .255**    |
|                         | Sig. (2-tailed)     | .000    | .000      |
|                         | N                   | 657     | 209       |
| Recall-Recognition      | Pearson Correlation | -.163** | .245**    |
|                         | Sig. (2-tailed)     | .000    | .000      |
|                         | N                   | 657     | 209       |
| Inaccurate Memory       | Pearson Correlation | -.102** | .256**    |
|                         | Sig. (2-tailed)     | .009    | .000      |
|                         | N                   | 657     | 209       |
| WMS-IV                  |                     |         |           |
| General Learning-Recall | Pearson Correlation | -.080** | .344**    |
|                         | Sig. (2-tailed)     | .001    | .000      |
|                         | N                   | 1634    | 365       |

## Supplemental Table 8

### Factor Score Correlations with Age and Education

|                          |                     |         |        |
|--------------------------|---------------------|---------|--------|
| Visual Reproductions     | Pearson Correlation | -.069** | .311** |
|                          | Sig. (2-tailed)     | .005    | .000   |
|                          | N                   | 1634    | 365    |
| Logical Memory           | Pearson Correlation | -.014   | .307** |
|                          | Sig. (2-tailed)     | .569    | .000   |
|                          | N                   | 1634    | 365    |
| Verbal Paired Associates | Pearson Correlation | -.067** | .351** |
|                          | Sig. (2-tailed)     | .007    | .000   |
|                          | N                   | 1634    | 365    |
| Recognition              | Pearson Correlation | -.527** | .172** |
|                          | Sig. (2-tailed)     | .000    | .001   |
|                          | N                   | 1634    | 365    |
| D-KEFS                   |                     |         |        |
| General                  | Pearson Correlation | -.085*  | .243** |
|                          | Sig. (2-tailed)     | .050    | .000   |
|                          | N                   | 535     | 213    |
| Color Word               | Pearson Correlation | -.089*  | .226** |
|                          | Sig. (2-tailed)     | .039    | .001   |
|                          | N                   | 535     | 213    |
| Trail Making             | Pearson Correlation | -.080   | .240** |
|                          | Sig. (2-tailed)     | .066    | .000   |
|                          | N                   | 535     | 213    |
| Verbal Fluency           | Pearson Correlation | -.147** | .239** |
|                          | Sig. (2-tailed)     | .001    | .000   |
|                          | N                   | 535     | 213    |
| Inhibition-Switching     | Pearson Correlation | -.082   | .243** |
|                          | Sig. (2-tailed)     | .057    | .000   |
|                          | N                   | 535     | 213    |

#### Notes.

\*. Correlation is significant at the 0.05 level (2-tailed, uncorrected).

\*\* . Correlation is significant at the 0.01 level (2-tailed, uncorrected).
