# Supplementary material
Source: PubMed Central journal article supplement (PMC9945479)
Supplement: NIHMS1868877-supplement-Supplemental_Material_11.pdf [file NIHMS1868877-supplement-Supplemental_Material_11.pdf]

**Supplemental Table 9***Factor Score Differences by Sex: Independent Samples T-tests*

| <b>Group Statistics</b> |        |      |         |                |                 |
|-------------------------|--------|------|---------|----------------|-----------------|
|                         | SEX    | N    | Mean    | Std. Deviation | Std. Error Mean |
| WAIS-General            | Male   | 907  | .07411  | .932470        | .030962         |
|                         | Female | 1000 | -.06979 | .862398        | .027271         |
| Verbal Comprehension    | Male   | 907  | .08599  | .914589        | .030368         |
|                         | Female | 1000 | -.08163 | .893348        | .028250         |
| Perceptual Reasoning    | Male   | 907  | .07865  | .921278        | .030591         |
|                         | Female | 1000 | -.07344 | .855723        | .027060         |
| Working Memory          | Male   | 907  | .08373  | .923291        | .030657         |
|                         | Female | 1000 | -.07873 | .834179        | .026379         |
| Processing Speed        | Male   | 907  | -.00687 | .882011        | .029287         |
|                         | Female | 1000 | .00533  | .846217        | .026760         |
| WMS-General             | Male   | 768  | -.06431 | .828306        | .029889         |
|                         | Female | 864  | .05549  | .841839        | .028640         |
| Visual Repro            | Male   | 768  | -.01909 | .852211        | .030752         |
|                         | Female | 864  | .01574  | .841040        | .028613         |
| Logical Memory          | Male   | 768  | -.10919 | .937874        | .033843         |
|                         | Female | 864  | .09488  | .992591        | .033769         |
| Verbal Paired Assoc     | Male   | 768  | -.05751 | .748131        | .026996         |
|                         | Female | 864  | .04973  | .739379        | .025154         |
| Recognition             | Male   | 768  | -.06649 | .716146        | .025842         |
|                         | Female | 864  | .05804  | .721010        | .024529         |
| CVLT-General            | Male   | 301  | -.16326 | .962936        | .055503         |
|                         | Female | 355  | .13588  | .962537        | .051086         |
| Attention               | Male   | 301  | -.16476 | .881748        | .050823         |

**Supplemental Table 9**

*Factor Score Differences by Sex: Independent Samples T-tests*

| <b>Group Statistics</b> |        |     |         |                |                 |
|-------------------------|--------|-----|---------|----------------|-----------------|
|                         | SEX    | N   | Mean    | Std. Deviation | Std. Error Mean |
| Learning Effic          | Female | 355 | .13710  | .894229        | .047461         |
|                         | Male   | 301 | -.15287 | .963170        | .055516         |
| Recall-Recog            | Female | 355 | .12611  | .960144        | .050959         |
|                         | Male   | 301 | -.16066 | .977773        | .056358         |
| Inaccurate Memory       | Female | 355 | .13381  | .976598        | .051832         |
|                         | Male   | 301 | -.14754 | .895047        | .051590         |
| D-KEFS-General          | Female | 355 | .12645  | .930507        | .049386         |
|                         | Male   | 265 | .01558  | .875320        | .053771         |
| Color Word Interf       | Female | 270 | -.01526 | .839063        | .051064         |
|                         | Male   | 265 | .02713  | 1.828456       | .112321         |
| Trail Making            | Female | 270 | -.02660 | 1.756023       | .106868         |
|                         | Male   | 265 | -.01374 | 1.441727       | .088565         |
| Verbal Fluency          | Female | 270 | .01349  | 1.310556       | .079758         |
|                         | Male   | 265 | .02440  | 1.100005       | .067573         |
| Inhibition-Switching    | Female | 270 | -.02394 | 1.119874       | .068153         |
|                         | Male   | 265 | .11294  | 5.836995       | .358564         |
|                         | Female | 270 | -.11076 | 5.614590       | .341693         |

**Supplemental Table 9**

*Factor Score Differences by Sex: Independent Samples T-tests*

**Independent Samples Test**

|                      |                             | Levene's Test for Equality of Variances |      | t-test for Equality of Means |          |                 |                 |                       |                                           |         |
|----------------------|-----------------------------|-----------------------------------------|------|------------------------------|----------|-----------------|-----------------|-----------------------|-------------------------------------------|---------|
|                      |                             | F                                       | Sig. | t                            | df       | Sig. (2-tailed) | Mean Difference | Std. Error Difference | 95% Confidence Interval of the Difference |         |
|                      |                             |                                         |      |                              |          |                 |                 |                       | Lower                                     | Upper   |
| WAIS-General         | Equal variances assumed     | 6.087                                   | .014 | 3.501                        | 1905     | .000            | .143902         | .041103               | .063289                                   | .224514 |
|                      | Equal variances not assumed |                                         |      | 3.488                        | 1848.219 | .000            | .143902         | .041260               | .062981                                   | .224823 |
| Verbal Comprehension | Equal variances assumed     | .232                                    | .630 | 4.046                        | 1905     | .000            | .167624         | .041429               | .086373                                   | .248876 |
|                      | Equal variances not assumed |                                         |      | 4.041                        | 1877.448 | .000            | .167624         | .041477               | .086279                                   | .248970 |
| Perceptual Reasoning | Equal variances assumed     | 5.946                                   | .015 | 3.737                        | 1905     | .000            | .152083         | .040695               | .072272                                   | .231895 |

**Supplemental Table 9**

*Factor Score Differences by Sex: Independent Samples T-tests*

|                  |                             | Independent Samples Test                |      |                              |          |                 |                 |                       |                                           |          |
|------------------|-----------------------------|-----------------------------------------|------|------------------------------|----------|-----------------|-----------------|-----------------------|-------------------------------------------|----------|
|                  |                             | Levene's Test for Equality of Variances |      | t-test for Equality of Means |          |                 |                 |                       |                                           |          |
|                  |                             | F                                       | Sig. | t                            | df       | Sig. (2-tailed) | Mean Difference | Std. Error Difference | 95% Confidence Interval of the Difference |          |
|                  |                             |                                         |      |                              |          |                 |                 |                       | Lower                                     | Upper    |
|                  | Equal variances not assumed |                                         |      | 3.724                        | 1850.858 | .000            | .152083         | .040842               | .071983                                   | .232184  |
| Working Memory   | Equal variances assumed     | 10.956                                  | .001 | 4.037                        | 1905     | .000            | .162461         | .040245               | .083532                                   | .241390  |
|                  | Equal variances not assumed |                                         |      | 4.017                        | 1832.968 | .000            | .162461         | .040444               | .083140                                   | .241782  |
| Processing Speed | Equal variances assumed     | 1.777                                   | .183 | -.308                        | 1905     | .758            | -.012197        | .039591               | -.089843                                  | .065449  |
|                  | Equal variances not assumed |                                         |      | -.307                        | 1868.903 | .759            | -.012197        | .039671               | -.090001                                  | .065607  |
| WMS-General      | Equal variances assumed     | .023                                    | .881 | -2.891                       | 1630     | .004            | -.119797        | .041435               | -.201068                                  | -.038525 |

**Supplemental Table 9**

*Factor Score Differences by Sex: Independent Samples T-tests*

|                     |                             | Independent Samples Test                |      |                              |          |                 |                 |                       |                                           |          |
|---------------------|-----------------------------|-----------------------------------------|------|------------------------------|----------|-----------------|-----------------|-----------------------|-------------------------------------------|----------|
|                     |                             | Levene's Test for Equality of Variances |      | t-test for Equality of Means |          |                 |                 |                       |                                           |          |
|                     |                             | F                                       | Sig. | t                            | df       | Sig. (2-tailed) | Mean Difference | Std. Error Difference | 95% Confidence Interval of the Difference |          |
|                     |                             |                                         |      |                              |          |                 |                 |                       | Lower                                     | Upper    |
|                     | Equal variances not assumed |                                         |      | -2.894                       | 1613.303 | .004            | -.119797        | .041396               | -.200992                                  | -.038602 |
| Visual Repro        | Equal variances assumed     | .010                                    | .920 | -.830                        | 1630     | .407            | -.034827        | .041972               | -.117151                                  | .047497  |
|                     | Equal variances not assumed |                                         |      | -.829                        | 1602.465 | .407            | -.034827        | .042004               | -.117216                                  | .047562  |
| Logical Memory      | Equal variances assumed     | 2.067                                   | .151 | -4.254                       | 1630     | .000            | -.204078        | .047968               | -.298164                                  | -.109993 |
|                     | Equal variances not assumed |                                         |      | -4.269                       | 1623.920 | .000            | -.204078        | .047808               | -.297851                                  | -.110306 |
| Verbal Paired Assoc | Equal variances assumed     | .263                                    | .608 | -2.908                       | 1630     | .004            | -.107241        | .036873               | -.179564                                  | -.034917 |

**Supplemental Table 9**

*Factor Score Differences by Sex: Independent Samples T-tests*

|              |                             | Independent Samples Test                |      |                              |          |                 |                 |                       |                                           |          |
|--------------|-----------------------------|-----------------------------------------|------|------------------------------|----------|-----------------|-----------------|-----------------------|-------------------------------------------|----------|
|              |                             | Levene's Test for Equality of Variances |      | t-test for Equality of Means |          |                 |                 |                       |                                           |          |
|              |                             | F                                       | Sig. | t                            | df       | Sig. (2-tailed) | Mean Difference | Std. Error Difference | 95% Confidence Interval of the Difference |          |
|              |                             |                                         |      |                              |          |                 |                 |                       | Lower                                     | Upper    |
|              | Equal variances not assumed |                                         |      | -2.906                       | 1603.049 | .004            | -.107241        | .036899               | -.179615                                  | -.034866 |
| Recognition  | Equal variances assumed     | .233                                    | .629 | -3.494                       | 1630     | .000            | -.124535        | .035644               | -.194448                                  | -.054623 |
|              | Equal variances not assumed |                                         |      | -3.495                       | 1610.103 | .000            | -.124535        | .035630               | -.194421                                  | -.054650 |
| CVLT-General | Equal variances assumed     | .020                                    | .889 | -3.966                       | 654      | .000            | -.299141        | .075432               | -.447259                                  | -.151024 |
|              | Equal variances not assumed |                                         |      | -3.966                       | 636.490  | .000            | -.299141        | .075434               | -.447272                                  | -.151011 |
| Attention    | Equal variances assumed     | .019                                    | .892 | -4.336                       | 654      | .000            | -.301863        | .069618               | -.438565                                  | -.165160 |

**Supplemental Table 9**

*Factor Score Differences by Sex: Independent Samples T-tests*

|                   |                             | Independent Samples Test                |      |                              |         |                 |                 |                       |                                           |          |
|-------------------|-----------------------------|-----------------------------------------|------|------------------------------|---------|-----------------|-----------------|-----------------------|-------------------------------------------|----------|
|                   |                             | Levene's Test for Equality of Variances |      | t-test for Equality of Means |         |                 |                 |                       |                                           |          |
|                   |                             | F                                       | Sig. | t                            | df      | Sig. (2-tailed) | Mean Difference | Std. Error Difference | 95% Confidence Interval of the Difference |          |
|                   |                             |                                         |      |                              |         |                 |                 |                       | Lower                                     | Upper    |
|                   | Equal variances not assumed |                                         |      | -4.341                       | 639.340 | .000            | -.301863        | .069538               | -.438413                                  | -.165312 |
| Learning Effic    | Equal variances assumed     | .069                                    | .793 | -3.703                       | 654     | .000            | -.278980        | .075339               | -.426915                                  | -.131045 |
|                   | Equal variances not assumed |                                         |      | -3.702                       | 635.926 | .000            | -.278980        | .075358               | -.426961                                  | -.130999 |
| Recall-Recog      | Equal variances assumed     | .006                                    | .938 | -3.846                       | 654     | .000            | -.294463        | .076561               | -.444799                                  | -.144128 |
|                   | Equal variances not assumed |                                         |      | -3.846                       | 636.328 | .000            | -.294463        | .076569               | -.444822                                  | -.144105 |
| Inaccurate Memory | Equal variances assumed     | .023                                    | .880 | -3.824                       | 654     | .000            | -.273989        | .071647               | -.414674                                  | -.133304 |

**Supplemental Table 9**

*Factor Score Differences by Sex: Independent Samples T-tests*

**Independent Samples Test**

|                   |                             | Levene's Test for Equality of Variances |      | t-test for Equality of Means |         |                 |                 |                       |                                           |          |
|-------------------|-----------------------------|-----------------------------------------|------|------------------------------|---------|-----------------|-----------------|-----------------------|-------------------------------------------|----------|
|                   |                             | F                                       | Sig. | t                            | df      | Sig. (2-tailed) | Mean Difference | Std. Error Difference | 95% Confidence Interval of the Difference |          |
|                   |                             |                                         |      |                              |         |                 |                 |                       | Lower                                     | Upper    |
|                   | Equal variances not assumed |                                         |      | -3.836                       | 643.680 | .000            | -.273989        | .071418               | -.414229                                  | -.133749 |
| D-KEFS-General    | Equal variances assumed     | .114                                    | .736 | .416                         | 533     | .678            | .030840         | .074124               | -.114771                                  | .176452  |
|                   | Equal variances not assumed |                                         |      | .416                         | 531.025 | .678            | .030840         | .074154               | -.114830                                  | .176511  |
| Color Word Interf | Equal variances assumed     | .317                                    | .574 | .347                         | 533     | .729            | .053736         | .154980               | -.250710                                  | .358181  |
|                   | Equal variances not assumed |                                         |      | .347                         | 531.144 | .729            | .053736         | .155038               | -.250828                                  | .358299  |
| Trail Making      | Equal variances assumed     | 1.042                                   | .308 | -.229                        | 533     | .819            | -.027221        | .119079               | -.261142                                  | .206700  |



**Supplemental Table 9**

*Factor Score Differences by Sex: Independent Samples T-tests*

|                      |                             | Independent Samples Test                |      |                              |         |                 |                 |                       |                                           |          |
|----------------------|-----------------------------|-----------------------------------------|------|------------------------------|---------|-----------------|-----------------|-----------------------|-------------------------------------------|----------|
|                      |                             | Levene's Test for Equality of Variances |      | t-test for Equality of Means |         |                 |                 |                       |                                           |          |
|                      |                             | F                                       | Sig. | t                            | df      | Sig. (2-tailed) | Mean Difference | Std. Error Difference | 95% Confidence Interval of the Difference |          |
|                      |                             |                                         |      |                              |         |                 |                 |                       | Lower                                     | Upper    |
|                      | Equal variances not assumed |                                         |      | -.228                        | 526.193 | .819            | -.027221        | .119185               | -.261357                                  | .206915  |
| Verbal Fluency       | Equal variances assumed     | .052                                    | .819 | .504                         | 533     | .615            | .048344         | .095990               | -.140220                                  | .236909  |
|                      | Equal variances not assumed |                                         |      | .504                         | 533.000 | .615            | .048344         | .095974               | -.140189                                  | .236878  |
| Inhibition-Switching | Equal variances assumed     | .087                                    | .768 | .452                         | 533     | .652            | .223706         | .495120               | -.748920                                  | 1.196332 |
|                      | Equal variances not assumed |                                         |      | .452                         | 531.241 | .652            | .223706         | .495300               | -.749281                                  | 1.196693 |

**Supplemental Table 9**

*Factor Score Differences by Sex: Independent Samples T-tests*

**Independent Samples Effect Sizes**

|                      |                    | Standardizer <sup>a</sup> | Point Estimate | 95% Confidence Interval |       |
|----------------------|--------------------|---------------------------|----------------|-------------------------|-------|
|                      |                    |                           |                | Lower                   | Upper |
| WAIS-General         | Cohen's d          | .896407                   | .161           | .070                    | .251  |
|                      | Hedges' correction | .896760                   | .160           | .070                    | .250  |
|                      | Glass's delta      | .862398                   | .167           | .077                    | .257  |
| Verbal Comprehension | Cohen's d          | .903512                   | .186           | .095                    | .276  |
|                      | Hedges' correction | .903868                   | .185           | .095                    | .275  |
|                      | Glass's delta      | .893348                   | .188           | .097                    | .278  |
| Perceptual Reasoning | Cohen's d          | .887504                   | .171           | .081                    | .261  |
|                      | Hedges' correction | .887854                   | .171           | .081                    | .261  |
|                      | Glass's delta      | .855723                   | .178           | .087                    | .268  |
| Working Memory       | Cohen's d          | .877689                   | .185           | .095                    | .275  |
|                      | Hedges' correction | .878035                   | .185           | .095                    | .275  |
|                      | Glass's delta      | .834179                   | .195           | .104                    | .285  |
| Processing Speed     | Cohen's d          | .863425                   | -.014          | -.104                   | .076  |
|                      | Hedges' correction | .863765                   | -.014          | -.104                   | .076  |
|                      | Glass's delta      | .846217                   | -.014          | -.104                   | .075  |
| WMS-General          | Cohen's d          | .835499                   | -.143          | -.241                   | -.046 |
|                      | Hedges' correction | .835883                   | -.143          | -.241                   | -.046 |
|                      | Glass's delta      | .841839                   | -.142          | -.240                   | -.045 |
| Visual Repro         | Cohen's d          | .846315                   | -.041          | -.138                   | .056  |

**Supplemental Table 9**

*Factor Score Differences by Sex: Independent Samples T-tests*

**Independent Samples Effect Sizes**

|                     |                    | Standardizer <sup>a</sup> | Point Estimate | 95% Confidence Interval |       |
|---------------------|--------------------|---------------------------|----------------|-------------------------|-------|
|                     |                    |                           |                | Lower                   | Upper |
|                     | Hedges' correction | .846705                   | -.041          | -.138                   | .056  |
|                     | Glass's delta      | .841040                   | -.041          | -.139                   | .056  |
| Logical Memory      | Cohen's d          | .967229                   | -.211          | -.308                   | -.113 |
|                     | Hedges' correction | .967675                   | -.211          | -.308                   | -.113 |
|                     | Glass's delta      | .992591                   | -.206          | -.303                   | -.108 |
|                     | Cohen's d          | .743510                   | -.144          | -.242                   | -.047 |
| Verbal Paired Assoc | Hedges' correction | .743852                   | -.144          | -.241                   | -.047 |
|                     | Glass's delta      | .739379                   | -.145          | -.242                   | -.048 |
| Recognition         | Cohen's d          | .718726                   | -.173          | -.271                   | -.076 |
|                     | Hedges' correction | .719057                   | -.173          | -.271                   | -.076 |
|                     | Glass's delta      | .721010                   | -.173          | -.270                   | -.075 |
|                     | Cohen's d          | .962720                   | -.311          | -.465                   | -.156 |
| CVLT-General        | Hedges' correction | .963826                   | -.310          | -.465                   | -.156 |
|                     | Glass's delta      | .962537                   | -.311          | -.466                   | -.155 |
| Attention           | Cohen's d          | .888526                   | -.340          | -.494                   | -.185 |
|                     | Hedges' correction | .889546                   | -.339          | -.494                   | -.185 |
|                     | Glass's delta      | .894229                   | -.338          | -.493                   | -.182 |
|                     | Cohen's d          | .961533                   | -.290          | -.444                   | -.136 |
| Learning Effic      | Hedges' correction | .962637                   | -.290          | -.444                   | -.136 |
|                     | Glass's delta      | .960144                   | -.291          | -.445                   | -.135 |
| Recall-Recog        | Cohen's d          | .977137                   | -.301          | -.456                   | -.147 |
|                     | Hedges' correction | .978259                   | -.301          | -.455                   | -.147 |
|                     | Glass's delta      | .976598                   | -.302          | -.456                   | -.146 |

**Supplemental Table 9**

*Factor Score Differences by Sex: Independent Samples T-tests*

**Independent Samples Effect Sizes**

|                      |                    | Standardizer <sup>a</sup> | Point Estimate | 95% Confidence Interval |       |
|----------------------|--------------------|---------------------------|----------------|-------------------------|-------|
|                      |                    |                           |                | Lower                   | Upper |
| Inaccurate Memory    | Cohen's d          | .914412                   | -.300          | -.454                   | -.145 |
|                      | Hedges' correction | .915462                   | -.299          | -.453                   | -.145 |
|                      | Glass's delta      | .930507                   | -.294          | -.449                   | -.139 |
| D-KEFS-General       | Cohen's d          | .857214                   | .036           | -.134                   | .205  |
|                      | Hedges' correction | .858422                   | .036           | -.133                   | .205  |
|                      | Glass's delta      | .839063                   | .037           | -.133                   | .206  |
| Color Word Interf    | Cohen's d          | 1.792266                  | .030           | -.140                   | .199  |
|                      | Hedges' correction | 1.794793                  | .030           | -.139                   | .199  |
|                      | Glass's delta      | 1.756023                  | .031           | -.139                   | .200  |
| Trail Making         | Cohen's d          | 1.377089                  | -.020          | -.189                   | .150  |
|                      | Hedges' correction | 1.379030                  | -.020          | -.189                   | .150  |
|                      | Glass's delta      | 1.310556                  | -.021          | -.190                   | .149  |
| Verbal Fluency       | Cohen's d          | 1.110077                  | .044           | -.126                   | .213  |
|                      | Hedges' correction | 1.111642                  | .043           | -.126                   | .213  |
|                      | Glass's delta      | 1.119874                  | .043           | -.126                   | .213  |
| Inhibition-Switching | Cohen's d          | 5.725829                  | .039           | -.130                   | .209  |
|                      | Hedges' correction | 5.733902                  | .039           | -.130                   | .208  |
|                      | Glass's delta      | 5.614590                  | .040           | -.130                   | .209  |

Notes. The denominator used in estimating the effect sizes. Cohen's d uses the pooled standard deviation. Hedges' correction uses the pooled standard deviation, plus a correction factor. Glass's delta uses the sample standard deviation of the control group.
